# Supplementary material for: Intravital microscopic thermometry of rat mammary epithelium by fluorescent nanodiamond
Source: Royal Society of Chemistry journal article supplement (doi:10.1039/d4nh00237g), 2024-01-01
Supplement: d4nh00237g3.zip [file d4nh00237g3.zip]

## Sheet: Fig2I
FND	Replicate	0to1	1to2	2to3	3to4	4to5	5to6	6to7	7to8	8to9	9to10	over10
FND-COOH	1	272	200	102	62	53	31	33	16	19	22	190
FND-COOH	2	413	233	92	62	32	29	23	16	12	13	75
FND-COOH	3	400	171	74	45	42	24	24	17	19	17	167
FND-HPG	1	386	184	121	63	52	31	29	27	10	11	86
FND-HPG	2	438	166	120	66	42	35	24	23	18	11	57
FND-HPG	3	502	202	87	39	27	17	21	6	8	4	87
FND-HPG-COOH	1	287	159	112	101	51	53	43	23	17	20	134
FND-HPG-COOH	2	281	197	121	74	61	45	40	25	30	10	116
FND-HPG-COOH	3	267	167	99	63	59	53	44	24	20	21	183

## Sheet: Fig2J
FND	Replicate	0to1	1to2	2to3	3to4	4to5	5to6	6to7	7to8	8to9	9to10	over10
FND-COOH	1	349	194	105	70	42	41	30	20	15	15	119
FND-COOH	2	301	169	79	78	38	36	33	28	25	14	199
FND-COOH	3	372	203	118	70	64	26	24	13	16	7	87
FND-HPG	1	630	169	73	30	16	11	9	2	3	5	52
FND-HPG	2	395	195	128	81	41	23	14	16	11	10	86
FND-HPG	3	596	186	65	31	16	15	9	7	5	3	67
FND-HPG-COOH	1	328	171	92	70	41	35	27	23	20	18	175
FND-HPG-COOH	2	535	204	97	36	25	12	15	9	5	5	57
FND-HPG-COOH	3	252	136	104	74	64	49	38	29	16	30	208

## Sheet: Fig3Y
Frequency	Intensity
2820	0.998853
2821	1.00198
2822	1.00003
2823	1.00035
2824	1.00036
2825	1.00068
2826	1.00042
2827	1.00016
2828	1.00037
2829	1.00061
2830	1.00018
2831	1.00147
2832	1.00026
2833	0.99955
2834	0.9998
2835	1.0005
2836	1.00152
2837	1.00134
2838	0.999815
2839	1.00034
2840	1.00095
2841	1.00139
2842	1.00011
2843	1.00106
2844	0.999787
2845	0.999952
2846	1.00049
2847	1
2848	1.00037
2849	1.00004
2850	0.999943
2851	0.999957
2852	1.00101
2853	0.999893
2854	1.00066
2855	1.00167
2856	1.00138
2857	0.99943
2858	1.00027
2859	1.00094
2860	1.00011
2861	0.999627
2862	1.00062
2863	0.999695
2864	0.999597
2865	1.00079
2866	1.00128
2867	0.999286
2868	1.00005
2869	1.00035
2870	1.0006
2871	0.999025
2872	1.0002
2873	1.00081
2874	1.00008
2875	0.999781
2876	0.999194
2877	1.00048
2878	0.999993
2879	1.00071
2880	1.00067
2881	1.00069
2882	0.999856
2883	1.00021
2884	1
2885	0.999313
2886	0.999182
2887	0.999887
2888	1.00065
2889	1.00028
2890	1.00016
2891	0.99923
2892	0.999592
2893	1.00012
2894	0.99967
2895	0.999647
2896	1.00027
2897	1.00028
2898	1.00082
2899	1.00136
2900	0.999456
2901	0.999833
2902	1.00035
2903	0.999945
2904	1.00028
2905	0.999831
2906	1.00086
2907	1.00057
2908	0.999442
2909	0.999166
2910	1.00054
2911	0.999949
2912	0.99986
2913	0.999192
2914	1.00059
2915	1.00043
2916	0.999579
2917	0.999786
2918	0.999207
2919	1.00089
2920	0.99967

## Sheet: Fig3Z
Frequency	Intensity
2820	0.999056
2821	0.998742
2822	0.99969
2823	0.99479
2824	0.998045
2825	0.998093
2826	0.999114
2827	0.997266
2828	0.997794
2829	0.998403
2830	0.998449
2831	0.997903
2832	0.995771
2833	0.998039
2834	0.997936
2835	0.996543
2836	0.995395
2837	0.996099
2838	0.996016
2839	0.997531
2840	0.995403
2841	0.99508
2842	0.995759
2843	0.993504
2844	0.995817
2845	0.994939
2846	0.993594
2847	0.993037
2848	0.992308
2849	0.99289
2850	0.991255
2851	0.990466
2852	0.990005
2853	0.98879
2854	0.986461
2855	0.984902
2856	0.984074
2857	0.982385
2858	0.981479
2859	0.981941
2860	0.980986
2861	0.979706
2862	0.978898
2863	0.979912
2864	0.978792
2865	0.97794
2866	0.97866
2867	0.978785
2868	0.97962
2869	0.98066
2870	0.980828
2871	0.980333
2872	0.97879
2873	0.978598
2874	0.978545
2875	0.979369
2876	0.979791
2877	0.980025
2878	0.981284
2879	0.982778
2880	0.984819
2881	0.984779
2882	0.985915
2883	0.987143
2884	0.98793
2885	0.989773
2886	0.99022
2887	0.992934
2888	0.992408
2889	0.993892
2890	0.995304
2891	0.994744
2892	0.994349
2893	0.994298
2894	0.996646
2895	0.995334
2896	0.996255
2897	0.997027
2898	0.998181
2899	0.998874
2900	0.997113
2901	0.997294
2902	0.99844
2903	0.997438
2904	0.997117
2905	0.99725
2906	0.997378
2907	0.998278
2908	0.998454
2909	0.999358
2910	0.998326
2911	0.999554
2912	1.00104
2913	0.998944
2914	0.99942
2915	0.999499
2916	0.996171
2917	0.999145
2918	0.999453
2919	0.99938
2920	0.998851

## Sheet: Fig4B
Data_type	Frequency	Intensity
Measured	2855	0.996489
Measured	2855.3	1.00367
Measured	2855.6	0.998168
Measured	2855.9	0.994278
Measured	2856.2	1.00429
Measured	2856.5	0.989966
Measured	2856.8	1.00663
Measured	2857.1	0.989781
Measured	2857.4	0.997798
Measured	2857.7	1.00459
Measured	2858	0.996202
Measured	2858.3	1.0082
Measured	2858.6	1.0009
Measured	2858.9	1.00357
Measured	2859.2	1.00178
Measured	2859.5	0.994001
Measured	2859.8	1.00754
Measured	2860.1	0.996117
Measured	2860.4	0.999123
Measured	2860.7	1.0044
Measured	2861	0.992573
Measured	2861.3	1.00671
Measured	2861.6	0.995782
Measured	2861.9	0.998049
Measured	2862.2	1.00381
Measured	2862.5	0.992907
Measured	2862.8	1.00226
Measured	2863.1	0.992719
Measured	2863.4	0.996653
Measured	2863.7	1.00051
Measured	2864	0.98991
Measured	2864.3	1.0068
Measured	2864.6	0.997242
Measured	2864.9	0.999143
Measured	2865.2	0.999915
Measured	2865.5	0.992575
Measured	2865.8	1.00624
Measured	2866.1	0.988652
Measured	2866.4	1.00256
Measured	2866.7	1.00275
Measured	2867	0.99163
Measured	2867.3	1.00964
Measured	2867.6	0.9974
Measured	2867.9	1.00193
Measured	2868.2	1.00894
Measured	2868.5	0.993602
Measured	2868.8	1.01216
Measured	2869.1	0.999182
Measured	2869.4	1.00431
Measured	2869.7	1.00362
Measured	2870	0.9973
Measured	2870.3	1.00984
Measured	2870.6	0.988878
Measured	2870.9	1.0067
Measured	2871.2	1.00038
Measured	2871.5	0.999437
Measured	2871.8	1.00503
Measured	2872.1	0.995198
Measured	2872.4	1.00703
Measured	2872.7	0.995997
Measured	2873	0.997858
Measured	2873.3	1.00888
Measured	2873.6	0.991984
Measured	2873.9	1.00457
Measured	2874.2	0.996689
Measured	2874.5	1.00128
Measured	2874.8	1.00414
Measured	2875.1	0.991024
Measured	2875.4	1.00256
Measured	2875.7	0.993767
Measured	2876	1.0021
Measured	2876.3	1.0068
Measured	2876.6	0.993766
Measured	2876.9	1.01001
Measured	2877.2	0.991679
Measured	2877.5	0.998136
Measured	2877.8	1.00347
Measured	2878.1	0.995159
Measured	2878.4	1.0061
Measured	2878.7	0.991545
Measured	2879	1.01103
Measured	2879.3	0.999668
Measured	2879.6	0.998501
Measured	2879.9	1.00695
Measured	2880.2	0.997684
Measured	2880.5	1.00147
Measured	2880.8	0.997734
Measured	2881.1	1.00033
Measured	2881.4	1.00841
Measured	2881.7	0.993866
Measured	2882	1.00824
Measured	2882.3	0.999394
Measured	2882.6	1.00005
Measured	2882.9	1.00914
Measured	2883.2	0.996065
Measured	2883.5	1.00416
Measured	2883.8	0.999346
Measured	2884.1	1.001
Measured	2884.4	0.99962
Measured	2884.7	0.998263
Measured	2885	1.00621
Fitted	2855	0.999981
Fitted	2855.03	0.999981
Fitted	2855.06	0.999981
Fitted	2855.09	0.999981
Fitted	2855.12	0.99998
Fitted	2855.15	0.99998
Fitted	2855.18	0.99998
Fitted	2855.21	0.99998
Fitted	2855.24	0.99998
Fitted	2855.27	0.999979
Fitted	2855.3	0.999979
Fitted	2855.33	0.999979
Fitted	2855.36	0.999979
Fitted	2855.39	0.999979
Fitted	2855.42	0.999978
Fitted	2855.45	0.999978
Fitted	2855.48	0.999978
Fitted	2855.51	0.999978
Fitted	2855.54	0.999978
Fitted	2855.57	0.999977
Fitted	2855.6	0.999977
Fitted	2855.63	0.999977
Fitted	2855.66	0.999977
Fitted	2855.69	0.999977
Fitted	2855.72	0.999976
Fitted	2855.75	0.999976
Fitted	2855.78	0.999976
Fitted	2855.81	0.999976
Fitted	2855.84	0.999975
Fitted	2855.87	0.999975
Fitted	2855.9	0.999975
Fitted	2855.93	0.999975
Fitted	2855.96	0.999974
Fitted	2855.99	0.999974
Fitted	2856.02	0.999974
Fitted	2856.05	0.999974
Fitted	2856.08	0.999973
Fitted	2856.11	0.999973
Fitted	2856.14	0.999973
Fitted	2856.17	0.999973
Fitted	2856.2	0.999972
Fitted	2856.23	0.999972
Fitted	2856.26	0.999972
Fitted	2856.29	0.999971
Fitted	2856.32	0.999971
Fitted	2856.35	0.999971
Fitted	2856.38	0.99997
Fitted	2856.41	0.99997
Fitted	2856.44	0.99997
Fitted	2856.47	0.99997
Fitted	2856.5	0.999969
Fitted	2856.53	0.999969
Fitted	2856.56	0.999969
Fitted	2856.59	0.999968
Fitted	2856.62	0.999968
Fitted	2856.65	0.999968
Fitted	2856.68	0.999967
Fitted	2856.71	0.999967
Fitted	2856.74	0.999966
Fitted	2856.77	0.999966
Fitted	2856.8	0.999966
Fitted	2856.83	0.999965
Fitted	2856.86	0.999965
Fitted	2856.89	0.999965
Fitted	2856.92	0.999964
Fitted	2856.95	0.999964
Fitted	2856.98	0.999963
Fitted	2857.01	0.999963
Fitted	2857.04	0.999962
Fitted	2857.07	0.999962
Fitted	2857.1	0.999962
Fitted	2857.13	0.999961
Fitted	2857.16	0.999961
Fitted	2857.19	0.99996
Fitted	2857.22	0.99996
Fitted	2857.25	0.999959
Fitted	2857.28	0.999959
Fitted	2857.31	0.999958
Fitted	2857.34	0.999958
Fitted	2857.37	0.999957
Fitted	2857.4	0.999957
Fitted	2857.43	0.999956
Fitted	2857.46	0.999956
Fitted	2857.49	0.999955
Fitted	2857.52	0.999955
Fitted	2857.55	0.999954
Fitted	2857.58	0.999954
Fitted	2857.61	0.999953
Fitted	2857.64	0.999952
Fitted	2857.67	0.999952
Fitted	2857.7	0.999951
Fitted	2857.73	0.999951
Fitted	2857.76	0.99995
Fitted	2857.79	0.999949
Fitted	2857.82	0.999949
Fitted	2857.85	0.999948
Fitted	2857.88	0.999947
Fitted	2857.91	0.999947
Fitted	2857.94	0.999946
Fitted	2857.97	0.999945
Fitted	2858	0.999945
Fitted	2858.03	0.999944
Fitted	2858.06	0.999943
Fitted	2858.09	0.999942
Fitted	2858.12	0.999942
Fitted	2858.15	0.999941
Fitted	2858.18	0.99994
Fitted	2858.21	0.999939
Fitted	2858.24	0.999938
Fitted	2858.27	0.999937
Fitted	2858.3	0.999937
Fitted	2858.33	0.999936
Fitted	2858.36	0.999935
Fitted	2858.39	0.999934
Fitted	2858.42	0.999933
Fitted	2858.45	0.999932
Fitted	2858.48	0.999931
Fitted	2858.51	0.99993
Fitted	2858.54	0.999929
Fitted	2858.57	0.999928
Fitted	2858.6	0.999927
Fitted	2858.63	0.999926
Fitted	2858.66	0.999925
Fitted	2858.69	0.999924
Fitted	2858.72	0.999923
Fitted	2858.75	0.999921
Fitted	2858.78	0.99992
Fitted	2858.81	0.999919
Fitted	2858.84	0.999918
Fitted	2858.87	0.999917
Fitted	2858.9	0.999915
Fitted	2858.93	0.999914
Fitted	2858.96	0.999913
Fitted	2858.99	0.999911
Fitted	2859.02	0.99991
Fitted	2859.05	0.999908
Fitted	2859.08	0.999907
Fitted	2859.11	0.999905
Fitted	2859.14	0.999904
Fitted	2859.17	0.999902
Fitted	2859.2	0.999901
Fitted	2859.23	0.999899
Fitted	2859.26	0.999898
Fitted	2859.29	0.999896
Fitted	2859.32	0.999894
Fitted	2859.35	0.999892
Fitted	2859.38	0.99989
Fitted	2859.41	0.999889
Fitted	2859.44	0.999887
Fitted	2859.47	0.999885
Fitted	2859.5	0.999883
Fitted	2859.53	0.999881
Fitted	2859.56	0.999879
Fitted	2859.59	0.999876
Fitted	2859.62	0.999874
Fitted	2859.65	0.999872
Fitted	2859.68	0.99987
Fitted	2859.71	0.999867
Fitted	2859.74	0.999865
Fitted	2859.77	0.999862
Fitted	2859.8	0.99986
Fitted	2859.83	0.999857
Fitted	2859.86	0.999855
Fitted	2859.89	0.999852
Fitted	2859.92	0.999849
Fitted	2859.95	0.999846
Fitted	2859.98	0.999843
Fitted	2860.02	0.99984
Fitted	2860.05	0.999837
Fitted	2860.08	0.999834
Fitted	2860.11	0.99983
Fitted	2860.14	0.999827
Fitted	2860.17	0.999823
Fitted	2860.2	0.99982
Fitted	2860.23	0.999816
Fitted	2860.26	0.999812
Fitted	2860.29	0.999808
Fitted	2860.32	0.999804
Fitted	2860.35	0.9998
Fitted	2860.38	0.999796
Fitted	2860.41	0.999792
Fitted	2860.44	0.999787
Fitted	2860.47	0.999782
Fitted	2860.5	0.999778
Fitted	2860.53	0.999773
Fitted	2860.56	0.999767
Fitted	2860.59	0.999762
Fitted	2860.62	0.999757
Fitted	2860.65	0.999751
Fitted	2860.68	0.999745
Fitted	2860.71	0.999739
Fitted	2860.74	0.999733
Fitted	2860.77	0.999727
Fitted	2860.8	0.99972
Fitted	2860.83	0.999713
Fitted	2860.86	0.999706
Fitted	2860.89	0.999699
Fitted	2860.92	0.999691
Fitted	2860.95	0.999684
Fitted	2860.98	0.999675
Fitted	2861.01	0.999667
Fitted	2861.04	0.999658
Fitted	2861.07	0.999649
Fitted	2861.1	0.99964
Fitted	2861.13	0.99963
Fitted	2861.16	0.99962
Fitted	2861.19	0.99961
Fitted	2861.22	0.999599
Fitted	2861.25	0.999588
Fitted	2861.28	0.999576
Fitted	2861.31	0.999564
Fitted	2861.34	0.999551
Fitted	2861.37	0.999538
Fitted	2861.4	0.999525
Fitted	2861.43	0.99951
Fitted	2861.46	0.999496
Fitted	2861.49	0.99948
Fitted	2861.52	0.999464
Fitted	2861.55	0.999447
Fitted	2861.58	0.99943
Fitted	2861.61	0.999412
Fitted	2861.64	0.999393
Fitted	2861.67	0.999373
Fitted	2861.7	0.999352
Fitted	2861.73	0.99933
Fitted	2861.76	0.999308
Fitted	2861.79	0.999284
Fitted	2861.82	0.999259
Fitted	2861.85	0.999233
Fitted	2861.88	0.999206
Fitted	2861.91	0.999177
Fitted	2861.94	0.999147
Fitted	2861.97	0.999116
Fitted	2862	0.999083
Fitted	2862.03	0.999048
Fitted	2862.06	0.999012
Fitted	2862.09	0.998974
Fitted	2862.12	0.998934
Fitted	2862.15	0.998892
Fitted	2862.18	0.998847
Fitted	2862.21	0.998801
Fitted	2862.24	0.998752
Fitted	2862.27	0.998701
Fitted	2862.3	0.998647
Fitted	2862.33	0.99859
Fitted	2862.36	0.99853
Fitted	2862.39	0.998468
Fitted	2862.42	0.998402
Fitted	2862.45	0.998333
Fitted	2862.48	0.99826
Fitted	2862.51	0.998184
Fitted	2862.54	0.998105
Fitted	2862.57	0.998021
Fitted	2862.6	0.997934
Fitted	2862.63	0.997844
Fitted	2862.66	0.997749
Fitted	2862.69	0.997651
Fitted	2862.72	0.99755
Fitted	2862.75	0.997445
Fitted	2862.78	0.997337
Fitted	2862.81	0.997227
Fitted	2862.84	0.997115
Fitted	2862.87	0.997001
Fitted	2862.9	0.996887
Fitted	2862.93	0.996773
Fitted	2862.96	0.99666
Fitted	2862.99	0.996549
Fitted	2863.02	0.996442
Fitted	2863.05	0.996339
Fitted	2863.08	0.996243
Fitted	2863.11	0.996155
Fitted	2863.14	0.996076
Fitted	2863.17	0.996008
Fitted	2863.2	0.995952
Fitted	2863.23	0.995908
Fitted	2863.26	0.995879
Fitted	2863.29	0.995864
Fitted	2863.32	0.995864
Fitted	2863.35	0.995879
Fitted	2863.38	0.995909
Fitted	2863.41	0.995952
Fitted	2863.44	0.996009
Fitted	2863.47	0.996077
Fitted	2863.5	0.996157
Fitted	2863.53	0.996246
Fitted	2863.56	0.996342
Fitted	2863.59	0.996446
Fitted	2863.62	0.996554
Fitted	2863.65	0.996666
Fitted	2863.68	0.99678
Fitted	2863.71	0.996896
Fitted	2863.74	0.997012
Fitted	2863.77	0.997128
Fitted	2863.8	0.997242
Fitted	2863.83	0.997354
Fitted	2863.86	0.997463
Fitted	2863.89	0.99757
Fitted	2863.92	0.997673
Fitted	2863.95	0.997773
Fitted	2863.98	0.99787
Fitted	2864.01	0.997963
Fitted	2864.04	0.998052
Fitted	2864.07	0.998137
Fitted	2864.1	0.998219
Fitted	2864.13	0.998297
Fitted	2864.16	0.998371
Fitted	2864.19	0.998443
Fitted	2864.22	0.998511
Fitted	2864.25	0.998575
Fitted	2864.28	0.998637
Fitted	2864.31	0.998696
Fitted	2864.34	0.998752
Fitted	2864.37	0.998806
Fitted	2864.4	0.998857
Fitted	2864.43	0.998905
Fitted	2864.46	0.998952
Fitted	2864.49	0.998996
Fitted	2864.52	0.999038
Fitted	2864.55	0.999078
Fitted	2864.58	0.999117
Fitted	2864.61	0.999154
Fitted	2864.64	0.999189
Fitted	2864.67	0.999223
Fitted	2864.7	0.999255
Fitted	2864.73	0.999286
Fitted	2864.76	0.999315
Fitted	2864.79	0.999344
Fitted	2864.82	0.999371
Fitted	2864.85	0.999397
Fitted	2864.88	0.999422
Fitted	2864.91	0.999447
Fitted	2864.94	0.99947
Fitted	2864.97	0.999492
Fitted	2865	0.999514
Fitted	2865.03	0.999535
Fitted	2865.06	0.999555
Fitted	2865.09	0.999575
Fitted	2865.12	0.999593
Fitted	2865.15	0.999612
Fitted	2865.18	0.999629
Fitted	2865.21	0.999647
Fitted	2865.24	0.999663
Fitted	2865.27	0.999679
Fitted	2865.3	0.999695
Fitted	2865.33	0.99971
Fitted	2865.36	0.999725
Fitted	2865.39	0.99974
Fitted	2865.42	0.999754
Fitted	2865.45	0.999768
Fitted	2865.48	0.999781
Fitted	2865.51	0.999795
Fitted	2865.54	0.999808
Fitted	2865.57	0.99982
Fitted	2865.6	0.999833
Fitted	2865.63	0.999845
Fitted	2865.66	0.999857
Fitted	2865.69	0.999869
Fitted	2865.72	0.999881
Fitted	2865.75	0.999892
Fitted	2865.78	0.999904
Fitted	2865.81	0.999915
Fitted	2865.84	0.999926
Fitted	2865.87	0.999937
Fitted	2865.9	0.999948
Fitted	2865.93	0.999959
Fitted	2865.96	0.99997
Fitted	2865.99	0.999981
Fitted	2866.02	0.999992
Fitted	2866.05	1
Fitted	2866.08	1.00001
Fitted	2866.11	1.00002
Fitted	2866.14	1.00004
Fitted	2866.17	1.00005
Fitted	2866.2	1.00006
Fitted	2866.23	1.00007
Fitted	2866.26	1.00008
Fitted	2866.29	1.00009
Fitted	2866.32	1.0001
Fitted	2866.35	1.00011
Fitted	2866.38	1.00012
Fitted	2866.41	1.00014
Fitted	2866.44	1.00015
Fitted	2866.47	1.00016
Fitted	2866.5	1.00017
Fitted	2866.53	1.00018
Fitted	2866.56	1.0002
Fitted	2866.59	1.00021
Fitted	2866.62	1.00022
Fitted	2866.65	1.00023
Fitted	2866.68	1.00025
Fitted	2866.71	1.00026
Fitted	2866.74	1.00028
Fitted	2866.77	1.00029
Fitted	2866.8	1.0003
Fitted	2866.83	1.00032
Fitted	2866.86	1.00034
Fitted	2866.89	1.00035
Fitted	2866.92	1.00037
Fitted	2866.95	1.00038
Fitted	2866.98	1.0004
Fitted	2867.01	1.00042
Fitted	2867.04	1.00044
Fitted	2867.07	1.00046
Fitted	2867.1	1.00048
Fitted	2867.13	1.0005
Fitted	2867.16	1.00052
Fitted	2867.19	1.00054
Fitted	2867.22	1.00056
Fitted	2867.25	1.00059
Fitted	2867.28	1.00061
Fitted	2867.31	1.00064
Fitted	2867.34	1.00067
Fitted	2867.37	1.00069
Fitted	2867.4	1.00072
Fitted	2867.43	1.00075
Fitted	2867.46	1.00078
Fitted	2867.49	1.00082
Fitted	2867.52	1.00085
Fitted	2867.55	1.00089
Fitted	2867.58	1.00092
Fitted	2867.61	1.00096
Fitted	2867.64	1.001
Fitted	2867.67	1.00105
Fitted	2867.7	1.00109
Fitted	2867.73	1.00114
Fitted	2867.76	1.00119
Fitted	2867.79	1.00124
Fitted	2867.82	1.00129
Fitted	2867.85	1.00135
Fitted	2867.88	1.00141
Fitted	2867.91	1.00147
Fitted	2867.94	1.00154
Fitted	2867.97	1.00161
Fitted	2868	1.00168
Fitted	2868.03	1.00176
Fitted	2868.06	1.00184
Fitted	2868.09	1.00192
Fitted	2868.12	1.00201
Fitted	2868.15	1.0021
Fitted	2868.18	1.00219
Fitted	2868.21	1.00229
Fitted	2868.24	1.0024
Fitted	2868.27	1.0025
Fitted	2868.3	1.00261
Fitted	2868.33	1.00273
Fitted	2868.36	1.00285
Fitted	2868.39	1.00297
Fitted	2868.42	1.00309
Fitted	2868.45	1.00321
Fitted	2868.48	1.00334
Fitted	2868.51	1.00346
Fitted	2868.54	1.00358
Fitted	2868.57	1.00371
Fitted	2868.6	1.00382
Fitted	2868.63	1.00393
Fitted	2868.66	1.00404
Fitted	2868.69	1.00414
Fitted	2868.72	1.00422
Fitted	2868.75	1.0043
Fitted	2868.78	1.00436
Fitted	2868.81	1.00441
Fitted	2868.84	1.00444
Fitted	2868.87	1.00446
Fitted	2868.9	1.00446
Fitted	2868.93	1.00445
Fitted	2868.96	1.00442
Fitted	2868.99	1.00438
Fitted	2869.02	1.00432
Fitted	2869.05	1.00425
Fitted	2869.08	1.00416
Fitted	2869.11	1.00407
Fitted	2869.14	1.00397
Fitted	2869.17	1.00386
Fitted	2869.2	1.00374
Fitted	2869.23	1.00362
Fitted	2869.26	1.0035
Fitted	2869.29	1.00338
Fitted	2869.32	1.00326
Fitted	2869.35	1.00313
Fitted	2869.38	1.00301
Fitted	2869.41	1.00289
Fitted	2869.44	1.00278
Fitted	2869.47	1.00266
Fitted	2869.5	1.00255
Fitted	2869.53	1.00245
Fitted	2869.56	1.00234
Fitted	2869.59	1.00225
Fitted	2869.62	1.00215
Fitted	2869.65	1.00206
Fitted	2869.68	1.00198
Fitted	2869.71	1.00189
Fitted	2869.74	1.00181
Fitted	2869.77	1.00174
Fitted	2869.8	1.00167
Fitted	2869.83	1.0016
Fitted	2869.86	1.00153
Fitted	2869.89	1.00147
Fitted	2869.92	1.00141
Fitted	2869.95	1.00136
Fitted	2869.98	1.00131
Fitted	2870.02	1.00126
Fitted	2870.05	1.00121
Fitted	2870.08	1.00116
Fitted	2870.11	1.00112
Fitted	2870.14	1.00108
Fitted	2870.17	1.00104
Fitted	2870.2	1.001
Fitted	2870.23	1.00096
Fitted	2870.26	1.00093
Fitted	2870.29	1.0009
Fitted	2870.32	1.00087
Fitted	2870.35	1.00084
Fitted	2870.38	1.00081
Fitted	2870.41	1.00078
Fitted	2870.44	1.00076
Fitted	2870.47	1.00073
Fitted	2870.5	1.00071
Fitted	2870.53	1.00068
Fitted	2870.56	1.00066
Fitted	2870.59	1.00064
Fitted	2870.62	1.00062
Fitted	2870.65	1.0006
Fitted	2870.68	1.00059
Fitted	2870.71	1.00057
Fitted	2870.74	1.00055
Fitted	2870.77	1.00054
Fitted	2870.8	1.00052
Fitted	2870.83	1.00051
Fitted	2870.86	1.00049
Fitted	2870.89	1.00048
Fitted	2870.92	1.00046
Fitted	2870.95	1.00045
Fitted	2870.98	1.00044
Fitted	2871.01	1.00043
Fitted	2871.04	1.00042
Fitted	2871.07	1.00041
Fitted	2871.1	1.00039
Fitted	2871.13	1.00038
Fitted	2871.16	1.00037
Fitted	2871.19	1.00037
Fitted	2871.22	1.00036
Fitted	2871.25	1.00035
Fitted	2871.28	1.00034
Fitted	2871.31	1.00033
Fitted	2871.34	1.00032
Fitted	2871.37	1.00032
Fitted	2871.4	1.00031
Fitted	2871.43	1.0003
Fitted	2871.46	1.00029
Fitted	2871.49	1.00029
Fitted	2871.52	1.00028
Fitted	2871.55	1.00027
Fitted	2871.58	1.00027
Fitted	2871.61	1.00026
Fitted	2871.64	1.00026
Fitted	2871.67	1.00025
Fitted	2871.7	1.00025
Fitted	2871.73	1.00024
Fitted	2871.76	1.00023
Fitted	2871.79	1.00023
Fitted	2871.82	1.00023
Fitted	2871.85	1.00022
Fitted	2871.88	1.00022
Fitted	2871.91	1.00021
Fitted	2871.94	1.00021
Fitted	2871.97	1.0002
Fitted	2872	1.0002
Fitted	2872.03	1.0002
Fitted	2872.06	1.00019
Fitted	2872.09	1.00019
Fitted	2872.12	1.00018
Fitted	2872.15	1.00018
Fitted	2872.18	1.00018
Fitted	2872.21	1.00017
Fitted	2872.24	1.00017
Fitted	2872.27	1.00017
Fitted	2872.3	1.00016
Fitted	2872.33	1.00016
Fitted	2872.36	1.00016
Fitted	2872.39	1.00016
Fitted	2872.42	1.00015
Fitted	2872.45	1.00015
Fitted	2872.48	1.00015
Fitted	2872.51	1.00014
Fitted	2872.54	1.00014
Fitted	2872.57	1.00014
Fitted	2872.6	1.00014
Fitted	2872.63	1.00013
Fitted	2872.66	1.00013
Fitted	2872.69	1.00013
Fitted	2872.72	1.00013
Fitted	2872.75	1.00013
Fitted	2872.78	1.00012
Fitted	2872.81	1.00012
Fitted	2872.84	1.00012
Fitted	2872.87	1.00012
Fitted	2872.9	1.00012
Fitted	2872.93	1.00011
Fitted	2872.96	1.00011
Fitted	2872.99	1.00011
Fitted	2873.02	1.00011
Fitted	2873.05	1.00011
Fitted	2873.08	1.00011
Fitted	2873.11	1.0001
Fitted	2873.14	1.0001
Fitted	2873.17	1.0001
Fitted	2873.2	1.0001
Fitted	2873.23	1.0001
Fitted	2873.26	1.0001
Fitted	2873.29	1.00009
Fitted	2873.32	1.00009
Fitted	2873.35	1.00009
Fitted	2873.38	1.00009
Fitted	2873.41	1.00009
Fitted	2873.44	1.00009
Fitted	2873.47	1.00009
Fitted	2873.5	1.00009
Fitted	2873.53	1.00008
Fitted	2873.56	1.00008
Fitted	2873.59	1.00008
Fitted	2873.62	1.00008
Fitted	2873.65	1.00008
Fitted	2873.68	1.00008
Fitted	2873.71	1.00008
Fitted	2873.74	1.00008
Fitted	2873.77	1.00008
Fitted	2873.8	1.00007
Fitted	2873.83	1.00007
Fitted	2873.86	1.00007
Fitted	2873.89	1.00007
Fitted	2873.92	1.00007
Fitted	2873.95	1.00007
Fitted	2873.98	1.00007
Fitted	2874.01	1.00007
Fitted	2874.04	1.00007
Fitted	2874.07	1.00007
Fitted	2874.1	1.00007
Fitted	2874.13	1.00006
Fitted	2874.16	1.00006
Fitted	2874.19	1.00006
Fitted	2874.22	1.00006
Fitted	2874.25	1.00006
Fitted	2874.28	1.00006
Fitted	2874.31	1.00006
Fitted	2874.34	1.00006
Fitted	2874.37	1.00006
Fitted	2874.4	1.00006
Fitted	2874.43	1.00006
Fitted	2874.46	1.00006
Fitted	2874.49	1.00006
Fitted	2874.52	1.00005
Fitted	2874.55	1.00005
Fitted	2874.58	1.00005
Fitted	2874.61	1.00005
Fitted	2874.64	1.00005
Fitted	2874.67	1.00005
Fitted	2874.7	1.00005
Fitted	2874.73	1.00005
Fitted	2874.76	1.00005
Fitted	2874.79	1.00005
Fitted	2874.82	1.00005
Fitted	2874.85	1.00005
Fitted	2874.88	1.00005
Fitted	2874.91	1.00005
Fitted	2874.94	1.00005
Fitted	2874.97	1.00005
Fitted	2875	1.00005
Fitted	2875.03	1.00004
Fitted	2875.06	1.00004
Fitted	2875.09	1.00004
Fitted	2875.12	1.00004
Fitted	2875.15	1.00004
Fitted	2875.18	1.00004
Fitted	2875.21	1.00004
Fitted	2875.24	1.00004
Fitted	2875.27	1.00004
Fitted	2875.3	1.00004
Fitted	2875.33	1.00004
Fitted	2875.36	1.00004
Fitted	2875.39	1.00004
Fitted	2875.42	1.00004
Fitted	2875.45	1.00004
Fitted	2875.48	1.00004
Fitted	2875.51	1.00004
Fitted	2875.54	1.00004
Fitted	2875.57	1.00004
Fitted	2875.6	1.00004
Fitted	2875.63	1.00004
Fitted	2875.66	1.00004
Fitted	2875.69	1.00004
Fitted	2875.72	1.00004
Fitted	2875.75	1.00003
Fitted	2875.78	1.00003
Fitted	2875.81	1.00003
Fitted	2875.84	1.00003
Fitted	2875.87	1.00003
Fitted	2875.9	1.00003
Fitted	2875.93	1.00003
Fitted	2875.96	1.00003
Fitted	2875.99	1.00003
Fitted	2876.02	1.00003
Fitted	2876.05	1.00003
Fitted	2876.08	1.00003
Fitted	2876.11	1.00003
Fitted	2876.14	1.00003
Fitted	2876.17	1.00003
Fitted	2876.2	1.00003
Fitted	2876.23	1.00003
Fitted	2876.26	1.00003
Fitted	2876.29	1.00003
Fitted	2876.32	1.00003
Fitted	2876.35	1.00003
Fitted	2876.38	1.00003
Fitted	2876.41	1.00003
Fitted	2876.44	1.00003
Fitted	2876.47	1.00003
Fitted	2876.5	1.00003
Fitted	2876.53	1.00003
Fitted	2876.56	1.00003
Fitted	2876.59	1.00003
Fitted	2876.62	1.00003
Fitted	2876.65	1.00003
Fitted	2876.68	1.00003
Fitted	2876.71	1.00003
Fitted	2876.74	1.00003
Fitted	2876.77	1.00003
Fitted	2876.8	1.00002
Fitted	2876.83	1.00002
Fitted	2876.86	1.00002
Fitted	2876.89	1.00002
Fitted	2876.92	1.00002
Fitted	2876.95	1.00002
Fitted	2876.98	1.00002
Fitted	2877.01	1.00002
Fitted	2877.04	1.00002
Fitted	2877.07	1.00002
Fitted	2877.1	1.00002
Fitted	2877.13	1.00002
Fitted	2877.16	1.00002
Fitted	2877.19	1.00002
Fitted	2877.22	1.00002
Fitted	2877.25	1.00002
Fitted	2877.28	1.00002
Fitted	2877.31	1.00002
Fitted	2877.34	1.00002
Fitted	2877.37	1.00002
Fitted	2877.4	1.00002
Fitted	2877.43	1.00002
Fitted	2877.46	1.00002
Fitted	2877.49	1.00002
Fitted	2877.52	1.00002
Fitted	2877.55	1.00002
Fitted	2877.58	1.00002
Fitted	2877.61	1.00002
Fitted	2877.64	1.00002
Fitted	2877.67	1.00002
Fitted	2877.7	1.00002
Fitted	2877.73	1.00002
Fitted	2877.76	1.00002
Fitted	2877.79	1.00002
Fitted	2877.82	1.00002
Fitted	2877.85	1.00002
Fitted	2877.88	1.00002
Fitted	2877.91	1.00002
Fitted	2877.94	1.00002
Fitted	2877.97	1.00002
Fitted	2878	1.00002
Fitted	2878.03	1.00002
Fitted	2878.06	1.00002
Fitted	2878.09	1.00002
Fitted	2878.12	1.00002
Fitted	2878.15	1.00002
Fitted	2878.18	1.00002
Fitted	2878.21	1.00002
Fitted	2878.24	1.00002
Fitted	2878.27	1.00002
Fitted	2878.3	1.00002
Fitted	2878.33	1.00002
Fitted	2878.36	1.00002
Fitted	2878.39	1.00002
Fitted	2878.42	1.00002
Fitted	2878.45	1.00002
Fitted	2878.48	1.00002
Fitted	2878.51	1.00002
Fitted	2878.54	1.00002
Fitted	2878.57	1.00002
Fitted	2878.6	1.00002
Fitted	2878.63	1.00002
Fitted	2878.66	1.00001
Fitted	2878.69	1.00001
Fitted	2878.72	1.00001
Fitted	2878.75	1.00001
Fitted	2878.78	1.00001
Fitted	2878.81	1.00001
Fitted	2878.84	1.00001
Fitted	2878.87	1.00001
Fitted	2878.9	1.00001
Fitted	2878.93	1.00001
Fitted	2878.96	1.00001
Fitted	2878.99	1.00001
Fitted	2879.02	1.00001
Fitted	2879.05	1.00001
Fitted	2879.08	1.00001
Fitted	2879.11	1.00001
Fitted	2879.14	1.00001
Fitted	2879.17	1.00001
Fitted	2879.2	1.00001
Fitted	2879.23	1.00001
Fitted	2879.26	1.00001
Fitted	2879.29	1.00001
Fitted	2879.32	1.00001
Fitted	2879.35	1.00001
Fitted	2879.38	1.00001
Fitted	2879.41	1.00001
Fitted	2879.44	1.00001
Fitted	2879.47	1.00001
Fitted	2879.5	1.00001
Fitted	2879.53	1.00001
Fitted	2879.56	1.00001
Fitted	2879.59	1.00001
Fitted	2879.62	1.00001
Fitted	2879.65	1.00001
Fitted	2879.68	1.00001
Fitted	2879.71	1.00001
Fitted	2879.74	1.00001
Fitted	2879.77	1.00001
Fitted	2879.8	1.00001
Fitted	2879.83	1.00001
Fitted	2879.86	1.00001
Fitted	2879.89	1.00001
Fitted	2879.92	1.00001
Fitted	2879.95	1.00001
Fitted	2879.98	1.00001
Fitted	2880.02	1.00001
Fitted	2880.05	1.00001
Fitted	2880.08	1.00001
Fitted	2880.11	1.00001
Fitted	2880.14	1.00001
Fitted	2880.17	1.00001
Fitted	2880.2	1.00001
Fitted	2880.23	1.00001
Fitted	2880.26	1.00001
Fitted	2880.29	1.00001
Fitted	2880.32	1.00001
Fitted	2880.35	1.00001
Fitted	2880.38	1.00001
Fitted	2880.41	1.00001
Fitted	2880.44	1.00001
Fitted	2880.47	1.00001
Fitted	2880.5	1.00001
Fitted	2880.53	1.00001
Fitted	2880.56	1.00001
Fitted	2880.59	1.00001
Fitted	2880.62	1.00001
Fitted	2880.65	1.00001
Fitted	2880.68	1.00001
Fitted	2880.71	1.00001
Fitted	2880.74	1.00001
Fitted	2880.77	1.00001
Fitted	2880.8	1.00001
Fitted	2880.83	1.00001
Fitted	2880.86	1.00001
Fitted	2880.89	1.00001
Fitted	2880.92	1.00001
Fitted	2880.95	1.00001
Fitted	2880.98	1.00001
Fitted	2881.01	1.00001
Fitted	2881.04	1.00001
Fitted	2881.07	1.00001
Fitted	2881.1	1.00001
Fitted	2881.13	1.00001
Fitted	2881.16	1.00001
Fitted	2881.19	1.00001
Fitted	2881.22	1.00001
Fitted	2881.25	1.00001
Fitted	2881.28	1.00001
Fitted	2881.31	1.00001
Fitted	2881.34	1.00001
Fitted	2881.37	1.00001
Fitted	2881.4	1.00001
Fitted	2881.43	1.00001
Fitted	2881.46	1.00001
Fitted	2881.49	1.00001
Fitted	2881.52	1.00001
Fitted	2881.55	1.00001
Fitted	2881.58	1.00001
Fitted	2881.61	1.00001
Fitted	2881.64	1.00001
Fitted	2881.67	1.00001
Fitted	2881.7	1.00001
Fitted	2881.73	1.00001
Fitted	2881.76	1.00001
Fitted	2881.79	1.00001
Fitted	2881.82	1.00001
Fitted	2881.85	1.00001
Fitted	2881.88	1.00001
Fitted	2881.91	1.00001
Fitted	2881.94	1.00001
Fitted	2881.97	1.00001
Fitted	2882	1.00001
Fitted	2882.03	1.00001
Fitted	2882.06	1.00001
Fitted	2882.09	1.00001
Fitted	2882.12	1.00001
Fitted	2882.15	1.00001
Fitted	2882.18	1.00001
Fitted	2882.21	1.00001
Fitted	2882.24	1.00001
Fitted	2882.27	1.00001
Fitted	2882.3	1.00001
Fitted	2882.33	1.00001
Fitted	2882.36	1.00001
Fitted	2882.39	1.00001
Fitted	2882.42	1.00001
Fitted	2882.45	1.00001
Fitted	2882.48	1.00001
Fitted	2882.51	1.00001
Fitted	2882.54	1.00001
Fitted	2882.57	1.00001
Fitted	2882.6	1.00001
Fitted	2882.63	1.00001
Fitted	2882.66	1.00001
Fitted	2882.69	1.00001
Fitted	2882.72	1.00001
Fitted	2882.75	1.00001
Fitted	2882.78	1.00001
Fitted	2882.81	1.00001
Fitted	2882.84	1.00001
Fitted	2882.87	1.00001
Fitted	2882.9	1.00001
Fitted	2882.93	1.00001
Fitted	2882.96	1.00001
Fitted	2882.99	1.00001
Fitted	2883.02	1.00001
Fitted	2883.05	1.00001
Fitted	2883.08	1.00001
Fitted	2883.11	1.00001
Fitted	2883.14	1.00001
Fitted	2883.17	1.00001
Fitted	2883.2	1.00001
Fitted	2883.23	1.00001
Fitted	2883.26	1.00001
Fitted	2883.29	1.00001
Fitted	2883.32	1.00001
Fitted	2883.35	1.00001
Fitted	2883.38	1.00001
Fitted	2883.41	1.00001
Fitted	2883.44	1.00001
Fitted	2883.47	1.00001
Fitted	2883.5	1.00001
Fitted	2883.53	1.00001
Fitted	2883.56	1.00001
Fitted	2883.59	1.00001
Fitted	2883.62	1.00001
Fitted	2883.65	1.00001
Fitted	2883.68	1.00001
Fitted	2883.71	1.00001
Fitted	2883.74	1.00001
Fitted	2883.77	1.00001
Fitted	2883.8	1.00001
Fitted	2883.83	1.00001
Fitted	2883.86	1.00001
Fitted	2883.89	1.00001
Fitted	2883.92	1.00001
Fitted	2883.95	1.00001
Fitted	2883.98	1.00001
Fitted	2884.01	1.00001
Fitted	2884.04	1.00001
Fitted	2884.07	1.00001
Fitted	2884.1	1.00001
Fitted	2884.13	1
Fitted	2884.16	1
Fitted	2884.19	1
Fitted	2884.22	1
Fitted	2884.25	1
Fitted	2884.28	1
Fitted	2884.31	1
Fitted	2884.34	1
Fitted	2884.37	1
Fitted	2884.4	1
Fitted	2884.43	1
Fitted	2884.46	1
Fitted	2884.49	1
Fitted	2884.52	1
Fitted	2884.55	1
Fitted	2884.58	1
Fitted	2884.61	1
Fitted	2884.64	1
Fitted	2884.67	1
Fitted	2884.7	1
Fitted	2884.73	1
Fitted	2884.76	1
Fitted	2884.79	1
Fitted	2884.82	1
Fitted	2884.85	1
Fitted	2884.88	1
Fitted	2884.91	1
Fitted	2884.94	1
Fitted	2884.97	1
Fitted	2885	1

## Sheet: Fig4DK
Data_type	Frequency	Intensity
Measured	2855	0.996385
Measured	2855.07	0.991444
Measured	2855.15	0.98703
Measured	2855.22	0.993077
Measured	2855.3	0.99083
Measured	2855.38	0.991515
Measured	2855.45	0.992153
Measured	2855.53	0.9897
Measured	2855.6	0.990795
Measured	2855.68	0.991852
Measured	2855.75	0.992445
Measured	2855.82	0.99155
Measured	2855.9	0.994925
Measured	2855.97	0.99319
Measured	2856.05	0.992212
Measured	2856.12	0.9905
Measured	2856.2	0.98216
Measured	2856.28	0.992223
Measured	2856.35	0.991082
Measured	2856.43	0.990578
Measured	2856.5	0.989232
Measured	2856.57	0.982337
Measured	2856.65	0.994029
Measured	2856.72	0.991197
Measured	2856.8	0.981177
Measured	2856.88	0.982676
Measured	2856.95	0.989706
Measured	2857.03	0.986245
Measured	2857.1	0.988751
Measured	2857.18	0.987012
Measured	2857.25	0.987146
Measured	2857.32	0.986738
Measured	2857.4	0.986687
Measured	2857.47	0.988075
Measured	2857.55	0.989894
Measured	2857.62	0.988123
Measured	2857.7	0.988453
Measured	2857.78	0.990017
Measured	2857.85	0.990427
Measured	2857.93	0.98809
Measured	2858	0.990636
Measured	2858.07	0.978489
Measured	2858.15	0.985615
Measured	2858.22	0.986142
Measured	2858.3	0.988043
Measured	2858.38	0.986761
Measured	2858.45	0.984557
Measured	2858.53	0.983721
Measured	2858.6	0.979894
Measured	2858.68	0.979137
Measured	2858.75	0.98527
Measured	2858.82	0.985078
Measured	2858.9	0.982769
Measured	2858.97	0.982402
Measured	2859.05	0.983574
Measured	2859.12	0.984276
Measured	2859.2	0.983012
Measured	2859.28	0.98367
Measured	2859.35	0.982458
Measured	2859.43	0.982672
Measured	2859.5	0.986814
Measured	2859.57	0.985747
Measured	2859.65	0.984379
Measured	2859.72	0.985544
Measured	2859.8	0.986018
Measured	2859.88	0.983563
Measured	2859.95	0.977886
Measured	2860.03	0.981778
Measured	2860.1	0.982246
Measured	2860.18	0.984151
Measured	2860.25	0.982124
Measured	2860.32	0.979868
Measured	2860.4	0.983213
Measured	2860.47	0.978377
Measured	2860.55	0.96955
Measured	2860.62	0.980907
Measured	2860.7	0.979776
Measured	2860.78	0.980193
Measured	2860.85	0.979482
Measured	2860.93	0.98077
Measured	2861	0.980761
Measured	2861.07	0.977684
Measured	2861.15	0.978889
Measured	2861.22	0.980526
Measured	2861.3	0.97941
Measured	2861.38	0.979736
Measured	2861.45	0.979281
Measured	2861.53	0.978784
Measured	2861.6	0.981048
Measured	2861.68	0.976991
Measured	2861.75	0.975289
Measured	2861.82	0.978071
Measured	2861.9	0.978297
Measured	2861.97	0.9753
Measured	2862.05	0.983553
Measured	2862.12	0.979258
Measured	2862.2	0.979195
Measured	2862.28	0.972474
Measured	2862.35	0.973514
Measured	2862.43	0.9706
Measured	2862.5	0.977028
Measured	2862.57	0.975018
Measured	2862.65	0.974902
Measured	2862.72	0.974037
Measured	2862.8	0.97537
Measured	2862.88	0.974868
Measured	2862.95	0.974175
Measured	2863.03	0.973057
Measured	2863.1	0.974558
Measured	2863.18	0.973329
Measured	2863.25	0.974267
Measured	2863.32	0.976767
Measured	2863.4	0.975417
Measured	2863.47	0.977295
Measured	2863.55	0.975477
Measured	2863.62	0.966449
Measured	2863.7	0.976066
Measured	2863.78	0.976749
Measured	2863.85	0.977028
Measured	2863.93	0.971398
Measured	2864	0.9766
Measured	2864.07	0.973664
Measured	2864.15	0.972935
Measured	2864.22	0.962266
Measured	2864.3	0.972636
Measured	2864.38	0.969434
Measured	2864.45	0.969989
Measured	2864.53	0.971811
Measured	2864.6	0.970987
Measured	2864.68	0.97047
Measured	2864.75	0.973229
Measured	2864.82	0.971494
Measured	2864.9	0.970166
Measured	2864.97	0.97197
Measured	2865.05	0.969985
Measured	2865.12	0.973442
Measured	2865.2	0.974558
Measured	2865.28	0.972817
Measured	2865.35	0.973422
Measured	2865.43	0.975597
Measured	2865.5	0.973982
Measured	2865.57	0.977952
Measured	2865.65	0.969736
Measured	2865.72	0.969211
Measured	2865.8	0.974753
Measured	2865.88	0.974228
Measured	2865.95	0.97518
Measured	2866.03	0.970386
Measured	2866.1	0.975804
Measured	2866.18	0.962189
Measured	2866.25	0.97394
Measured	2866.32	0.972052
Measured	2866.4	0.973248
Measured	2866.47	0.973927
Measured	2866.55	0.973017
Measured	2866.62	0.973185
Measured	2866.7	0.97388
Measured	2866.78	0.97525
Measured	2866.85	0.975845
Measured	2866.93	0.975833
Measured	2867	0.974917
Measured	2867.07	0.975921
Measured	2867.15	0.977026
Measured	2867.22	0.979327
Measured	2867.3	0.980958
Measured	2867.38	0.978202
Measured	2867.45	0.977472
Measured	2867.53	0.973439
Measured	2867.6	0.981101
Measured	2867.68	0.97619
Measured	2867.75	0.981898
Measured	2867.82	0.977966
Measured	2867.9	0.976526
Measured	2867.97	0.981111
Measured	2868.05	0.976158
Measured	2868.12	0.980072
Measured	2868.2	0.9747
Measured	2868.28	0.981565
Measured	2868.35	0.980494
Measured	2868.43	0.981124
Measured	2868.5	0.981585
Measured	2868.57	0.983047
Measured	2868.65	0.982396
Measured	2868.72	0.982836
Measured	2868.8	0.982192
Measured	2868.88	0.9816
Measured	2868.95	0.985806
Measured	2869.03	0.984806
Measured	2869.1	0.983345
Measured	2869.18	0.985119
Measured	2869.25	0.982538
Measured	2869.32	0.987225
Measured	2869.4	0.988019
Measured	2869.47	0.982764
Measured	2869.55	0.979903
Measured	2869.62	0.989005
Measured	2869.7	0.984566
Measured	2869.78	0.977882
Measured	2869.85	0.98822
Measured	2869.93	0.977058
Measured	2870	0.974599
Measured	2870.07	0.983338
Measured	2870.15	0.981475
Measured	2870.22	0.982859
Measured	2870.3	0.982872
Measured	2870.38	0.980768
Measured	2870.45	0.980223
Measured	2870.53	0.979901
Measured	2870.6	0.98117
Measured	2870.68	0.980505
Measured	2870.75	0.978139
Measured	2870.82	0.979099
Measured	2870.9	0.980671
Measured	2870.97	0.980867
Measured	2871.05	0.983127
Measured	2871.12	0.980338
Measured	2871.2	0.978692
Measured	2871.28	0.97288
Measured	2871.35	0.971834
Measured	2871.43	0.982048
Measured	2871.5	0.983381
Measured	2871.57	0.97994
Measured	2871.65	0.978174
Measured	2871.72	0.972113
Measured	2871.8	0.972456
Measured	2871.88	0.973002
Measured	2871.95	0.971674
Measured	2872.03	0.975951
Measured	2872.1	0.974686
Measured	2872.18	0.975048
Measured	2872.25	0.973608
Measured	2872.32	0.975247
Measured	2872.4	0.974847
Measured	2872.47	0.973196
Measured	2872.55	0.972506
Measured	2872.62	0.975249
Measured	2872.7	0.976238
Measured	2872.78	0.975521
Measured	2872.85	0.976151
Measured	2872.93	0.976498
Measured	2873	0.977078
Measured	2873.07	0.976537
Measured	2873.15	0.974709
Measured	2873.22	0.971813
Measured	2873.3	0.974401
Measured	2873.38	0.977158
Measured	2873.45	0.977832
Measured	2873.53	0.969705
Measured	2873.6	0.975799
Measured	2873.68	0.97422
Measured	2873.75	0.965084
Measured	2873.82	0.976208
Measured	2873.9	0.970527
Measured	2873.97	0.973986
Measured	2874.05	0.976586
Measured	2874.12	0.974322
Measured	2874.2	0.974267
Measured	2874.28	0.973899
Measured	2874.35	0.973969
Measured	2874.43	0.975184
Measured	2874.5	0.975211
Measured	2874.57	0.975536
Measured	2874.65	0.977048
Measured	2874.72	0.975307
Measured	2874.8	0.979702
Measured	2874.88	0.981244
Measured	2874.95	0.978362
Measured	2875.03	0.973449
Measured	2875.1	0.976834
Measured	2875.18	0.974035
Measured	2875.25	0.979387
Measured	2875.32	0.979538
Measured	2875.4	0.979927
Measured	2875.47	0.977727
Measured	2875.55	0.965824
Measured	2875.62	0.974092
Measured	2875.7	0.977496
Measured	2875.78	0.978158
Measured	2875.85	0.976181
Measured	2875.93	0.976252
Measured	2876	0.977474
Measured	2876.07	0.978255
Measured	2876.15	0.98029
Measured	2876.22	0.978804
Measured	2876.3	0.978835
Measured	2876.38	0.978553
Measured	2876.45	0.979159
Measured	2876.53	0.98068
Measured	2876.6	0.984772
Measured	2876.68	0.981754
Measured	2876.75	0.980715
Measured	2876.82	0.98167
Measured	2876.9	0.978547
Measured	2876.97	0.983782
Measured	2877.05	0.978497
Measured	2877.12	0.982134
Measured	2877.2	0.983081
Measured	2877.28	0.983483
Measured	2877.35	0.979253
Measured	2877.43	0.975131
Measured	2877.5	0.983722
Measured	2877.57	0.978404
Measured	2877.65	0.97738
Measured	2877.72	0.983859
Measured	2877.8	0.982924
Measured	2877.88	0.983739
Measured	2877.95	0.982624
Measured	2878.03	0.982546
Measured	2878.1	0.983052
Measured	2878.18	0.983202
Measured	2878.25	0.983995
Measured	2878.32	0.985824
Measured	2878.4	0.985488
Measured	2878.47	0.986473
Measured	2878.55	0.985821
Measured	2878.62	0.987364
Measured	2878.7	0.988551
Measured	2878.78	0.985906
Measured	2878.85	0.981543
Measured	2878.93	0.985853
Measured	2879	0.985407
Measured	2879.07	0.991088
Measured	2879.15	0.989294
Measured	2879.22	0.980462
Measured	2879.3	0.98174
Measured	2879.38	0.985484
Measured	2879.45	0.980232
Measured	2879.53	0.990102
Measured	2879.6	0.98627
Measured	2879.68	0.985493
Measured	2879.75	0.986322
Measured	2879.82	0.98558
Measured	2879.9	0.988102
Measured	2879.97	0.98721
Measured	2880.05	0.988927
Measured	2880.12	0.986021
Measured	2880.2	0.988992
Measured	2880.28	0.989239
Measured	2880.35	0.990166
Measured	2880.43	0.99
Measured	2880.5	0.991697
Measured	2880.57	0.989902
Measured	2880.65	0.987954
Measured	2880.72	0.989591
Measured	2880.8	0.991678
Measured	2880.88	0.99645
Measured	2880.95	0.991666
Measured	2881.03	0.986787
Measured	2881.1	0.991297
Measured	2881.18	0.980309
Measured	2881.25	0.993932
Measured	2881.32	0.992992
Measured	2881.4	0.988592
Measured	2881.47	0.984275
Measured	2881.55	0.988781
Measured	2881.62	0.990775
Measured	2881.7	0.991898
Measured	2881.78	0.992741
Measured	2881.85	0.992576
Measured	2881.93	0.992153
Measured	2882	0.993493
Measured	2882.07	0.992102
Measured	2882.15	0.994004
Measured	2882.22	0.993054
Measured	2882.3	0.992018
Measured	2882.38	0.995214
Measured	2882.45	0.99574
Measured	2882.53	0.994606
Measured	2882.6	0.991073
Measured	2882.68	0.99591
Measured	2882.75	0.994165
Measured	2882.82	0.99186
Measured	2882.9	0.99357
Measured	2882.97	0.99161
Measured	2883.05	0.990572
Measured	2883.12	0.992589
Measured	2883.2	0.993257
Measured	2883.28	0.993161
Measured	2883.35	0.988294
Measured	2883.43	0.993661
Measured	2883.5	0.991575
Measured	2883.57	0.993053
Measured	2883.65	0.993252
Measured	2883.72	0.995155
Measured	2883.8	0.995474
Measured	2883.88	0.994134
Measured	2883.95	0.995148
Measured	2884.03	0.994642
Measured	2884.1	0.994534
Measured	2884.18	0.997021
Measured	2884.25	0.99632
Measured	2884.32	0.996822
Measured	2884.4	0.991644
Measured	2884.47	0.998023
Measured	2884.55	0.998038
Measured	2884.62	0.996643
Measured	2884.7	0.998475
Measured	2884.78	0.993735
Measured	2884.85	0.997155
Fitted	2855	0.992649
Fitted	2855.03	0.992614
Fitted	2855.06	0.992579
Fitted	2855.09	0.992543
Fitted	2855.12	0.992507
Fitted	2855.15	0.992471
Fitted	2855.18	0.992434
Fitted	2855.21	0.992397
Fitted	2855.24	0.99236
Fitted	2855.27	0.992323
Fitted	2855.3	0.992286
Fitted	2855.33	0.992248
Fitted	2855.36	0.99221
Fitted	2855.39	0.992172
Fitted	2855.42	0.992133
Fitted	2855.45	0.992095
Fitted	2855.48	0.992056
Fitted	2855.51	0.992016
Fitted	2855.54	0.991977
Fitted	2855.57	0.991937
Fitted	2855.6	0.991897
Fitted	2855.63	0.991857
Fitted	2855.66	0.991816
Fitted	2855.69	0.991775
Fitted	2855.72	0.991734
Fitted	2855.75	0.991693
Fitted	2855.78	0.991651
Fitted	2855.81	0.991609
Fitted	2855.84	0.991567
Fitted	2855.87	0.991524
Fitted	2855.9	0.991481
Fitted	2855.93	0.991438
Fitted	2855.96	0.991395
Fitted	2855.99	0.991351
Fitted	2856.02	0.991307
Fitted	2856.05	0.991263
Fitted	2856.08	0.991218
Fitted	2856.11	0.991173
Fitted	2856.14	0.991128
Fitted	2856.17	0.991082
Fitted	2856.2	0.991036
Fitted	2856.23	0.99099
Fitted	2856.26	0.990944
Fitted	2856.29	0.990897
Fitted	2856.32	0.99085
Fitted	2856.35	0.990803
Fitted	2856.38	0.990755
Fitted	2856.41	0.990707
Fitted	2856.44	0.990658
Fitted	2856.47	0.99061
Fitted	2856.5	0.99056
Fitted	2856.53	0.990511
Fitted	2856.56	0.990461
Fitted	2856.59	0.990411
Fitted	2856.62	0.990361
Fitted	2856.65	0.99031
Fitted	2856.68	0.990259
Fitted	2856.71	0.990208
Fitted	2856.74	0.990156
Fitted	2856.77	0.990104
Fitted	2856.8	0.990051
Fitted	2856.83	0.989998
Fitted	2856.86	0.989945
Fitted	2856.89	0.989891
Fitted	2856.92	0.989837
Fitted	2856.95	0.989783
Fitted	2856.98	0.989728
Fitted	2857.01	0.989673
Fitted	2857.04	0.989618
Fitted	2857.07	0.989562
Fitted	2857.1	0.989506
Fitted	2857.13	0.989449
Fitted	2857.16	0.989392
Fitted	2857.19	0.989335
Fitted	2857.22	0.989277
Fitted	2857.25	0.989219
Fitted	2857.28	0.989161
Fitted	2857.31	0.989102
Fitted	2857.34	0.989043
Fitted	2857.37	0.988983
Fitted	2857.4	0.988923
Fitted	2857.43	0.988862
Fitted	2857.46	0.988802
Fitted	2857.49	0.98874
Fitted	2857.52	0.988679
Fitted	2857.55	0.988616
Fitted	2857.58	0.988554
Fitted	2857.61	0.988491
Fitted	2857.64	0.988428
Fitted	2857.67	0.988364
Fitted	2857.7	0.9883
Fitted	2857.73	0.988235
Fitted	2857.76	0.98817
Fitted	2857.79	0.988105
Fitted	2857.82	0.988039
Fitted	2857.85	0.987973
Fitted	2857.88	0.987906
Fitted	2857.91	0.987839
Fitted	2857.94	0.987771
Fitted	2857.97	0.987703
Fitted	2858	0.987635
Fitted	2858.03	0.987566
Fitted	2858.06	0.987496
Fitted	2858.09	0.987427
Fitted	2858.12	0.987356
Fitted	2858.15	0.987286
Fitted	2858.18	0.987215
Fitted	2858.21	0.987143
Fitted	2858.24	0.987071
Fitted	2858.27	0.986999
Fitted	2858.3	0.986926
Fitted	2858.33	0.986852
Fitted	2858.36	0.986779
Fitted	2858.39	0.986704
Fitted	2858.42	0.98663
Fitted	2858.45	0.986555
Fitted	2858.48	0.986479
Fitted	2858.51	0.986403
Fitted	2858.54	0.986326
Fitted	2858.57	0.986249
Fitted	2858.6	0.986172
Fitted	2858.63	0.986094
Fitted	2858.66	0.986016
Fitted	2858.69	0.985937
Fitted	2858.72	0.985858
Fitted	2858.75	0.985778
Fitted	2858.78	0.985698
Fitted	2858.81	0.985617
Fitted	2858.84	0.985536
Fitted	2858.87	0.985455
Fitted	2858.9	0.985373
Fitted	2858.93	0.98529
Fitted	2858.96	0.985207
Fitted	2858.99	0.985124
Fitted	2859.02	0.98504
Fitted	2859.05	0.984956
Fitted	2859.08	0.984871
Fitted	2859.11	0.984786
Fitted	2859.14	0.9847
Fitted	2859.17	0.984614
Fitted	2859.2	0.984528
Fitted	2859.23	0.984441
Fitted	2859.26	0.984354
Fitted	2859.29	0.984266
Fitted	2859.32	0.984178
Fitted	2859.35	0.984089
Fitted	2859.38	0.984
Fitted	2859.41	0.983911
Fitted	2859.44	0.983821
Fitted	2859.47	0.98373
Fitted	2859.5	0.98364
Fitted	2859.53	0.983549
Fitted	2859.56	0.983457
Fitted	2859.59	0.983365
Fitted	2859.62	0.983273
Fitted	2859.65	0.98318
Fitted	2859.68	0.983087
Fitted	2859.71	0.982993
Fitted	2859.74	0.982899
Fitted	2859.77	0.982805
Fitted	2859.8	0.982711
Fitted	2859.83	0.982616
Fitted	2859.86	0.98252
Fitted	2859.89	0.982425
Fitted	2859.92	0.982329
Fitted	2859.95	0.982232
Fitted	2859.98	0.982136
Fitted	2860.02	0.982039
Fitted	2860.05	0.981941
Fitted	2860.08	0.981844
Fitted	2860.11	0.981746
Fitted	2860.14	0.981648
Fitted	2860.17	0.981549
Fitted	2860.2	0.98145
Fitted	2860.23	0.981351
Fitted	2860.26	0.981252
Fitted	2860.29	0.981153
Fitted	2860.32	0.981053
Fitted	2860.35	0.980953
Fitted	2860.38	0.980853
Fitted	2860.41	0.980753
Fitted	2860.44	0.980652
Fitted	2860.47	0.980551
Fitted	2860.5	0.98045
Fitted	2860.53	0.980349
Fitted	2860.56	0.980248
Fitted	2860.59	0.980147
Fitted	2860.62	0.980045
Fitted	2860.65	0.979944
Fitted	2860.68	0.979842
Fitted	2860.71	0.97974
Fitted	2860.74	0.979639
Fitted	2860.77	0.979537
Fitted	2860.8	0.979435
Fitted	2860.83	0.979333
Fitted	2860.86	0.979231
Fitted	2860.89	0.979129
Fitted	2860.92	0.979027
Fitted	2860.95	0.978926
Fitted	2860.98	0.978824
Fitted	2861.01	0.978722
Fitted	2861.04	0.978621
Fitted	2861.07	0.978519
Fitted	2861.1	0.978418
Fitted	2861.13	0.978317
Fitted	2861.16	0.978216
Fitted	2861.19	0.978115
Fitted	2861.22	0.978014
Fitted	2861.25	0.977914
Fitted	2861.28	0.977813
Fitted	2861.31	0.977714
Fitted	2861.34	0.977614
Fitted	2861.37	0.977515
Fitted	2861.4	0.977416
Fitted	2861.43	0.977317
Fitted	2861.46	0.977219
Fitted	2861.49	0.977121
Fitted	2861.52	0.977023
Fitted	2861.55	0.976926
Fitted	2861.58	0.976829
Fitted	2861.61	0.976733
Fitted	2861.64	0.976637
Fitted	2861.67	0.976542
Fitted	2861.7	0.976447
Fitted	2861.73	0.976353
Fitted	2861.76	0.97626
Fitted	2861.79	0.976167
Fitted	2861.82	0.976074
Fitted	2861.85	0.975983
Fitted	2861.88	0.975892
Fitted	2861.91	0.975801
Fitted	2861.94	0.975712
Fitted	2861.97	0.975623
Fitted	2862	0.975535
Fitted	2862.03	0.975448
Fitted	2862.06	0.975361
Fitted	2862.09	0.975275
Fitted	2862.12	0.975191
Fitted	2862.15	0.975107
Fitted	2862.18	0.975024
Fitted	2862.21	0.974941
Fitted	2862.24	0.97486
Fitted	2862.27	0.97478
Fitted	2862.3	0.974701
Fitted	2862.33	0.974623
Fitted	2862.36	0.974545
Fitted	2862.39	0.974469
Fitted	2862.42	0.974394
Fitted	2862.45	0.97432
Fitted	2862.48	0.974248
Fitted	2862.51	0.974176
Fitted	2862.54	0.974105
Fitted	2862.57	0.974036
Fitted	2862.6	0.973968
Fitted	2862.63	0.973901
Fitted	2862.66	0.973835
Fitted	2862.69	0.973771
Fitted	2862.72	0.973708
Fitted	2862.75	0.973646
Fitted	2862.78	0.973586
Fitted	2862.81	0.973527
Fitted	2862.84	0.973469
Fitted	2862.87	0.973412
Fitted	2862.9	0.973357
Fitted	2862.93	0.973304
Fitted	2862.96	0.973252
Fitted	2862.99	0.973201
Fitted	2863.02	0.973151
Fitted	2863.05	0.973104
Fitted	2863.08	0.973057
Fitted	2863.11	0.973012
Fitted	2863.14	0.972969
Fitted	2863.17	0.972927
Fitted	2863.2	0.972887
Fitted	2863.23	0.972848
Fitted	2863.26	0.972811
Fitted	2863.29	0.972775
Fitted	2863.32	0.972741
Fitted	2863.35	0.972708
Fitted	2863.38	0.972677
Fitted	2863.41	0.972647
Fitted	2863.44	0.972619
Fitted	2863.47	0.972593
Fitted	2863.5	0.972568
Fitted	2863.53	0.972545
Fitted	2863.56	0.972524
Fitted	2863.59	0.972504
Fitted	2863.62	0.972485
Fitted	2863.65	0.972469
Fitted	2863.68	0.972453
Fitted	2863.71	0.97244
Fitted	2863.74	0.972428
Fitted	2863.77	0.972418
Fitted	2863.8	0.972409
Fitted	2863.83	0.972402
Fitted	2863.86	0.972396
Fitted	2863.89	0.972392
Fitted	2863.92	0.972389
Fitted	2863.95	0.972388
Fitted	2863.98	0.972389
Fitted	2864.01	0.972391
Fitted	2864.04	0.972395
Fitted	2864.07	0.9724
Fitted	2864.1	0.972407
Fitted	2864.13	0.972415
Fitted	2864.16	0.972425
Fitted	2864.19	0.972436
Fitted	2864.22	0.972449
Fitted	2864.25	0.972463
Fitted	2864.28	0.972478
Fitted	2864.31	0.972495
Fitted	2864.34	0.972514
Fitted	2864.37	0.972534
Fitted	2864.4	0.972555
Fitted	2864.43	0.972577
Fitted	2864.46	0.972601
Fitted	2864.49	0.972626
Fitted	2864.52	0.972653
Fitted	2864.55	0.972681
Fitted	2864.58	0.97271
Fitted	2864.61	0.97274
Fitted	2864.64	0.972772
Fitted	2864.67	0.972804
Fitted	2864.7	0.972838
Fitted	2864.73	0.972873
Fitted	2864.76	0.972909
Fitted	2864.79	0.972947
Fitted	2864.82	0.972985
Fitted	2864.85	0.973025
Fitted	2864.88	0.973065
Fitted	2864.91	0.973107
Fitted	2864.94	0.973149
Fitted	2864.97	0.973193
Fitted	2865	0.973238
Fitted	2865.03	0.973283
Fitted	2865.06	0.973329
Fitted	2865.09	0.973377
Fitted	2865.12	0.973425
Fitted	2865.15	0.973474
Fitted	2865.18	0.973524
Fitted	2865.21	0.973574
Fitted	2865.24	0.973625
Fitted	2865.27	0.973677
Fitted	2865.3	0.97373
Fitted	2865.33	0.973784
Fitted	2865.36	0.973838
Fitted	2865.39	0.973893
Fitted	2865.42	0.973948
Fitted	2865.45	0.974004
Fitted	2865.48	0.97406
Fitted	2865.51	0.974117
Fitted	2865.54	0.974175
Fitted	2865.57	0.974233
Fitted	2865.6	0.974292
Fitted	2865.63	0.974351
Fitted	2865.66	0.97441
Fitted	2865.69	0.97447
Fitted	2865.72	0.97453
Fitted	2865.75	0.97459
Fitted	2865.78	0.974651
Fitted	2865.81	0.974712
Fitted	2865.84	0.974774
Fitted	2865.87	0.974835
Fitted	2865.9	0.974897
Fitted	2865.93	0.974959
Fitted	2865.96	0.975022
Fitted	2865.99	0.975084
Fitted	2866.02	0.975147
Fitted	2866.05	0.975209
Fitted	2866.08	0.975272
Fitted	2866.11	0.975335
Fitted	2866.14	0.975398
Fitted	2866.17	0.975461
Fitted	2866.2	0.975524
Fitted	2866.23	0.975587
Fitted	2866.26	0.97565
Fitted	2866.29	0.975713
Fitted	2866.32	0.975776
Fitted	2866.35	0.975839
Fitted	2866.38	0.975901
Fitted	2866.41	0.975964
Fitted	2866.44	0.976026
Fitted	2866.47	0.976089
Fitted	2866.5	0.976151
Fitted	2866.53	0.976213
Fitted	2866.56	0.976274
Fitted	2866.59	0.976336
Fitted	2866.62	0.976397
Fitted	2866.65	0.976458
Fitted	2866.68	0.976519
Fitted	2866.71	0.976579
Fitted	2866.74	0.976639
Fitted	2866.77	0.976699
Fitted	2866.8	0.976759
Fitted	2866.83	0.976818
Fitted	2866.86	0.976877
Fitted	2866.89	0.976935
Fitted	2866.92	0.976993
Fitted	2866.95	0.977051
Fitted	2866.98	0.977108
Fitted	2867.01	0.977165
Fitted	2867.04	0.977222
Fitted	2867.07	0.977278
Fitted	2867.1	0.977333
Fitted	2867.13	0.977388
Fitted	2867.16	0.977443
Fitted	2867.19	0.977497
Fitted	2867.22	0.97755
Fitted	2867.25	0.977603
Fitted	2867.28	0.977656
Fitted	2867.31	0.977708
Fitted	2867.34	0.97776
Fitted	2867.37	0.97781
Fitted	2867.4	0.977861
Fitted	2867.43	0.977911
Fitted	2867.46	0.97796
Fitted	2867.49	0.978009
Fitted	2867.52	0.978057
Fitted	2867.55	0.978104
Fitted	2867.58	0.978151
Fitted	2867.61	0.978197
Fitted	2867.64	0.978243
Fitted	2867.67	0.978288
Fitted	2867.7	0.978332
Fitted	2867.73	0.978376
Fitted	2867.76	0.978419
Fitted	2867.79	0.978461
Fitted	2867.82	0.978503
Fitted	2867.85	0.978544
Fitted	2867.88	0.978585
Fitted	2867.91	0.978624
Fitted	2867.94	0.978663
Fitted	2867.97	0.978702
Fitted	2868	0.978739
Fitted	2868.03	0.978776
Fitted	2868.06	0.978813
Fitted	2868.09	0.978848
Fitted	2868.12	0.978883
Fitted	2868.15	0.978917
Fitted	2868.18	0.978951
Fitted	2868.21	0.978983
Fitted	2868.24	0.979015
Fitted	2868.27	0.979046
Fitted	2868.3	0.979077
Fitted	2868.33	0.979107
Fitted	2868.36	0.979136
Fitted	2868.39	0.979164
Fitted	2868.42	0.979192
Fitted	2868.45	0.979218
Fitted	2868.48	0.979244
Fitted	2868.51	0.97927
Fitted	2868.54	0.979294
Fitted	2868.57	0.979318
Fitted	2868.6	0.979341
Fitted	2868.63	0.979363
Fitted	2868.66	0.979385
Fitted	2868.69	0.979406
Fitted	2868.72	0.979426
Fitted	2868.75	0.979445
Fitted	2868.78	0.979463
Fitted	2868.81	0.979481
Fitted	2868.84	0.979498
Fitted	2868.87	0.979514
Fitted	2868.9	0.979529
Fitted	2868.93	0.979544
Fitted	2868.96	0.979558
Fitted	2868.99	0.979571
Fitted	2869.02	0.979583
Fitted	2869.05	0.979595
Fitted	2869.08	0.979605
Fitted	2869.11	0.979615
Fitted	2869.14	0.979624
Fitted	2869.17	0.979633
Fitted	2869.2	0.979641
Fitted	2869.23	0.979647
Fitted	2869.26	0.979653
Fitted	2869.29	0.979659
Fitted	2869.32	0.979663
Fitted	2869.35	0.979667
Fitted	2869.38	0.97967
Fitted	2869.41	0.979672
Fitted	2869.44	0.979674
Fitted	2869.47	0.979675
Fitted	2869.5	0.979674
Fitted	2869.53	0.979674
Fitted	2869.56	0.979672
Fitted	2869.59	0.97967
Fitted	2869.62	0.979667
Fitted	2869.65	0.979663
Fitted	2869.68	0.979658
Fitted	2869.71	0.979653
Fitted	2869.74	0.979647
Fitted	2869.77	0.97964
Fitted	2869.8	0.979632
Fitted	2869.83	0.979624
Fitted	2869.86	0.979615
Fitted	2869.89	0.979605
Fitted	2869.92	0.979594
Fitted	2869.95	0.979583
Fitted	2869.98	0.979571
Fitted	2870.02	0.979558
Fitted	2870.05	0.979545
Fitted	2870.08	0.97953
Fitted	2870.11	0.979515
Fitted	2870.14	0.9795
Fitted	2870.17	0.979483
Fitted	2870.2	0.979466
Fitted	2870.23	0.979449
Fitted	2870.26	0.97943
Fitted	2870.29	0.979411
Fitted	2870.32	0.979391
Fitted	2870.35	0.979371
Fitted	2870.38	0.97935
Fitted	2870.41	0.979328
Fitted	2870.44	0.979305
Fitted	2870.47	0.979282
Fitted	2870.5	0.979258
Fitted	2870.53	0.979234
Fitted	2870.56	0.979209
Fitted	2870.59	0.979183
Fitted	2870.62	0.979156
Fitted	2870.65	0.979129
Fitted	2870.68	0.979102
Fitted	2870.71	0.979074
Fitted	2870.74	0.979045
Fitted	2870.77	0.979015
Fitted	2870.8	0.978985
Fitted	2870.83	0.978955
Fitted	2870.86	0.978923
Fitted	2870.89	0.978892
Fitted	2870.92	0.978859
Fitted	2870.95	0.978826
Fitted	2870.98	0.978793
Fitted	2871.01	0.978759
Fitted	2871.04	0.978725
Fitted	2871.07	0.97869
Fitted	2871.1	0.978654
Fitted	2871.13	0.978618
Fitted	2871.16	0.978582
Fitted	2871.19	0.978545
Fitted	2871.22	0.978507
Fitted	2871.25	0.978469
Fitted	2871.28	0.978431
Fitted	2871.31	0.978392
Fitted	2871.34	0.978353
Fitted	2871.37	0.978313
Fitted	2871.4	0.978274
Fitted	2871.43	0.978233
Fitted	2871.46	0.978192
Fitted	2871.49	0.978151
Fitted	2871.52	0.97811
Fitted	2871.55	0.978068
Fitted	2871.58	0.978026
Fitted	2871.61	0.977983
Fitted	2871.64	0.977941
Fitted	2871.67	0.977898
Fitted	2871.7	0.977854
Fitted	2871.73	0.977811
Fitted	2871.76	0.977767
Fitted	2871.79	0.977723
Fitted	2871.82	0.977679
Fitted	2871.85	0.977634
Fitted	2871.88	0.97759
Fitted	2871.91	0.977545
Fitted	2871.94	0.9775
Fitted	2871.97	0.977455
Fitted	2872	0.97741
Fitted	2872.03	0.977365
Fitted	2872.06	0.97732
Fitted	2872.09	0.977274
Fitted	2872.12	0.977229
Fitted	2872.15	0.977183
Fitted	2872.18	0.977138
Fitted	2872.21	0.977092
Fitted	2872.24	0.977047
Fitted	2872.27	0.977002
Fitted	2872.3	0.976956
Fitted	2872.33	0.976911
Fitted	2872.36	0.976866
Fitted	2872.39	0.976821
Fitted	2872.42	0.976776
Fitted	2872.45	0.976731
Fitted	2872.48	0.976687
Fitted	2872.51	0.976643
Fitted	2872.54	0.976599
Fitted	2872.57	0.976555
Fitted	2872.6	0.976511
Fitted	2872.63	0.976468
Fitted	2872.66	0.976425
Fitted	2872.69	0.976382
Fitted	2872.72	0.97634
Fitted	2872.75	0.976298
Fitted	2872.78	0.976257
Fitted	2872.81	0.976215
Fitted	2872.84	0.976175
Fitted	2872.87	0.976135
Fitted	2872.9	0.976095
Fitted	2872.93	0.976056
Fitted	2872.96	0.976017
Fitted	2872.99	0.975979
Fitted	2873.02	0.975941
Fitted	2873.05	0.975904
Fitted	2873.08	0.975868
Fitted	2873.11	0.975832
Fitted	2873.14	0.975797
Fitted	2873.17	0.975762
Fitted	2873.2	0.975729
Fitted	2873.23	0.975696
Fitted	2873.26	0.975663
Fitted	2873.29	0.975632
Fitted	2873.32	0.975601
Fitted	2873.35	0.975571
Fitted	2873.38	0.975542
Fitted	2873.41	0.975514
Fitted	2873.44	0.975486
Fitted	2873.47	0.97546
Fitted	2873.5	0.975434
Fitted	2873.53	0.975409
Fitted	2873.56	0.975385
Fitted	2873.59	0.975363
Fitted	2873.62	0.975341
Fitted	2873.65	0.97532
Fitted	2873.68	0.9753
Fitted	2873.71	0.975281
Fitted	2873.74	0.975263
Fitted	2873.77	0.975247
Fitted	2873.8	0.975231
Fitted	2873.83	0.975217
Fitted	2873.86	0.975203
Fitted	2873.89	0.975191
Fitted	2873.92	0.97518
Fitted	2873.95	0.97517
Fitted	2873.98	0.975161
Fitted	2874.01	0.975153
Fitted	2874.04	0.975147
Fitted	2874.07	0.975142
Fitted	2874.1	0.975138
Fitted	2874.13	0.975135
Fitted	2874.16	0.975134
Fitted	2874.19	0.975133
Fitted	2874.22	0.975134
Fitted	2874.25	0.975137
Fitted	2874.28	0.97514
Fitted	2874.31	0.975145
Fitted	2874.34	0.975151
Fitted	2874.37	0.975159
Fitted	2874.4	0.975167
Fitted	2874.43	0.975178
Fitted	2874.46	0.975189
Fitted	2874.49	0.975202
Fitted	2874.52	0.975216
Fitted	2874.55	0.975231
Fitted	2874.58	0.975248
Fitted	2874.61	0.975266
Fitted	2874.64	0.975286
Fitted	2874.67	0.975306
Fitted	2874.7	0.975328
Fitted	2874.73	0.975352
Fitted	2874.76	0.975377
Fitted	2874.79	0.975403
Fitted	2874.82	0.97543
Fitted	2874.85	0.975459
Fitted	2874.88	0.975489
Fitted	2874.91	0.975521
Fitted	2874.94	0.975553
Fitted	2874.97	0.975588
Fitted	2875	0.975623
Fitted	2875.03	0.97566
Fitted	2875.06	0.975698
Fitted	2875.09	0.975737
Fitted	2875.12	0.975777
Fitted	2875.15	0.975819
Fitted	2875.18	0.975862
Fitted	2875.21	0.975907
Fitted	2875.24	0.975952
Fitted	2875.27	0.975999
Fitted	2875.3	0.976047
Fitted	2875.33	0.976096
Fitted	2875.36	0.976147
Fitted	2875.39	0.976198
Fitted	2875.42	0.976251
Fitted	2875.45	0.976305
Fitted	2875.48	0.97636
Fitted	2875.51	0.976416
Fitted	2875.54	0.976473
Fitted	2875.57	0.976531
Fitted	2875.6	0.976591
Fitted	2875.63	0.976651
Fitted	2875.66	0.976713
Fitted	2875.69	0.976775
Fitted	2875.72	0.976839
Fitted	2875.75	0.976904
Fitted	2875.78	0.976969
Fitted	2875.81	0.977036
Fitted	2875.84	0.977103
Fitted	2875.87	0.977171
Fitted	2875.9	0.977241
Fitted	2875.93	0.977311
Fitted	2875.96	0.977382
Fitted	2875.99	0.977453
Fitted	2876.02	0.977526
Fitted	2876.05	0.9776
Fitted	2876.08	0.977674
Fitted	2876.11	0.977749
Fitted	2876.14	0.977825
Fitted	2876.17	0.977901
Fitted	2876.2	0.977978
Fitted	2876.23	0.978056
Fitted	2876.26	0.978135
Fitted	2876.29	0.978214
Fitted	2876.32	0.978294
Fitted	2876.35	0.978374
Fitted	2876.38	0.978456
Fitted	2876.41	0.978537
Fitted	2876.44	0.978619
Fitted	2876.47	0.978702
Fitted	2876.5	0.978785
Fitted	2876.53	0.978869
Fitted	2876.56	0.978953
Fitted	2876.59	0.979038
Fitted	2876.62	0.979123
Fitted	2876.65	0.979209
Fitted	2876.68	0.979294
Fitted	2876.71	0.979381
Fitted	2876.74	0.979467
Fitted	2876.77	0.979554
Fitted	2876.8	0.979642
Fitted	2876.83	0.979729
Fitted	2876.86	0.979817
Fitted	2876.89	0.979906
Fitted	2876.92	0.979994
Fitted	2876.95	0.980083
Fitted	2876.98	0.980172
Fitted	2877.01	0.980261
Fitted	2877.04	0.98035
Fitted	2877.07	0.98044
Fitted	2877.1	0.980529
Fitted	2877.13	0.980619
Fitted	2877.16	0.980709
Fitted	2877.19	0.980799
Fitted	2877.22	0.980889
Fitted	2877.25	0.980979
Fitted	2877.28	0.981069
Fitted	2877.31	0.98116
Fitted	2877.34	0.98125
Fitted	2877.37	0.98134
Fitted	2877.4	0.981431
Fitted	2877.43	0.981521
Fitted	2877.46	0.981611
Fitted	2877.49	0.981702
Fitted	2877.52	0.981792
Fitted	2877.55	0.981882
Fitted	2877.58	0.981972
Fitted	2877.61	0.982062
Fitted	2877.64	0.982152
Fitted	2877.67	0.982242
Fitted	2877.7	0.982332
Fitted	2877.73	0.982421
Fitted	2877.76	0.982511
Fitted	2877.79	0.9826
Fitted	2877.82	0.982689
Fitted	2877.85	0.982778
Fitted	2877.88	0.982867
Fitted	2877.91	0.982955
Fitted	2877.94	0.983044
Fitted	2877.97	0.983132
Fitted	2878	0.98322
Fitted	2878.03	0.983308
Fitted	2878.06	0.983395
Fitted	2878.09	0.983483
Fitted	2878.12	0.98357
Fitted	2878.15	0.983656
Fitted	2878.18	0.983743
Fitted	2878.21	0.983829
Fitted	2878.24	0.983915
Fitted	2878.27	0.984001
Fitted	2878.3	0.984086
Fitted	2878.33	0.984171
Fitted	2878.36	0.984256
Fitted	2878.39	0.984341
Fitted	2878.42	0.984425
Fitted	2878.45	0.984509
Fitted	2878.48	0.984592
Fitted	2878.51	0.984676
Fitted	2878.54	0.984759
Fitted	2878.57	0.984841
Fitted	2878.6	0.984923
Fitted	2878.63	0.985005
Fitted	2878.66	0.985087
Fitted	2878.69	0.985168
Fitted	2878.72	0.985249
Fitted	2878.75	0.985329
Fitted	2878.78	0.985409
Fitted	2878.81	0.985489
Fitted	2878.84	0.985569
Fitted	2878.87	0.985648
Fitted	2878.9	0.985726
Fitted	2878.93	0.985804
Fitted	2878.96	0.985882
Fitted	2878.99	0.98596
Fitted	2879.02	0.986037
Fitted	2879.05	0.986114
Fitted	2879.08	0.98619
Fitted	2879.11	0.986266
Fitted	2879.14	0.986342
Fitted	2879.17	0.986417
Fitted	2879.2	0.986491
Fitted	2879.23	0.986566
Fitted	2879.26	0.98664
Fitted	2879.29	0.986713
Fitted	2879.32	0.986787
Fitted	2879.35	0.986859
Fitted	2879.38	0.986932
Fitted	2879.41	0.987004
Fitted	2879.44	0.987075
Fitted	2879.47	0.987147
Fitted	2879.5	0.987217
Fitted	2879.53	0.987288
Fitted	2879.56	0.987358
Fitted	2879.59	0.987427
Fitted	2879.62	0.987497
Fitted	2879.65	0.987565
Fitted	2879.68	0.987634
Fitted	2879.71	0.987702
Fitted	2879.74	0.987769
Fitted	2879.77	0.987836
Fitted	2879.8	0.987903
Fitted	2879.83	0.98797
Fitted	2879.86	0.988036
Fitted	2879.89	0.988101
Fitted	2879.92	0.988166
Fitted	2879.95	0.988231
Fitted	2879.98	0.988295
Fitted	2880.02	0.988359
Fitted	2880.05	0.988423
Fitted	2880.08	0.988486
Fitted	2880.11	0.988549
Fitted	2880.14	0.988612
Fitted	2880.17	0.988674
Fitted	2880.2	0.988735
Fitted	2880.23	0.988797
Fitted	2880.26	0.988857
Fitted	2880.29	0.988918
Fitted	2880.32	0.988978
Fitted	2880.35	0.989038
Fitted	2880.38	0.989097
Fitted	2880.41	0.989156
Fitted	2880.44	0.989215
Fitted	2880.47	0.989273
Fitted	2880.5	0.989331
Fitted	2880.53	0.989388
Fitted	2880.56	0.989445
Fitted	2880.59	0.989502
Fitted	2880.62	0.989558
Fitted	2880.65	0.989614
Fitted	2880.68	0.98967
Fitted	2880.71	0.989725
Fitted	2880.74	0.98978
Fitted	2880.77	0.989835
Fitted	2880.8	0.989889
Fitted	2880.83	0.989943
Fitted	2880.86	0.989996
Fitted	2880.89	0.99005
Fitted	2880.92	0.990102
Fitted	2880.95	0.990155
Fitted	2880.98	0.990207
Fitted	2881.01	0.990259
Fitted	2881.04	0.99031
Fitted	2881.07	0.990361
Fitted	2881.1	0.990412
Fitted	2881.13	0.990462
Fitted	2881.16	0.990512
Fitted	2881.19	0.990562
Fitted	2881.22	0.990611
Fitted	2881.25	0.990661
Fitted	2881.28	0.990709
Fitted	2881.31	0.990758
Fitted	2881.34	0.990806
Fitted	2881.37	0.990854
Fitted	2881.4	0.990901
Fitted	2881.43	0.990948
Fitted	2881.46	0.990995
Fitted	2881.49	0.991042
Fitted	2881.52	0.991088
Fitted	2881.55	0.991134
Fitted	2881.58	0.991179
Fitted	2881.61	0.991224
Fitted	2881.64	0.991269
Fitted	2881.67	0.991314
Fitted	2881.7	0.991359
Fitted	2881.73	0.991403
Fitted	2881.76	0.991446
Fitted	2881.79	0.99149
Fitted	2881.82	0.991533
Fitted	2881.85	0.991576
Fitted	2881.88	0.991619
Fitted	2881.91	0.991661
Fitted	2881.94	0.991703
Fitted	2881.97	0.991745
Fitted	2882	0.991786
Fitted	2882.03	0.991828
Fitted	2882.06	0.991868
Fitted	2882.09	0.991909
Fitted	2882.12	0.99195
Fitted	2882.15	0.99199
Fitted	2882.18	0.99203
Fitted	2882.21	0.992069
Fitted	2882.24	0.992108
Fitted	2882.27	0.992148
Fitted	2882.3	0.992186
Fitted	2882.33	0.992225
Fitted	2882.36	0.992263
Fitted	2882.39	0.992301
Fitted	2882.42	0.992339
Fitted	2882.45	0.992377
Fitted	2882.48	0.992414
Fitted	2882.51	0.992451
Fitted	2882.54	0.992488
Fitted	2882.57	0.992524
Fitted	2882.6	0.992561
Fitted	2882.63	0.992597
Fitted	2882.66	0.992632
Fitted	2882.69	0.992668
Fitted	2882.72	0.992703
Fitted	2882.75	0.992738
Fitted	2882.78	0.992773
Fitted	2882.81	0.992808
Fitted	2882.84	0.992842
Fitted	2882.87	0.992877
Fitted	2882.9	0.992911
Fitted	2882.93	0.992944
Fitted	2882.96	0.992978
Fitted	2882.99	0.993011
Fitted	2883.02	0.993044
Fitted	2883.05	0.993077
Fitted	2883.08	0.99311
Fitted	2883.11	0.993142
Fitted	2883.14	0.993175
Fitted	2883.17	0.993207
Fitted	2883.2	0.993238
Fitted	2883.23	0.99327
Fitted	2883.26	0.993301
Fitted	2883.29	0.993333
Fitted	2883.32	0.993364
Fitted	2883.35	0.993394
Fitted	2883.38	0.993425
Fitted	2883.41	0.993455
Fitted	2883.44	0.993486
Fitted	2883.47	0.993516
Fitted	2883.5	0.993545
Fitted	2883.53	0.993575
Fitted	2883.56	0.993604
Fitted	2883.59	0.993634
Fitted	2883.62	0.993663
Fitted	2883.65	0.993691
Fitted	2883.68	0.99372
Fitted	2883.71	0.993749
Fitted	2883.74	0.993777
Fitted	2883.77	0.993805
Fitted	2883.8	0.993833
Fitted	2883.83	0.993861
Fitted	2883.86	0.993888
Fitted	2883.89	0.993916
Fitted	2883.92	0.993943
Fitted	2883.95	0.99397
Fitted	2883.98	0.993997
Fitted	2884.01	0.994024
Fitted	2884.04	0.99405
Fitted	2884.07	0.994077
Fitted	2884.1	0.994103
Fitted	2884.13	0.994129
Fitted	2884.16	0.994155
Fitted	2884.19	0.994181
Fitted	2884.22	0.994206
Fitted	2884.25	0.994232
Fitted	2884.28	0.994257
Fitted	2884.31	0.994282
Fitted	2884.34	0.994307
Fitted	2884.37	0.994332
Fitted	2884.4	0.994356
Fitted	2884.43	0.994381
Fitted	2884.46	0.994405
Fitted	2884.49	0.994429
Fitted	2884.52	0.994453
Fitted	2884.55	0.994477
Fitted	2884.58	0.994501
Fitted	2884.61	0.994524
Fitted	2884.64	0.994548
Fitted	2884.67	0.994571
Fitted	2884.7	0.994594
Fitted	2884.73	0.994617
Fitted	2884.76	0.99464
Fitted	2884.79	0.994663
Fitted	2884.82	0.994685
Fitted	2884.85	0.994708
Fitted	2884.88	0.99473
Fitted	2884.91	0.994752
Fitted	2884.94	0.994774
Fitted	2884.97	0.994796
Fitted	2885	0.994818

## Sheet: Fig4F
Data_type	Frequency	Intensity
Measured	2855	0.988665
Measured	2855.07	0.988718
Measured	2855.15	0.988165
Measured	2855.22	0.988009
Measured	2855.3	0.987832
Measured	2855.38	0.987729
Measured	2855.45	0.98793
Measured	2855.53	0.987436
Measured	2855.6	0.987184
Measured	2855.68	0.9868
Measured	2855.75	0.986899
Measured	2855.82	0.986797
Measured	2855.9	0.986323
Measured	2855.97	0.986565
Measured	2856.05	0.986203
Measured	2856.12	0.985889
Measured	2856.2	0.985823
Measured	2856.28	0.985258
Measured	2856.35	0.985519
Measured	2856.43	0.985185
Measured	2856.5	0.984912
Measured	2856.57	0.984707
Measured	2856.65	0.984399
Measured	2856.72	0.984636
Measured	2856.8	0.984221
Measured	2856.88	0.983754
Measured	2856.95	0.983486
Measured	2857.03	0.983667
Measured	2857.1	0.983096
Measured	2857.18	0.983057
Measured	2857.25	0.982606
Measured	2857.32	0.982598
Measured	2857.4	0.982169
Measured	2857.47	0.981781
Measured	2857.55	0.981705
Measured	2857.62	0.98172
Measured	2857.7	0.981438
Measured	2857.78	0.98108
Measured	2857.85	0.980726
Measured	2857.93	0.980478
Measured	2858	0.980117
Measured	2858.07	0.980143
Measured	2858.15	0.979851
Measured	2858.22	0.979802
Measured	2858.3	0.97958
Measured	2858.38	0.979198
Measured	2858.45	0.978705
Measured	2858.53	0.978645
Measured	2858.6	0.978312
Measured	2858.68	0.978209
Measured	2858.75	0.977664
Measured	2858.82	0.977764
Measured	2858.9	0.977335
Measured	2858.97	0.977205
Measured	2859.05	0.976962
Measured	2859.12	0.976632
Measured	2859.2	0.976467
Measured	2859.28	0.976012
Measured	2859.35	0.975827
Measured	2859.43	0.975704
Measured	2859.5	0.975426
Measured	2859.57	0.975123
Measured	2859.65	0.975128
Measured	2859.72	0.974827
Measured	2859.8	0.974662
Measured	2859.88	0.974068
Measured	2859.95	0.973831
Measured	2860.03	0.973321
Measured	2860.1	0.973525
Measured	2860.18	0.973111
Measured	2860.25	0.972768
Measured	2860.32	0.972699
Measured	2860.4	0.972239
Measured	2860.47	0.972257
Measured	2860.55	0.971728
Measured	2860.62	0.971407
Measured	2860.7	0.971144
Measured	2860.78	0.971126
Measured	2860.85	0.970777
Measured	2860.93	0.97032
Measured	2861	0.970021
Measured	2861.07	0.969908
Measured	2861.15	0.969385
Measured	2861.22	0.969329
Measured	2861.3	0.969107
Measured	2861.38	0.968928
Measured	2861.45	0.968923
Measured	2861.53	0.968388
Measured	2861.6	0.967978
Measured	2861.68	0.967847
Measured	2861.75	0.967657
Measured	2861.82	0.967181
Measured	2861.9	0.966809
Measured	2861.97	0.966649
Measured	2862.05	0.966538
Measured	2862.12	0.966152
Measured	2862.2	0.965956
Measured	2862.28	0.965675
Measured	2862.35	0.965578
Measured	2862.43	0.965238
Measured	2862.5	0.964478
Measured	2862.57	0.964726
Measured	2862.65	0.96426
Measured	2862.72	0.964082
Measured	2862.8	0.963693
Measured	2862.88	0.96368
Measured	2862.95	0.963209
Measured	2863.03	0.962753
Measured	2863.1	0.962616
Measured	2863.18	0.962561
Measured	2863.25	0.962126
Measured	2863.32	0.962202
Measured	2863.4	0.961999
Measured	2863.47	0.96161
Measured	2863.55	0.961119
Measured	2863.62	0.960668
Measured	2863.7	0.960732
Measured	2863.78	0.960424
Measured	2863.85	0.960219
Measured	2863.93	0.959889
Measured	2864	0.960057
Measured	2864.07	0.959873
Measured	2864.15	0.959219
Measured	2864.22	0.959262
Measured	2864.3	0.959274
Measured	2864.38	0.958867
Measured	2864.45	0.959061
Measured	2864.53	0.959016
Measured	2864.6	0.958609
Measured	2864.68	0.958423
Measured	2864.75	0.95814
Measured	2864.82	0.958272
Measured	2864.9	0.958071
Measured	2864.97	0.958046
Measured	2865.05	0.957662
Measured	2865.12	0.957736
Measured	2865.2	0.957889
Measured	2865.28	0.957482
Measured	2865.35	0.957393
Measured	2865.43	0.95747
Measured	2865.5	0.957419
Measured	2865.57	0.957738
Measured	2865.65	0.958161
Measured	2865.72	0.957713
Measured	2865.8	0.957688
Measured	2865.88	0.957658
Measured	2865.95	0.957664
Measured	2866.03	0.957849
Measured	2866.1	0.957998
Measured	2866.18	0.958338
Measured	2866.25	0.958149
Measured	2866.32	0.958313
Measured	2866.4	0.95845
Measured	2866.47	0.958635
Measured	2866.55	0.958678
Measured	2866.62	0.958707
Measured	2866.7	0.958981
Measured	2866.78	0.959377
Measured	2866.85	0.95956
Measured	2866.93	0.959874
Measured	2867	0.960044
Measured	2867.07	0.960039
Measured	2867.15	0.960247
Measured	2867.22	0.960936
Measured	2867.3	0.961364
Measured	2867.38	0.961628
Measured	2867.45	0.962149
Measured	2867.53	0.962468
Measured	2867.6	0.962964
Measured	2867.68	0.963375
Measured	2867.75	0.963593
Measured	2867.82	0.963798
Measured	2867.9	0.964646
Measured	2867.97	0.964786
Measured	2868.05	0.965458
Measured	2868.12	0.965645
Measured	2868.2	0.966118
Measured	2868.28	0.96663
Measured	2868.35	0.967084
Measured	2868.43	0.967705
Measured	2868.5	0.968277
Measured	2868.57	0.968769
Measured	2868.65	0.968815
Measured	2868.72	0.969071
Measured	2868.8	0.969564
Measured	2868.88	0.970053
Measured	2868.95	0.969896
Measured	2869.03	0.970645
Measured	2869.1	0.970999
Measured	2869.18	0.971326
Measured	2869.25	0.971451
Measured	2869.32	0.971597
Measured	2869.4	0.971699
Measured	2869.47	0.971854
Measured	2869.55	0.971644
Measured	2869.62	0.971938
Measured	2869.7	0.972088
Measured	2869.78	0.972208
Measured	2869.85	0.972201
Measured	2869.93	0.971832
Measured	2870	0.97195
Measured	2870.07	0.971577
Measured	2870.15	0.971283
Measured	2870.22	0.971187
Measured	2870.3	0.970525
Measured	2870.38	0.970539
Measured	2870.45	0.970391
Measured	2870.53	0.969579
Measured	2870.6	0.969261
Measured	2870.68	0.968982
Measured	2870.75	0.968565
Measured	2870.82	0.968239
Measured	2870.9	0.967538
Measured	2870.97	0.967008
Measured	2871.05	0.966874
Measured	2871.12	0.966179
Measured	2871.2	0.966249
Measured	2871.28	0.96546
Measured	2871.35	0.965038
Measured	2871.43	0.964417
Measured	2871.5	0.963699
Measured	2871.57	0.963907
Measured	2871.65	0.963589
Measured	2871.72	0.962694
Measured	2871.8	0.962354
Measured	2871.88	0.961856
Measured	2871.95	0.961395
Measured	2872.03	0.961326
Measured	2872.1	0.961214
Measured	2872.18	0.960895
Measured	2872.25	0.96064
Measured	2872.32	0.960443
Measured	2872.4	0.960712
Measured	2872.47	0.960019
Measured	2872.55	0.959666
Measured	2872.62	0.959205
Measured	2872.7	0.95912
Measured	2872.78	0.959027
Measured	2872.85	0.959118
Measured	2872.93	0.959259
Measured	2873	0.958748
Measured	2873.07	0.958594
Measured	2873.15	0.958716
Measured	2873.22	0.958421
Measured	2873.3	0.958406
Measured	2873.38	0.958037
Measured	2873.45	0.958433
Measured	2873.53	0.958392
Measured	2873.6	0.958288
Measured	2873.68	0.957886
Measured	2873.75	0.958078
Measured	2873.82	0.958348
Measured	2873.9	0.958278
Measured	2873.97	0.958398
Measured	2874.05	0.958217
Measured	2874.12	0.958208
Measured	2874.2	0.958411
Measured	2874.28	0.958558
Measured	2874.35	0.958737
Measured	2874.43	0.959051
Measured	2874.5	0.959162
Measured	2874.57	0.959105
Measured	2874.65	0.959233
Measured	2874.72	0.959378
Measured	2874.8	0.959997
Measured	2874.88	0.959594
Measured	2874.95	0.959731
Measured	2875.03	0.960158
Measured	2875.1	0.960643
Measured	2875.18	0.960602
Measured	2875.25	0.960581
Measured	2875.32	0.961016
Measured	2875.4	0.961309
Measured	2875.47	0.961408
Measured	2875.55	0.961326
Measured	2875.62	0.961567
Measured	2875.7	0.962087
Measured	2875.78	0.962257
Measured	2875.85	0.962904
Measured	2875.93	0.963239
Measured	2876	0.96263
Measured	2876.07	0.963452
Measured	2876.15	0.963563
Measured	2876.22	0.963839
Measured	2876.3	0.964087
Measured	2876.38	0.964933
Measured	2876.45	0.964709
Measured	2876.53	0.964846
Measured	2876.6	0.965265
Measured	2876.68	0.965757
Measured	2876.75	0.96576
Measured	2876.82	0.966124
Measured	2876.9	0.966583
Measured	2876.97	0.967102
Measured	2877.05	0.966844
Measured	2877.12	0.967031
Measured	2877.2	0.967431
Measured	2877.28	0.96775
Measured	2877.35	0.968128
Measured	2877.43	0.968252
Measured	2877.5	0.968729
Measured	2877.57	0.968865
Measured	2877.65	0.96917
Measured	2877.72	0.969352
Measured	2877.8	0.969665
Measured	2877.88	0.96993
Measured	2877.95	0.969871
Measured	2878.03	0.970319
Measured	2878.1	0.970695
Measured	2878.18	0.97078
Measured	2878.25	0.97101
Measured	2878.32	0.971275
Measured	2878.4	0.971489
Measured	2878.47	0.971974
Measured	2878.55	0.972207
Measured	2878.62	0.972354
Measured	2878.7	0.972868
Measured	2878.78	0.973226
Measured	2878.85	0.973298
Measured	2878.93	0.973421
Measured	2879	0.973465
Measured	2879.07	0.973844
Measured	2879.15	0.974133
Measured	2879.22	0.974069
Measured	2879.3	0.97503
Measured	2879.38	0.975044
Measured	2879.45	0.975395
Measured	2879.53	0.975744
Measured	2879.6	0.976122
Measured	2879.68	0.976197
Measured	2879.75	0.976433
Measured	2879.82	0.976324
Measured	2879.9	0.977173
Measured	2879.97	0.977426
Measured	2880.05	0.977476
Measured	2880.12	0.977538
Measured	2880.2	0.978057
Measured	2880.28	0.977865
Measured	2880.35	0.978123
Measured	2880.43	0.978746
Measured	2880.5	0.978777
Measured	2880.57	0.979409
Measured	2880.65	0.979256
Measured	2880.72	0.979713
Measured	2880.8	0.980038
Measured	2880.88	0.979906
Measured	2880.95	0.980134
Measured	2881.03	0.980539
Measured	2881.1	0.981123
Measured	2881.18	0.980599
Measured	2881.25	0.981313
Measured	2881.32	0.98182
Measured	2881.4	0.981659
Measured	2881.47	0.982131
Measured	2881.55	0.982701
Measured	2881.62	0.982489
Measured	2881.7	0.982809
Measured	2881.78	0.983045
Measured	2881.85	0.983286
Measured	2881.93	0.983159
Measured	2882	0.983694
Measured	2882.07	0.983762
Measured	2882.15	0.984299
Measured	2882.22	0.983961
Measured	2882.3	0.984183
Measured	2882.38	0.984817
Measured	2882.45	0.985242
Measured	2882.53	0.984803
Measured	2882.6	0.985281
Measured	2882.68	0.985757
Measured	2882.75	0.985572
Measured	2882.82	0.986022
Measured	2882.9	0.986101
Measured	2882.97	0.986177
Measured	2883.05	0.98605
Measured	2883.12	0.986275
Measured	2883.2	0.986691
Measured	2883.28	0.986824
Measured	2883.35	0.98702
Measured	2883.43	0.987379
Measured	2883.5	0.986991
Measured	2883.57	0.987498
Measured	2883.65	0.987354
Measured	2883.72	0.987569
Measured	2883.8	0.987891
Measured	2883.88	0.988608
Measured	2883.95	0.988478
Measured	2884.03	0.988354
Measured	2884.1	0.988388
Measured	2884.18	0.988678
Measured	2884.25	0.988943
Measured	2884.32	0.988974
Measured	2884.4	0.988654
Measured	2884.47	0.988983
Measured	2884.55	0.989458
Measured	2884.62	0.989731
Measured	2884.7	0.989389
Measured	2884.78	0.989581
Measured	2884.85	0.989857
Measured	2884.93	0.990383
Measured	2885	0.990168
Fitted	2855	0.9887
Fitted	2855.03	0.988649
Fitted	2855.06	0.988598
Fitted	2855.09	0.988547
Fitted	2855.12	0.988495
Fitted	2855.15	0.988444
Fitted	2855.18	0.988391
Fitted	2855.21	0.988339
Fitted	2855.24	0.988286
Fitted	2855.27	0.988233
Fitted	2855.3	0.988179
Fitted	2855.33	0.988126
Fitted	2855.36	0.988071
Fitted	2855.39	0.988017
Fitted	2855.42	0.987962
Fitted	2855.45	0.987907
Fitted	2855.48	0.987852
Fitted	2855.51	0.987796
Fitted	2855.54	0.987739
Fitted	2855.57	0.987683
Fitted	2855.6	0.987626
Fitted	2855.63	0.987569
Fitted	2855.66	0.987511
Fitted	2855.69	0.987453
Fitted	2855.72	0.987395
Fitted	2855.75	0.987336
Fitted	2855.78	0.987277
Fitted	2855.81	0.987217
Fitted	2855.84	0.987158
Fitted	2855.87	0.987097
Fitted	2855.9	0.987037
Fitted	2855.93	0.986976
Fitted	2855.96	0.986915
Fitted	2855.99	0.986853
Fitted	2856.02	0.986791
Fitted	2856.05	0.986728
Fitted	2856.08	0.986665
Fitted	2856.11	0.986602
Fitted	2856.14	0.986538
Fitted	2856.17	0.986474
Fitted	2856.2	0.98641
Fitted	2856.23	0.986345
Fitted	2856.26	0.986279
Fitted	2856.29	0.986214
Fitted	2856.32	0.986147
Fitted	2856.35	0.986081
Fitted	2856.38	0.986014
Fitted	2856.41	0.985946
Fitted	2856.44	0.985879
Fitted	2856.47	0.98581
Fitted	2856.5	0.985742
Fitted	2856.53	0.985673
Fitted	2856.56	0.985603
Fitted	2856.59	0.985533
Fitted	2856.62	0.985463
Fitted	2856.65	0.985392
Fitted	2856.68	0.98532
Fitted	2856.71	0.985248
Fitted	2856.74	0.985176
Fitted	2856.77	0.985104
Fitted	2856.8	0.98503
Fitted	2856.83	0.984957
Fitted	2856.86	0.984883
Fitted	2856.89	0.984808
Fitted	2856.92	0.984733
Fitted	2856.95	0.984658
Fitted	2856.98	0.984582
Fitted	2857.01	0.984505
Fitted	2857.04	0.984428
Fitted	2857.07	0.984351
Fitted	2857.1	0.984273
Fitted	2857.13	0.984195
Fitted	2857.16	0.984116
Fitted	2857.19	0.984037
Fitted	2857.22	0.983957
Fitted	2857.25	0.983876
Fitted	2857.28	0.983795
Fitted	2857.31	0.983714
Fitted	2857.34	0.983632
Fitted	2857.37	0.98355
Fitted	2857.4	0.983467
Fitted	2857.43	0.983384
Fitted	2857.46	0.9833
Fitted	2857.49	0.983215
Fitted	2857.52	0.983131
Fitted	2857.55	0.983045
Fitted	2857.58	0.982959
Fitted	2857.61	0.982873
Fitted	2857.64	0.982786
Fitted	2857.67	0.982698
Fitted	2857.7	0.98261
Fitted	2857.73	0.982521
Fitted	2857.76	0.982432
Fitted	2857.79	0.982342
Fitted	2857.82	0.982252
Fitted	2857.85	0.982161
Fitted	2857.88	0.98207
Fitted	2857.91	0.981978
Fitted	2857.94	0.981886
Fitted	2857.97	0.981793
Fitted	2858	0.981699
Fitted	2858.03	0.981605
Fitted	2858.06	0.98151
Fitted	2858.09	0.981415
Fitted	2858.12	0.981319
Fitted	2858.15	0.981223
Fitted	2858.18	0.981126
Fitted	2858.21	0.981029
Fitted	2858.24	0.980931
Fitted	2858.27	0.980832
Fitted	2858.3	0.980733
Fitted	2858.33	0.980633
Fitted	2858.36	0.980533
Fitted	2858.39	0.980432
Fitted	2858.42	0.98033
Fitted	2858.45	0.980228
Fitted	2858.48	0.980125
Fitted	2858.51	0.980022
Fitted	2858.54	0.979918
Fitted	2858.57	0.979814
Fitted	2858.6	0.979709
Fitted	2858.63	0.979603
Fitted	2858.66	0.979497
Fitted	2858.69	0.979391
Fitted	2858.72	0.979283
Fitted	2858.75	0.979175
Fitted	2858.78	0.979067
Fitted	2858.81	0.978958
Fitted	2858.84	0.978848
Fitted	2858.87	0.978738
Fitted	2858.9	0.978627
Fitted	2858.93	0.978516
Fitted	2858.96	0.978404
Fitted	2858.99	0.978291
Fitted	2859.02	0.978178
Fitted	2859.05	0.978065
Fitted	2859.08	0.97795
Fitted	2859.11	0.977835
Fitted	2859.14	0.97772
Fitted	2859.17	0.977604
Fitted	2859.2	0.977487
Fitted	2859.23	0.97737
Fitted	2859.26	0.977252
Fitted	2859.29	0.977134
Fitted	2859.32	0.977015
Fitted	2859.35	0.976896
Fitted	2859.38	0.976776
Fitted	2859.41	0.976655
Fitted	2859.44	0.976534
Fitted	2859.47	0.976413
Fitted	2859.5	0.97629
Fitted	2859.53	0.976168
Fitted	2859.56	0.976044
Fitted	2859.59	0.975921
Fitted	2859.62	0.975796
Fitted	2859.65	0.975671
Fitted	2859.68	0.975546
Fitted	2859.71	0.97542
Fitted	2859.74	0.975294
Fitted	2859.77	0.975167
Fitted	2859.8	0.975039
Fitted	2859.83	0.974911
Fitted	2859.86	0.974783
Fitted	2859.89	0.974654
Fitted	2859.92	0.974525
Fitted	2859.95	0.974395
Fitted	2859.98	0.974264
Fitted	2860.02	0.974134
Fitted	2860.05	0.974002
Fitted	2860.08	0.973871
Fitted	2860.11	0.973739
Fitted	2860.14	0.973606
Fitted	2860.17	0.973473
Fitted	2860.2	0.97334
Fitted	2860.23	0.973206
Fitted	2860.26	0.973072
Fitted	2860.29	0.972937
Fitted	2860.32	0.972802
Fitted	2860.35	0.972667
Fitted	2860.38	0.972531
Fitted	2860.41	0.972395
Fitted	2860.44	0.972259
Fitted	2860.47	0.972122
Fitted	2860.5	0.971985
Fitted	2860.53	0.971848
Fitted	2860.56	0.97171
Fitted	2860.59	0.971572
Fitted	2860.62	0.971434
Fitted	2860.65	0.971295
Fitted	2860.68	0.971157
Fitted	2860.71	0.971018
Fitted	2860.74	0.970879
Fitted	2860.77	0.97074
Fitted	2860.8	0.9706
Fitted	2860.83	0.97046
Fitted	2860.86	0.970321
Fitted	2860.89	0.970181
Fitted	2860.92	0.970041
Fitted	2860.95	0.969901
Fitted	2860.98	0.96976
Fitted	2861.01	0.96962
Fitted	2861.04	0.96948
Fitted	2861.07	0.969339
Fitted	2861.1	0.969199
Fitted	2861.13	0.969058
Fitted	2861.16	0.968918
Fitted	2861.19	0.968777
Fitted	2861.22	0.968637
Fitted	2861.25	0.968497
Fitted	2861.28	0.968357
Fitted	2861.31	0.968217
Fitted	2861.34	0.968077
Fitted	2861.37	0.967937
Fitted	2861.4	0.967797
Fitted	2861.43	0.967658
Fitted	2861.46	0.967519
Fitted	2861.49	0.96738
Fitted	2861.52	0.967241
Fitted	2861.55	0.967103
Fitted	2861.58	0.966964
Fitted	2861.61	0.966827
Fitted	2861.64	0.966689
Fitted	2861.67	0.966552
Fitted	2861.7	0.966416
Fitted	2861.73	0.966279
Fitted	2861.76	0.966143
Fitted	2861.79	0.966008
Fitted	2861.82	0.965873
Fitted	2861.85	0.965739
Fitted	2861.88	0.965605
Fitted	2861.91	0.965472
Fitted	2861.94	0.965339
Fitted	2861.97	0.965207
Fitted	2862	0.965076
Fitted	2862.03	0.964945
Fitted	2862.06	0.964815
Fitted	2862.09	0.964686
Fitted	2862.12	0.964558
Fitted	2862.15	0.96443
Fitted	2862.18	0.964303
Fitted	2862.21	0.964177
Fitted	2862.24	0.964052
Fitted	2862.27	0.963928
Fitted	2862.3	0.963804
Fitted	2862.33	0.963682
Fitted	2862.36	0.96356
Fitted	2862.39	0.96344
Fitted	2862.42	0.96332
Fitted	2862.45	0.963202
Fitted	2862.48	0.963084
Fitted	2862.51	0.962968
Fitted	2862.54	0.962853
Fitted	2862.57	0.962739
Fitted	2862.6	0.962626
Fitted	2862.63	0.962514
Fitted	2862.66	0.962404
Fitted	2862.69	0.962295
Fitted	2862.72	0.962187
Fitted	2862.75	0.96208
Fitted	2862.78	0.961975
Fitted	2862.81	0.961871
Fitted	2862.84	0.961768
Fitted	2862.87	0.961667
Fitted	2862.9	0.961568
Fitted	2862.93	0.961469
Fitted	2862.96	0.961373
Fitted	2862.99	0.961277
Fitted	2863.02	0.961184
Fitted	2863.05	0.961092
Fitted	2863.08	0.961001
Fitted	2863.11	0.960912
Fitted	2863.14	0.960824
Fitted	2863.17	0.960739
Fitted	2863.2	0.960655
Fitted	2863.23	0.960572
Fitted	2863.26	0.960491
Fitted	2863.29	0.960412
Fitted	2863.32	0.960335
Fitted	2863.35	0.960259
Fitted	2863.38	0.960185
Fitted	2863.41	0.960113
Fitted	2863.44	0.960043
Fitted	2863.47	0.959974
Fitted	2863.5	0.959908
Fitted	2863.53	0.959843
Fitted	2863.56	0.95978
Fitted	2863.59	0.959719
Fitted	2863.62	0.959659
Fitted	2863.65	0.959602
Fitted	2863.68	0.959546
Fitted	2863.71	0.959493
Fitted	2863.74	0.959441
Fitted	2863.77	0.959391
Fitted	2863.8	0.959343
Fitted	2863.83	0.959297
Fitted	2863.86	0.959253
Fitted	2863.89	0.959211
Fitted	2863.92	0.959171
Fitted	2863.95	0.959133
Fitted	2863.98	0.959097
Fitted	2864.01	0.959063
Fitted	2864.04	0.95903
Fitted	2864.07	0.959
Fitted	2864.1	0.958972
Fitted	2864.13	0.958945
Fitted	2864.16	0.958921
Fitted	2864.19	0.958898
Fitted	2864.22	0.958878
Fitted	2864.25	0.958859
Fitted	2864.28	0.958842
Fitted	2864.31	0.958827
Fitted	2864.34	0.958814
Fitted	2864.37	0.958803
Fitted	2864.4	0.958794
Fitted	2864.43	0.958787
Fitted	2864.46	0.958782
Fitted	2864.49	0.958779
Fitted	2864.52	0.958777
Fitted	2864.55	0.958777
Fitted	2864.58	0.95878
Fitted	2864.61	0.958783
Fitted	2864.64	0.958789
Fitted	2864.67	0.958797
Fitted	2864.7	0.958806
Fitted	2864.73	0.958817
Fitted	2864.76	0.95883
Fitted	2864.79	0.958845
Fitted	2864.82	0.958861
Fitted	2864.85	0.958879
Fitted	2864.88	0.958899
Fitted	2864.91	0.95892
Fitted	2864.94	0.958943
Fitted	2864.97	0.958968
Fitted	2865	0.958994
Fitted	2865.03	0.959022
Fitted	2865.06	0.959051
Fitted	2865.09	0.959082
Fitted	2865.12	0.959114
Fitted	2865.15	0.959148
Fitted	2865.18	0.959183
Fitted	2865.21	0.95922
Fitted	2865.24	0.959258
Fitted	2865.27	0.959297
Fitted	2865.3	0.959338
Fitted	2865.33	0.95938
Fitted	2865.36	0.959424
Fitted	2865.39	0.959469
Fitted	2865.42	0.959514
Fitted	2865.45	0.959562
Fitted	2865.48	0.95961
Fitted	2865.51	0.959659
Fitted	2865.54	0.95971
Fitted	2865.57	0.959762
Fitted	2865.6	0.959815
Fitted	2865.63	0.959868
Fitted	2865.66	0.959923
Fitted	2865.69	0.959979
Fitted	2865.72	0.960036
Fitted	2865.75	0.960094
Fitted	2865.78	0.960152
Fitted	2865.81	0.960212
Fitted	2865.84	0.960272
Fitted	2865.87	0.960333
Fitted	2865.9	0.960395
Fitted	2865.93	0.960458
Fitted	2865.96	0.960521
Fitted	2865.99	0.960585
Fitted	2866.02	0.96065
Fitted	2866.05	0.960715
Fitted	2866.08	0.960781
Fitted	2866.11	0.960848
Fitted	2866.14	0.960915
Fitted	2866.17	0.960983
Fitted	2866.2	0.961051
Fitted	2866.23	0.961119
Fitted	2866.26	0.961188
Fitted	2866.29	0.961258
Fitted	2866.32	0.961328
Fitted	2866.35	0.961398
Fitted	2866.38	0.961468
Fitted	2866.41	0.961539
Fitted	2866.44	0.96161
Fitted	2866.47	0.961681
Fitted	2866.5	0.961753
Fitted	2866.53	0.961824
Fitted	2866.56	0.961896
Fitted	2866.59	0.961968
Fitted	2866.62	0.96204
Fitted	2866.65	0.962112
Fitted	2866.68	0.962185
Fitted	2866.71	0.962257
Fitted	2866.74	0.962329
Fitted	2866.77	0.962401
Fitted	2866.8	0.962473
Fitted	2866.83	0.962545
Fitted	2866.86	0.962617
Fitted	2866.89	0.962689
Fitted	2866.92	0.962761
Fitted	2866.95	0.962833
Fitted	2866.98	0.962904
Fitted	2867.01	0.962975
Fitted	2867.04	0.963046
Fitted	2867.07	0.963117
Fitted	2867.1	0.963187
Fitted	2867.13	0.963257
Fitted	2867.16	0.963327
Fitted	2867.19	0.963397
Fitted	2867.22	0.963466
Fitted	2867.25	0.963535
Fitted	2867.28	0.963603
Fitted	2867.31	0.963671
Fitted	2867.34	0.963738
Fitted	2867.37	0.963806
Fitted	2867.4	0.963872
Fitted	2867.43	0.963938
Fitted	2867.46	0.964004
Fitted	2867.49	0.964069
Fitted	2867.52	0.964134
Fitted	2867.55	0.964198
Fitted	2867.58	0.964261
Fitted	2867.61	0.964324
Fitted	2867.64	0.964386
Fitted	2867.67	0.964448
Fitted	2867.7	0.964509
Fitted	2867.73	0.96457
Fitted	2867.76	0.964629
Fitted	2867.79	0.964688
Fitted	2867.82	0.964747
Fitted	2867.85	0.964804
Fitted	2867.88	0.964861
Fitted	2867.91	0.964918
Fitted	2867.94	0.964973
Fitted	2867.97	0.965028
Fitted	2868	0.965082
Fitted	2868.03	0.965135
Fitted	2868.06	0.965188
Fitted	2868.09	0.96524
Fitted	2868.12	0.96529
Fitted	2868.15	0.965341
Fitted	2868.18	0.96539
Fitted	2868.21	0.965438
Fitted	2868.24	0.965486
Fitted	2868.27	0.965532
Fitted	2868.3	0.965578
Fitted	2868.33	0.965623
Fitted	2868.36	0.965667
Fitted	2868.39	0.965711
Fitted	2868.42	0.965753
Fitted	2868.45	0.965794
Fitted	2868.48	0.965835
Fitted	2868.51	0.965875
Fitted	2868.54	0.965913
Fitted	2868.57	0.965951
Fitted	2868.6	0.965988
Fitted	2868.63	0.966024
Fitted	2868.66	0.966059
Fitted	2868.69	0.966093
Fitted	2868.72	0.966125
Fitted	2868.75	0.966158
Fitted	2868.78	0.966189
Fitted	2868.81	0.966219
Fitted	2868.84	0.966248
Fitted	2868.87	0.966276
Fitted	2868.9	0.966303
Fitted	2868.93	0.966329
Fitted	2868.96	0.966354
Fitted	2868.99	0.966378
Fitted	2869.02	0.966401
Fitted	2869.05	0.966423
Fitted	2869.08	0.966444
Fitted	2869.11	0.966464
Fitted	2869.14	0.966483
Fitted	2869.17	0.966501
Fitted	2869.2	0.966518
Fitted	2869.23	0.966534
Fitted	2869.26	0.966549
Fitted	2869.29	0.966563
Fitted	2869.32	0.966576
Fitted	2869.35	0.966588
Fitted	2869.38	0.966598
Fitted	2869.41	0.966608
Fitted	2869.44	0.966617
Fitted	2869.47	0.966624
Fitted	2869.5	0.966631
Fitted	2869.53	0.966637
Fitted	2869.56	0.966641
Fitted	2869.59	0.966644
Fitted	2869.62	0.966647
Fitted	2869.65	0.966648
Fitted	2869.68	0.966649
Fitted	2869.71	0.966648
Fitted	2869.74	0.966646
Fitted	2869.77	0.966643
Fitted	2869.8	0.966639
Fitted	2869.83	0.966634
Fitted	2869.86	0.966629
Fitted	2869.89	0.966622
Fitted	2869.92	0.966614
Fitted	2869.95	0.966605
Fitted	2869.98	0.966594
Fitted	2870.02	0.966583
Fitted	2870.05	0.966571
Fitted	2870.08	0.966558
Fitted	2870.11	0.966544
Fitted	2870.14	0.966529
Fitted	2870.17	0.966513
Fitted	2870.2	0.966495
Fitted	2870.23	0.966477
Fitted	2870.26	0.966458
Fitted	2870.29	0.966438
Fitted	2870.32	0.966416
Fitted	2870.35	0.966394
Fitted	2870.38	0.966371
Fitted	2870.41	0.966347
Fitted	2870.44	0.966322
Fitted	2870.47	0.966296
Fitted	2870.5	0.966268
Fitted	2870.53	0.96624
Fitted	2870.56	0.966211
Fitted	2870.59	0.966181
Fitted	2870.62	0.96615
Fitted	2870.65	0.966119
Fitted	2870.68	0.966086
Fitted	2870.71	0.966052
Fitted	2870.74	0.966018
Fitted	2870.77	0.965982
Fitted	2870.8	0.965946
Fitted	2870.83	0.965908
Fitted	2870.86	0.96587
Fitted	2870.89	0.965831
Fitted	2870.92	0.965791
Fitted	2870.95	0.96575
Fitted	2870.98	0.965709
Fitted	2871.01	0.965666
Fitted	2871.04	0.965623
Fitted	2871.07	0.965579
Fitted	2871.1	0.965534
Fitted	2871.13	0.965488
Fitted	2871.16	0.965441
Fitted	2871.19	0.965394
Fitted	2871.22	0.965346
Fitted	2871.25	0.965297
Fitted	2871.28	0.965247
Fitted	2871.31	0.965197
Fitted	2871.34	0.965146
Fitted	2871.37	0.965094
Fitted	2871.4	0.965042
Fitted	2871.43	0.964989
Fitted	2871.46	0.964935
Fitted	2871.49	0.96488
Fitted	2871.52	0.964825
Fitted	2871.55	0.964769
Fitted	2871.58	0.964713
Fitted	2871.61	0.964656
Fitted	2871.64	0.964599
Fitted	2871.67	0.96454
Fitted	2871.7	0.964482
Fitted	2871.73	0.964423
Fitted	2871.76	0.964363
Fitted	2871.79	0.964303
Fitted	2871.82	0.964242
Fitted	2871.85	0.964181
Fitted	2871.88	0.964119
Fitted	2871.91	0.964057
Fitted	2871.94	0.963995
Fitted	2871.97	0.963932
Fitted	2872	0.963868
Fitted	2872.03	0.963805
Fitted	2872.06	0.963741
Fitted	2872.09	0.963677
Fitted	2872.12	0.963612
Fitted	2872.15	0.963547
Fitted	2872.18	0.963482
Fitted	2872.21	0.963417
Fitted	2872.24	0.963351
Fitted	2872.27	0.963285
Fitted	2872.3	0.96322
Fitted	2872.33	0.963154
Fitted	2872.36	0.963087
Fitted	2872.39	0.963021
Fitted	2872.42	0.962955
Fitted	2872.45	0.962888
Fitted	2872.48	0.962822
Fitted	2872.51	0.962755
Fitted	2872.54	0.962689
Fitted	2872.57	0.962622
Fitted	2872.6	0.962556
Fitted	2872.63	0.96249
Fitted	2872.66	0.962424
Fitted	2872.69	0.962358
Fitted	2872.72	0.962292
Fitted	2872.75	0.962226
Fitted	2872.78	0.962161
Fitted	2872.81	0.962096
Fitted	2872.84	0.962031
Fitted	2872.87	0.961966
Fitted	2872.9	0.961902
Fitted	2872.93	0.961838
Fitted	2872.96	0.961774
Fitted	2872.99	0.961711
Fitted	2873.02	0.961649
Fitted	2873.05	0.961586
Fitted	2873.08	0.961525
Fitted	2873.11	0.961463
Fitted	2873.14	0.961403
Fitted	2873.17	0.961343
Fitted	2873.2	0.961283
Fitted	2873.23	0.961224
Fitted	2873.26	0.961166
Fitted	2873.29	0.961109
Fitted	2873.32	0.961052
Fitted	2873.35	0.960996
Fitted	2873.38	0.960941
Fitted	2873.41	0.960886
Fitted	2873.44	0.960833
Fitted	2873.47	0.96078
Fitted	2873.5	0.960728
Fitted	2873.53	0.960677
Fitted	2873.56	0.960627
Fitted	2873.59	0.960578
Fitted	2873.62	0.96053
Fitted	2873.65	0.960483
Fitted	2873.68	0.960437
Fitted	2873.71	0.960392
Fitted	2873.74	0.960348
Fitted	2873.77	0.960306
Fitted	2873.8	0.960264
Fitted	2873.83	0.960224
Fitted	2873.86	0.960185
Fitted	2873.89	0.960147
Fitted	2873.92	0.960111
Fitted	2873.95	0.960076
Fitted	2873.98	0.960042
Fitted	2874.01	0.960009
Fitted	2874.04	0.959978
Fitted	2874.07	0.959949
Fitted	2874.1	0.95992
Fitted	2874.13	0.959893
Fitted	2874.16	0.959868
Fitted	2874.19	0.959844
Fitted	2874.22	0.959822
Fitted	2874.25	0.959801
Fitted	2874.28	0.959781
Fitted	2874.31	0.959764
Fitted	2874.34	0.959748
Fitted	2874.37	0.959733
Fitted	2874.4	0.95972
Fitted	2874.43	0.959709
Fitted	2874.46	0.959699
Fitted	2874.49	0.959691
Fitted	2874.52	0.959685
Fitted	2874.55	0.959681
Fitted	2874.58	0.959678
Fitted	2874.61	0.959677
Fitted	2874.64	0.959677
Fitted	2874.67	0.95968
Fitted	2874.7	0.959684
Fitted	2874.73	0.95969
Fitted	2874.76	0.959698
Fitted	2874.79	0.959708
Fitted	2874.82	0.959719
Fitted	2874.85	0.959733
Fitted	2874.88	0.959748
Fitted	2874.91	0.959765
Fitted	2874.94	0.959784
Fitted	2874.97	0.959805
Fitted	2875	0.959827
Fitted	2875.03	0.959852
Fitted	2875.06	0.959878
Fitted	2875.09	0.959906
Fitted	2875.12	0.959936
Fitted	2875.15	0.959968
Fitted	2875.18	0.960002
Fitted	2875.21	0.960038
Fitted	2875.24	0.960076
Fitted	2875.27	0.960115
Fitted	2875.3	0.960156
Fitted	2875.33	0.9602
Fitted	2875.36	0.960245
Fitted	2875.39	0.960292
Fitted	2875.42	0.960341
Fitted	2875.45	0.960391
Fitted	2875.48	0.960444
Fitted	2875.51	0.960498
Fitted	2875.54	0.960554
Fitted	2875.57	0.960612
Fitted	2875.6	0.960672
Fitted	2875.63	0.960733
Fitted	2875.66	0.960797
Fitted	2875.69	0.960862
Fitted	2875.72	0.960929
Fitted	2875.75	0.960997
Fitted	2875.78	0.961068
Fitted	2875.81	0.96114
Fitted	2875.84	0.961213
Fitted	2875.87	0.961289
Fitted	2875.9	0.961366
Fitted	2875.93	0.961445
Fitted	2875.96	0.961525
Fitted	2875.99	0.961607
Fitted	2876.02	0.961691
Fitted	2876.05	0.961776
Fitted	2876.08	0.961862
Fitted	2876.11	0.961951
Fitted	2876.14	0.962041
Fitted	2876.17	0.962132
Fitted	2876.2	0.962225
Fitted	2876.23	0.962319
Fitted	2876.26	0.962414
Fitted	2876.29	0.962511
Fitted	2876.32	0.96261
Fitted	2876.35	0.96271
Fitted	2876.38	0.962811
Fitted	2876.41	0.962913
Fitted	2876.44	0.963017
Fitted	2876.47	0.963122
Fitted	2876.5	0.963228
Fitted	2876.53	0.963336
Fitted	2876.56	0.963444
Fitted	2876.59	0.963554
Fitted	2876.62	0.963665
Fitted	2876.65	0.963777
Fitted	2876.68	0.96389
Fitted	2876.71	0.964005
Fitted	2876.74	0.96412
Fitted	2876.77	0.964236
Fitted	2876.8	0.964354
Fitted	2876.83	0.964472
Fitted	2876.86	0.964591
Fitted	2876.89	0.964711
Fitted	2876.92	0.964832
Fitted	2876.95	0.964954
Fitted	2876.98	0.965077
Fitted	2877.01	0.9652
Fitted	2877.04	0.965325
Fitted	2877.07	0.96545
Fitted	2877.1	0.965576
Fitted	2877.13	0.965702
Fitted	2877.16	0.965829
Fitted	2877.19	0.965957
Fitted	2877.22	0.966086
Fitted	2877.25	0.966215
Fitted	2877.28	0.966344
Fitted	2877.31	0.966475
Fitted	2877.34	0.966605
Fitted	2877.37	0.966737
Fitted	2877.4	0.966869
Fitted	2877.43	0.967001
Fitted	2877.46	0.967133
Fitted	2877.49	0.967267
Fitted	2877.52	0.9674
Fitted	2877.55	0.967534
Fitted	2877.58	0.967668
Fitted	2877.61	0.967803
Fitted	2877.64	0.967937
Fitted	2877.67	0.968073
Fitted	2877.7	0.968208
Fitted	2877.73	0.968344
Fitted	2877.76	0.968479
Fitted	2877.79	0.968615
Fitted	2877.82	0.968752
Fitted	2877.85	0.968888
Fitted	2877.88	0.969024
Fitted	2877.91	0.969161
Fitted	2877.94	0.969298
Fitted	2877.97	0.969434
Fitted	2878	0.969571
Fitted	2878.03	0.969708
Fitted	2878.06	0.969845
Fitted	2878.09	0.969982
Fitted	2878.12	0.970119
Fitted	2878.15	0.970255
Fitted	2878.18	0.970392
Fitted	2878.21	0.970529
Fitted	2878.24	0.970666
Fitted	2878.27	0.970802
Fitted	2878.3	0.970939
Fitted	2878.33	0.971075
Fitted	2878.36	0.971211
Fitted	2878.39	0.971347
Fitted	2878.42	0.971483
Fitted	2878.45	0.971618
Fitted	2878.48	0.971754
Fitted	2878.51	0.971889
Fitted	2878.54	0.972024
Fitted	2878.57	0.972159
Fitted	2878.6	0.972293
Fitted	2878.63	0.972427
Fitted	2878.66	0.972561
Fitted	2878.69	0.972695
Fitted	2878.72	0.972828
Fitted	2878.75	0.972961
Fitted	2878.78	0.973094
Fitted	2878.81	0.973226
Fitted	2878.84	0.973358
Fitted	2878.87	0.97349
Fitted	2878.9	0.973621
Fitted	2878.93	0.973752
Fitted	2878.96	0.973883
Fitted	2878.99	0.974013
Fitted	2879.02	0.974143
Fitted	2879.05	0.974272
Fitted	2879.08	0.974401
Fitted	2879.11	0.974529
Fitted	2879.14	0.974657
Fitted	2879.17	0.974785
Fitted	2879.2	0.974912
Fitted	2879.23	0.975039
Fitted	2879.26	0.975165
Fitted	2879.29	0.975291
Fitted	2879.32	0.975416
Fitted	2879.35	0.975541
Fitted	2879.38	0.975666
Fitted	2879.41	0.97579
Fitted	2879.44	0.975913
Fitted	2879.47	0.976036
Fitted	2879.5	0.976158
Fitted	2879.53	0.97628
Fitted	2879.56	0.976401
Fitted	2879.59	0.976522
Fitted	2879.62	0.976643
Fitted	2879.65	0.976762
Fitted	2879.68	0.976882
Fitted	2879.71	0.977001
Fitted	2879.74	0.977119
Fitted	2879.77	0.977236
Fitted	2879.8	0.977354
Fitted	2879.83	0.97747
Fitted	2879.86	0.977586
Fitted	2879.89	0.977702
Fitted	2879.92	0.977817
Fitted	2879.95	0.977931
Fitted	2879.98	0.978045
Fitted	2880.02	0.978158
Fitted	2880.05	0.978271
Fitted	2880.08	0.978383
Fitted	2880.11	0.978495
Fitted	2880.14	0.978606
Fitted	2880.17	0.978716
Fitted	2880.2	0.978826
Fitted	2880.23	0.978935
Fitted	2880.26	0.979044
Fitted	2880.29	0.979152
Fitted	2880.32	0.97926
Fitted	2880.35	0.979367
Fitted	2880.38	0.979474
Fitted	2880.41	0.97958
Fitted	2880.44	0.979685
Fitted	2880.47	0.97979
Fitted	2880.5	0.979894
Fitted	2880.53	0.979998
Fitted	2880.56	0.980101
Fitted	2880.59	0.980204
Fitted	2880.62	0.980306
Fitted	2880.65	0.980407
Fitted	2880.68	0.980508
Fitted	2880.71	0.980608
Fitted	2880.74	0.980708
Fitted	2880.77	0.980807
Fitted	2880.8	0.980906
Fitted	2880.83	0.981004
Fitted	2880.86	0.981101
Fitted	2880.89	0.981198
Fitted	2880.92	0.981294
Fitted	2880.95	0.98139
Fitted	2880.98	0.981485
Fitted	2881.01	0.98158
Fitted	2881.04	0.981674
Fitted	2881.07	0.981768
Fitted	2881.1	0.981861
Fitted	2881.13	0.981954
Fitted	2881.16	0.982046
Fitted	2881.19	0.982137
Fitted	2881.22	0.982228
Fitted	2881.25	0.982318
Fitted	2881.28	0.982408
Fitted	2881.31	0.982497
Fitted	2881.34	0.982586
Fitted	2881.37	0.982674
Fitted	2881.4	0.982762
Fitted	2881.43	0.982849
Fitted	2881.46	0.982936
Fitted	2881.49	0.983022
Fitted	2881.52	0.983107
Fitted	2881.55	0.983192
Fitted	2881.58	0.983277
Fitted	2881.61	0.983361
Fitted	2881.64	0.983445
Fitted	2881.67	0.983528
Fitted	2881.7	0.98361
Fitted	2881.73	0.983692
Fitted	2881.76	0.983774
Fitted	2881.79	0.983855
Fitted	2881.82	0.983935
Fitted	2881.85	0.984015
Fitted	2881.88	0.984095
Fitted	2881.91	0.984174
Fitted	2881.94	0.984252
Fitted	2881.97	0.98433
Fitted	2882	0.984408
Fitted	2882.03	0.984485
Fitted	2882.06	0.984562
Fitted	2882.09	0.984638
Fitted	2882.12	0.984714
Fitted	2882.15	0.984789
Fitted	2882.18	0.984864
Fitted	2882.21	0.984938
Fitted	2882.24	0.985012
Fitted	2882.27	0.985085
Fitted	2882.3	0.985158
Fitted	2882.33	0.98523
Fitted	2882.36	0.985302
Fitted	2882.39	0.985374
Fitted	2882.42	0.985445
Fitted	2882.45	0.985516
Fitted	2882.48	0.985586
Fitted	2882.51	0.985656
Fitted	2882.54	0.985725
Fitted	2882.57	0.985794
Fitted	2882.6	0.985862
Fitted	2882.63	0.98593
Fitted	2882.66	0.985998
Fitted	2882.69	0.986065
Fitted	2882.72	0.986132
Fitted	2882.75	0.986198
Fitted	2882.78	0.986264
Fitted	2882.81	0.98633
Fitted	2882.84	0.986395
Fitted	2882.87	0.98646
Fitted	2882.9	0.986524
Fitted	2882.93	0.986588
Fitted	2882.96	0.986651
Fitted	2882.99	0.986714
Fitted	2883.02	0.986777
Fitted	2883.05	0.98684
Fitted	2883.08	0.986901
Fitted	2883.11	0.986963
Fitted	2883.14	0.987024
Fitted	2883.17	0.987085
Fitted	2883.2	0.987145
Fitted	2883.23	0.987205
Fitted	2883.26	0.987265
Fitted	2883.29	0.987324
Fitted	2883.32	0.987383
Fitted	2883.35	0.987442
Fitted	2883.38	0.9875
Fitted	2883.41	0.987558
Fitted	2883.44	0.987615
Fitted	2883.47	0.987672
Fitted	2883.5	0.987729
Fitted	2883.53	0.987785
Fitted	2883.56	0.987842
Fitted	2883.59	0.987897
Fitted	2883.62	0.987953
Fitted	2883.65	0.988008
Fitted	2883.68	0.988062
Fitted	2883.71	0.988117
Fitted	2883.74	0.988171
Fitted	2883.77	0.988224
Fitted	2883.8	0.988278
Fitted	2883.83	0.988331
Fitted	2883.86	0.988383
Fitted	2883.89	0.988436
Fitted	2883.92	0.988488
Fitted	2883.95	0.988539
Fitted	2883.98	0.988591
Fitted	2884.01	0.988642
Fitted	2884.04	0.988692
Fitted	2884.07	0.988743
Fitted	2884.1	0.988793
Fitted	2884.13	0.988843
Fitted	2884.16	0.988892
Fitted	2884.19	0.988942
Fitted	2884.22	0.98899
Fitted	2884.25	0.989039
Fitted	2884.28	0.989087
Fitted	2884.31	0.989135
Fitted	2884.34	0.989183
Fitted	2884.37	0.989231
Fitted	2884.4	0.989278
Fitted	2884.43	0.989325
Fitted	2884.46	0.989371
Fitted	2884.49	0.989417
Fitted	2884.52	0.989463
Fitted	2884.55	0.989509
Fitted	2884.58	0.989555
Fitted	2884.61	0.9896
Fitted	2884.64	0.989645
Fitted	2884.67	0.989689
Fitted	2884.7	0.989734
Fitted	2884.73	0.989778
Fitted	2884.76	0.989822
Fitted	2884.79	0.989865
Fitted	2884.82	0.989909
Fitted	2884.85	0.989952
Fitted	2884.88	0.989994
Fitted	2884.91	0.990037
Fitted	2884.94	0.990079
Fitted	2884.97	0.990121
Fitted	2885	0.990163

## Sheet: Fig4L
Data_type	Frequency	Intensity
Measured	2855	0.992614
Measured	2855.07	0.991778
Measured	2855.15	0.991302
Measured	2855.22	0.990747
Measured	2855.3	0.989979
Measured	2855.38	0.989608
Measured	2855.45	0.98958
Measured	2855.53	0.989648
Measured	2855.6	0.989857
Measured	2855.68	0.989476
Measured	2855.75	0.988688
Measured	2855.82	0.989262
Measured	2855.9	0.990584
Measured	2855.97	0.990265
Measured	2856.05	0.989268
Measured	2856.12	0.989189
Measured	2856.2	0.988536
Measured	2856.28	0.987133
Measured	2856.35	0.986965
Measured	2856.43	0.986981
Measured	2856.5	0.985731
Measured	2856.57	0.98529
Measured	2856.65	0.98638
Measured	2856.72	0.9868
Measured	2856.8	0.986647
Measured	2856.88	0.987141
Measured	2856.95	0.98685
Measured	2857.03	0.985266
Measured	2857.1	0.984516
Measured	2857.18	0.985152
Measured	2857.25	0.985525
Measured	2857.32	0.985282
Measured	2857.4	0.985461
Measured	2857.47	0.986185
Measured	2857.55	0.986313
Measured	2857.62	0.98537
Measured	2857.7	0.984764
Measured	2857.78	0.985304
Measured	2857.85	0.985512
Measured	2857.93	0.984949
Measured	2858	0.985017
Measured	2858.07	0.985023
Measured	2858.15	0.9833
Measured	2858.22	0.981538
Measured	2858.3	0.981782
Measured	2858.38	0.982762
Measured	2858.45	0.982846
Measured	2858.53	0.982192
Measured	2858.6	0.981267
Measured	2858.68	0.980916
Measured	2858.75	0.98158
Measured	2858.82	0.981802
Measured	2858.9	0.980909
Measured	2858.97	0.980457
Measured	2859.05	0.980876
Measured	2859.12	0.980939
Measured	2859.2	0.980558
Measured	2859.28	0.980357
Measured	2859.35	0.980363
Measured	2859.43	0.980541
Measured	2859.5	0.980696
Measured	2859.57	0.980899
Measured	2859.65	0.981503
Measured	2859.72	0.981497
Measured	2859.8	0.980299
Measured	2859.88	0.97987
Measured	2859.95	0.980647
Measured	2860.03	0.979976
Measured	2860.1	0.977829
Measured	2860.18	0.976997
Measured	2860.25	0.977609
Measured	2860.32	0.978003
Measured	2860.4	0.97784
Measured	2860.47	0.977014
Measured	2860.55	0.975927
Measured	2860.62	0.975934
Measured	2860.7	0.976514
Measured	2860.78	0.976077
Measured	2860.85	0.975524
Measured	2860.93	0.976055
Measured	2861	0.976329
Measured	2861.07	0.975552
Measured	2861.15	0.975274
Measured	2861.22	0.976113
Measured	2861.3	0.976506
Measured	2861.38	0.975743
Measured	2861.45	0.975124
Measured	2861.53	0.975324
Measured	2861.6	0.975139
Measured	2861.68	0.973928
Measured	2861.75	0.972757
Measured	2861.82	0.972446
Measured	2861.9	0.972942
Measured	2861.97	0.973871
Measured	2862.05	0.974436
Measured	2862.12	0.973917
Measured	2862.2	0.972924
Measured	2862.28	0.972705
Measured	2862.35	0.973325
Measured	2862.43	0.973523
Measured	2862.5	0.972342
Measured	2862.57	0.970682
Measured	2862.65	0.970117
Measured	2862.72	0.97051
Measured	2862.8	0.970523
Measured	2862.88	0.970092
Measured	2862.95	0.969883
Measured	2863.03	0.969633
Measured	2863.1	0.969078
Measured	2863.18	0.968862
Measured	2863.25	0.969251
Measured	2863.32	0.96997
Measured	2863.4	0.970745
Measured	2863.47	0.970858
Measured	2863.55	0.969939
Measured	2863.62	0.969358
Measured	2863.7	0.969791
Measured	2863.78	0.969554
Measured	2863.85	0.968438
Measured	2863.93	0.968635
Measured	2864	0.969425
Measured	2864.07	0.968279
Measured	2864.15	0.967096
Measured	2864.22	0.968344
Measured	2864.3	0.968882
Measured	2864.38	0.966522
Measured	2864.45	0.964972
Measured	2864.53	0.965984
Measured	2864.6	0.966572
Measured	2864.68	0.966155
Measured	2864.75	0.966747
Measured	2864.82	0.967447
Measured	2864.9	0.966704
Measured	2864.97	0.966063
Measured	2865.05	0.966738
Measured	2865.12	0.967553
Measured	2865.2	0.967965
Measured	2865.28	0.968516
Measured	2865.35	0.968601
Measured	2865.43	0.967927
Measured	2865.5	0.968149
Measured	2865.57	0.969665
Measured	2865.65	0.970042
Measured	2865.72	0.968393
Measured	2865.8	0.967069
Measured	2865.88	0.967511
Measured	2865.95	0.968429
Measured	2866.03	0.968597
Measured	2866.1	0.96831
Measured	2866.18	0.96812
Measured	2866.25	0.967979
Measured	2866.32	0.967825
Measured	2866.4	0.968015
Measured	2866.47	0.96848
Measured	2866.55	0.968724
Measured	2866.62	0.969006
Measured	2866.7	0.96984
Measured	2866.78	0.970675
Measured	2866.85	0.971001
Measured	2866.93	0.971272
Measured	2867	0.971584
Measured	2867.07	0.971753
Measured	2867.15	0.972289
Measured	2867.22	0.97336
Measured	2867.3	0.974099
Measured	2867.38	0.974202
Measured	2867.45	0.974138
Measured	2867.53	0.973845
Measured	2867.6	0.973115
Measured	2867.68	0.972994
Measured	2867.75	0.974374
Measured	2867.82	0.975883
Measured	2867.9	0.975977
Measured	2867.97	0.975853
Measured	2868.05	0.976755
Measured	2868.12	0.977245
Measured	2868.2	0.976747
Measured	2868.28	0.977102
Measured	2868.35	0.978238
Measured	2868.43	0.978256
Measured	2868.5	0.977798
Measured	2868.57	0.978613
Measured	2868.65	0.979786
Measured	2868.72	0.979933
Measured	2868.8	0.979665
Measured	2868.88	0.979899
Measured	2868.95	0.980557
Measured	2869.03	0.981337
Measured	2869.1	0.9815
Measured	2869.18	0.980731
Measured	2869.25	0.98019
Measured	2869.32	0.980471
Measured	2869.4	0.980808
Measured	2869.47	0.981364
Measured	2869.55	0.982349
Measured	2869.62	0.981948
Measured	2869.7	0.980178
Measured	2869.78	0.979854
Measured	2869.85	0.980637
Measured	2869.93	0.979693
Measured	2870	0.978057
Measured	2870.07	0.978092
Measured	2870.15	0.978664
Measured	2870.22	0.978549
Measured	2870.3	0.978562
Measured	2870.38	0.978551
Measured	2870.45	0.978092
Measured	2870.53	0.97792
Measured	2870.6	0.977687
Measured	2870.68	0.976427
Measured	2870.75	0.975353
Measured	2870.82	0.975697
Measured	2870.9	0.976277
Measured	2870.97	0.975974
Measured	2871.05	0.975581
Measured	2871.12	0.97533
Measured	2871.2	0.974378
Measured	2871.28	0.973387
Measured	2871.35	0.973743
Measured	2871.43	0.974635
Measured	2871.5	0.974432
Measured	2871.57	0.973251
Measured	2871.65	0.972201
Measured	2871.72	0.972002
Measured	2871.8	0.972382
Measured	2871.88	0.971922
Measured	2871.95	0.970326
Measured	2872.03	0.969526
Measured	2872.1	0.97016
Measured	2872.18	0.970437
Measured	2872.25	0.970088
Measured	2872.32	0.970384
Measured	2872.4	0.970807
Measured	2872.47	0.970477
Measured	2872.55	0.97019
Measured	2872.62	0.970304
Measured	2872.7	0.970122
Measured	2872.78	0.969882
Measured	2872.85	0.9703
Measured	2872.93	0.97109
Measured	2873	0.971509
Measured	2873.07	0.971014
Measured	2873.15	0.969876
Measured	2873.22	0.969508
Measured	2873.3	0.970219
Measured	2873.38	0.970543
Measured	2873.45	0.970184
Measured	2873.53	0.969842
Measured	2873.6	0.969476
Measured	2873.68	0.96966
Measured	2873.75	0.970646
Measured	2873.82	0.970338
Measured	2873.9	0.968539
Measured	2873.97	0.968513
Measured	2874.05	0.97029
Measured	2874.12	0.970547
Measured	2874.2	0.969684
Measured	2874.28	0.970065
Measured	2874.35	0.97064
Measured	2874.43	0.970236
Measured	2874.5	0.97044
Measured	2874.57	0.971435
Measured	2874.65	0.971817
Measured	2874.72	0.972241
Measured	2874.8	0.973374
Measured	2874.88	0.973511
Measured	2874.95	0.972449
Measured	2875.03	0.972506
Measured	2875.1	0.97351
Measured	2875.18	0.973083
Measured	2875.25	0.97194
Measured	2875.32	0.972237
Measured	2875.4	0.973067
Measured	2875.47	0.972966
Measured	2875.55	0.972789
Measured	2875.62	0.973059
Measured	2875.7	0.973044
Measured	2875.78	0.972868
Measured	2875.85	0.972967
Measured	2875.93	0.973205
Measured	2876	0.973834
Measured	2876.07	0.974821
Measured	2876.15	0.975374
Measured	2876.22	0.975613
Measured	2876.3	0.976073
Measured	2876.38	0.976109
Measured	2876.45	0.975748
Measured	2876.53	0.976345
Measured	2876.6	0.977477
Measured	2876.68	0.977645
Measured	2876.75	0.977429
Measured	2876.82	0.977831
Measured	2876.9	0.977987
Measured	2876.97	0.977231
Measured	2877.05	0.976264
Measured	2877.12	0.976092
Measured	2877.2	0.977276
Measured	2877.28	0.978766
Measured	2877.35	0.978647
Measured	2877.43	0.977616
Measured	2877.5	0.977955
Measured	2877.57	0.979116
Measured	2877.65	0.979241
Measured	2877.72	0.978973
Measured	2877.8	0.97944
Measured	2877.88	0.980042
Measured	2877.95	0.980479
Measured	2878.03	0.981198
Measured	2878.1	0.981507
Measured	2878.18	0.980812
Measured	2878.25	0.980382
Measured	2878.32	0.98133
Measured	2878.4	0.982427
Measured	2878.47	0.982589
Measured	2878.55	0.98286
Measured	2878.62	0.983531
Measured	2878.7	0.98327
Measured	2878.78	0.982557
Measured	2878.85	0.982896
Measured	2878.93	0.983532
Measured	2879	0.983343
Measured	2879.07	0.983092
Measured	2879.15	0.983286
Measured	2879.22	0.983399
Measured	2879.3	0.983399
Measured	2879.38	0.983554
Measured	2879.45	0.983855
Measured	2879.53	0.984191
Measured	2879.6	0.984187
Measured	2879.68	0.983677
Measured	2879.75	0.983537
Measured	2879.82	0.984389
Measured	2879.9	0.985445
Measured	2879.97	0.985708
Measured	2880.05	0.985629
Measured	2880.12	0.986158
Measured	2880.2	0.986782
Measured	2880.28	0.986511
Measured	2880.35	0.98609
Measured	2880.43	0.986621
Measured	2880.5	0.987777
Measured	2880.57	0.988602
Measured	2880.65	0.988715
Measured	2880.72	0.988388
Measured	2880.8	0.988232
Measured	2880.88	0.988184
Measured	2880.95	0.988211
Measured	2881.03	0.988851
Measured	2881.1	0.989362
Measured	2881.18	0.988515
Measured	2881.25	0.987809
Measured	2881.32	0.98876
Measured	2881.4	0.989417
Measured	2881.47	0.988566
Measured	2881.55	0.988165
Measured	2881.62	0.988943
Measured	2881.7	0.989577
Measured	2881.78	0.989955
Measured	2881.85	0.990541
Measured	2881.93	0.990944
Measured	2882	0.990989
Measured	2882.07	0.990923
Measured	2882.15	0.990937
Measured	2882.22	0.991325
Measured	2882.3	0.991806
Measured	2882.38	0.991891
Measured	2882.45	0.992176
Measured	2882.53	0.992787
Measured	2882.6	0.992285
Measured	2882.68	0.990958
Measured	2882.75	0.990877
Measured	2882.82	0.992007
Measured	2882.9	0.992739
Measured	2882.97	0.993002
Measured	2883.05	0.992924
Measured	2883.12	0.991924
Measured	2883.2	0.990848
Measured	2883.28	0.991105
Measured	2883.35	0.99197
Measured	2883.43	0.991939
Measured	2883.5	0.991409
Measured	2883.57	0.99174
Measured	2883.65	0.992953
Measured	2883.72	0.993787
Measured	2883.8	0.993638
Measured	2883.88	0.993364
Measured	2883.95	0.993812
Measured	2884.03	0.994362
Measured	2884.1	0.994064
Measured	2884.18	0.993445
Measured	2884.25	0.993726
Measured	2884.32	0.994655
Measured	2884.4	0.995126
Measured	2884.47	0.995054
Measured	2884.55	0.994649
Measured	2884.62	0.993867
Measured	2884.7	0.993999
Measured	2884.78	0.995737
Measured	2884.85	0.996086
Fitted	2855	0.991421
Fitted	2855.03	0.99138
Fitted	2855.06	0.991338
Fitted	2855.09	0.991297
Fitted	2855.12	0.991255
Fitted	2855.15	0.991213
Fitted	2855.18	0.99117
Fitted	2855.21	0.991128
Fitted	2855.24	0.991085
Fitted	2855.27	0.991042
Fitted	2855.3	0.990998
Fitted	2855.33	0.990954
Fitted	2855.36	0.99091
Fitted	2855.39	0.990866
Fitted	2855.42	0.990821
Fitted	2855.45	0.990776
Fitted	2855.48	0.990731
Fitted	2855.51	0.990685
Fitted	2855.54	0.990639
Fitted	2855.57	0.990593
Fitted	2855.6	0.990547
Fitted	2855.63	0.9905
Fitted	2855.66	0.990453
Fitted	2855.69	0.990405
Fitted	2855.72	0.990357
Fitted	2855.75	0.990309
Fitted	2855.78	0.990261
Fitted	2855.81	0.990212
Fitted	2855.84	0.990163
Fitted	2855.87	0.990114
Fitted	2855.9	0.990064
Fitted	2855.93	0.990014
Fitted	2855.96	0.989963
Fitted	2855.99	0.989913
Fitted	2856.02	0.989861
Fitted	2856.05	0.98981
Fitted	2856.08	0.989758
Fitted	2856.11	0.989706
Fitted	2856.14	0.989654
Fitted	2856.17	0.989601
Fitted	2856.2	0.989547
Fitted	2856.23	0.989494
Fitted	2856.25	0.98944
Fitted	2856.28	0.989386
Fitted	2856.31	0.989331
Fitted	2856.34	0.989276
Fitted	2856.37	0.98922
Fitted	2856.4	0.989165
Fitted	2856.43	0.989108
Fitted	2856.46	0.989052
Fitted	2856.49	0.988995
Fitted	2856.52	0.988938
Fitted	2856.55	0.98888
Fitted	2856.58	0.988822
Fitted	2856.61	0.988763
Fitted	2856.64	0.988704
Fitted	2856.67	0.988645
Fitted	2856.7	0.988585
Fitted	2856.73	0.988525
Fitted	2856.76	0.988465
Fitted	2856.79	0.988404
Fitted	2856.82	0.988343
Fitted	2856.85	0.988281
Fitted	2856.88	0.988219
Fitted	2856.91	0.988156
Fitted	2856.94	0.988093
Fitted	2856.97	0.98803
Fitted	2857	0.987966
Fitted	2857.03	0.987901
Fitted	2857.06	0.987837
Fitted	2857.09	0.987772
Fitted	2857.12	0.987706
Fitted	2857.15	0.98764
Fitted	2857.18	0.987573
Fitted	2857.21	0.987506
Fitted	2857.24	0.987439
Fitted	2857.27	0.987371
Fitted	2857.3	0.987303
Fitted	2857.33	0.987234
Fitted	2857.36	0.987165
Fitted	2857.39	0.987095
Fitted	2857.42	0.987025
Fitted	2857.45	0.986955
Fitted	2857.48	0.986884
Fitted	2857.51	0.986812
Fitted	2857.54	0.98674
Fitted	2857.57	0.986668
Fitted	2857.6	0.986595
Fitted	2857.63	0.986521
Fitted	2857.66	0.986447
Fitted	2857.69	0.986373
Fitted	2857.72	0.986298
Fitted	2857.75	0.986223
Fitted	2857.78	0.986147
Fitted	2857.81	0.986071
Fitted	2857.84	0.985994
Fitted	2857.87	0.985916
Fitted	2857.9	0.985839
Fitted	2857.93	0.98576
Fitted	2857.96	0.985681
Fitted	2857.99	0.985602
Fitted	2858.02	0.985522
Fitted	2858.05	0.985442
Fitted	2858.08	0.985361
Fitted	2858.11	0.98528
Fitted	2858.14	0.985198
Fitted	2858.17	0.985115
Fitted	2858.2	0.985032
Fitted	2858.23	0.984949
Fitted	2858.26	0.984865
Fitted	2858.29	0.98478
Fitted	2858.32	0.984695
Fitted	2858.35	0.98461
Fitted	2858.38	0.984524
Fitted	2858.41	0.984437
Fitted	2858.44	0.98435
Fitted	2858.47	0.984263
Fitted	2858.5	0.984174
Fitted	2858.53	0.984086
Fitted	2858.56	0.983997
Fitted	2858.59	0.983907
Fitted	2858.62	0.983817
Fitted	2858.65	0.983726
Fitted	2858.68	0.983634
Fitted	2858.71	0.983543
Fitted	2858.73	0.98345
Fitted	2858.76	0.983357
Fitted	2858.79	0.983264
Fitted	2858.82	0.98317
Fitted	2858.85	0.983076
Fitted	2858.88	0.982981
Fitted	2858.91	0.982885
Fitted	2858.94	0.982789
Fitted	2858.97	0.982692
Fitted	2859	0.982595
Fitted	2859.03	0.982498
Fitted	2859.06	0.9824
Fitted	2859.09	0.982301
Fitted	2859.12	0.982202
Fitted	2859.15	0.982102
Fitted	2859.18	0.982002
Fitted	2859.21	0.981901
Fitted	2859.24	0.9818
Fitted	2859.27	0.981698
Fitted	2859.3	0.981596
Fitted	2859.33	0.981493
Fitted	2859.36	0.98139
Fitted	2859.39	0.981286
Fitted	2859.42	0.981182
Fitted	2859.45	0.981077
Fitted	2859.48	0.980972
Fitted	2859.51	0.980867
Fitted	2859.54	0.980761
Fitted	2859.57	0.980654
Fitted	2859.6	0.980547
Fitted	2859.63	0.980439
Fitted	2859.66	0.980331
Fitted	2859.69	0.980223
Fitted	2859.72	0.980114
Fitted	2859.75	0.980005
Fitted	2859.78	0.979895
Fitted	2859.81	0.979785
Fitted	2859.84	0.979675
Fitted	2859.87	0.979564
Fitted	2859.9	0.979452
Fitted	2859.93	0.979341
Fitted	2859.96	0.979229
Fitted	2859.99	0.979116
Fitted	2860.02	0.979003
Fitted	2860.05	0.97889
Fitted	2860.08	0.978776
Fitted	2860.11	0.978662
Fitted	2860.14	0.978548
Fitted	2860.17	0.978434
Fitted	2860.2	0.978319
Fitted	2860.23	0.978204
Fitted	2860.26	0.978088
Fitted	2860.29	0.977972
Fitted	2860.32	0.977856
Fitted	2860.35	0.97774
Fitted	2860.38	0.977624
Fitted	2860.41	0.977507
Fitted	2860.44	0.97739
Fitted	2860.47	0.977273
Fitted	2860.5	0.977155
Fitted	2860.53	0.977038
Fitted	2860.56	0.97692
Fitted	2860.59	0.976802
Fitted	2860.62	0.976684
Fitted	2860.65	0.976566
Fitted	2860.68	0.976448
Fitted	2860.71	0.97633
Fitted	2860.74	0.976211
Fitted	2860.77	0.976093
Fitted	2860.8	0.975974
Fitted	2860.83	0.975856
Fitted	2860.86	0.975738
Fitted	2860.89	0.975619
Fitted	2860.92	0.975501
Fitted	2860.95	0.975382
Fitted	2860.98	0.975264
Fitted	2861.01	0.975146
Fitted	2861.04	0.975028
Fitted	2861.07	0.97491
Fitted	2861.1	0.974792
Fitted	2861.13	0.974674
Fitted	2861.16	0.974557
Fitted	2861.19	0.974439
Fitted	2861.22	0.974322
Fitted	2861.24	0.974206
Fitted	2861.27	0.974089
Fitted	2861.3	0.973973
Fitted	2861.33	0.973857
Fitted	2861.36	0.973742
Fitted	2861.39	0.973626
Fitted	2861.42	0.973512
Fitted	2861.45	0.973397
Fitted	2861.48	0.973283
Fitted	2861.51	0.97317
Fitted	2861.54	0.973057
Fitted	2861.57	0.972945
Fitted	2861.6	0.972833
Fitted	2861.63	0.972721
Fitted	2861.66	0.972611
Fitted	2861.69	0.972501
Fitted	2861.72	0.972391
Fitted	2861.75	0.972282
Fitted	2861.78	0.972174
Fitted	2861.81	0.972067
Fitted	2861.84	0.97196
Fitted	2861.87	0.971854
Fitted	2861.9	0.971749
Fitted	2861.93	0.971645
Fitted	2861.96	0.971542
Fitted	2861.99	0.971439
Fitted	2862.02	0.971338
Fitted	2862.05	0.971237
Fitted	2862.08	0.971137
Fitted	2862.11	0.971038
Fitted	2862.14	0.970941
Fitted	2862.17	0.970844
Fitted	2862.2	0.970748
Fitted	2862.23	0.970654
Fitted	2862.26	0.970561
Fitted	2862.29	0.970468
Fitted	2862.32	0.970377
Fitted	2862.35	0.970287
Fitted	2862.38	0.970199
Fitted	2862.41	0.970111
Fitted	2862.44	0.970025
Fitted	2862.47	0.96994
Fitted	2862.5	0.969857
Fitted	2862.53	0.969775
Fitted	2862.56	0.969694
Fitted	2862.59	0.969615
Fitted	2862.62	0.969537
Fitted	2862.65	0.96946
Fitted	2862.68	0.969385
Fitted	2862.71	0.969311
Fitted	2862.74	0.969239
Fitted	2862.77	0.969169
Fitted	2862.8	0.9691
Fitted	2862.83	0.969032
Fitted	2862.86	0.968966
Fitted	2862.89	0.968902
Fitted	2862.92	0.968839
Fitted	2862.95	0.968778
Fitted	2862.98	0.968719
Fitted	2863.01	0.968661
Fitted	2863.04	0.968605
Fitted	2863.07	0.968551
Fitted	2863.1	0.968498
Fitted	2863.13	0.968448
Fitted	2863.16	0.968398
Fitted	2863.19	0.968351
Fitted	2863.22	0.968306
Fitted	2863.25	0.968262
Fitted	2863.28	0.96822
Fitted	2863.31	0.96818
Fitted	2863.34	0.968141
Fitted	2863.37	0.968105
Fitted	2863.4	0.96807
Fitted	2863.43	0.968037
Fitted	2863.46	0.968006
Fitted	2863.49	0.967977
Fitted	2863.52	0.967949
Fitted	2863.55	0.967924
Fitted	2863.58	0.9679
Fitted	2863.61	0.967878
Fitted	2863.64	0.967858
Fitted	2863.67	0.96784
Fitted	2863.7	0.967824
Fitted	2863.72	0.967809
Fitted	2863.75	0.967796
Fitted	2863.78	0.967786
Fitted	2863.81	0.967777
Fitted	2863.84	0.96777
Fitted	2863.87	0.967764
Fitted	2863.9	0.967761
Fitted	2863.93	0.967759
Fitted	2863.96	0.967759
Fitted	2863.99	0.967761
Fitted	2864.02	0.967765
Fitted	2864.05	0.96777
Fitted	2864.08	0.967778
Fitted	2864.11	0.967787
Fitted	2864.14	0.967797
Fitted	2864.17	0.96781
Fitted	2864.2	0.967824
Fitted	2864.23	0.96784
Fitted	2864.26	0.967857
Fitted	2864.29	0.967877
Fitted	2864.32	0.967897
Fitted	2864.35	0.96792
Fitted	2864.38	0.967944
Fitted	2864.41	0.967969
Fitted	2864.44	0.967996
Fitted	2864.47	0.968025
Fitted	2864.5	0.968055
Fitted	2864.53	0.968087
Fitted	2864.56	0.96812
Fitted	2864.59	0.968155
Fitted	2864.62	0.968191
Fitted	2864.65	0.968229
Fitted	2864.68	0.968267
Fitted	2864.71	0.968308
Fitted	2864.74	0.968349
Fitted	2864.77	0.968392
Fitted	2864.8	0.968436
Fitted	2864.83	0.968482
Fitted	2864.86	0.968528
Fitted	2864.89	0.968576
Fitted	2864.92	0.968625
Fitted	2864.95	0.968675
Fitted	2864.98	0.968727
Fitted	2865.01	0.968779
Fitted	2865.04	0.968832
Fitted	2865.07	0.968887
Fitted	2865.1	0.968942
Fitted	2865.13	0.968999
Fitted	2865.16	0.969056
Fitted	2865.19	0.969115
Fitted	2865.22	0.969174
Fitted	2865.25	0.969234
Fitted	2865.28	0.969295
Fitted	2865.31	0.969357
Fitted	2865.34	0.96942
Fitted	2865.37	0.969483
Fitted	2865.4	0.969547
Fitted	2865.43	0.969612
Fitted	2865.46	0.969677
Fitted	2865.49	0.969743
Fitted	2865.52	0.96981
Fitted	2865.55	0.969877
Fitted	2865.58	0.969945
Fitted	2865.61	0.970013
Fitted	2865.64	0.970082
Fitted	2865.67	0.970151
Fitted	2865.7	0.970221
Fitted	2865.73	0.970291
Fitted	2865.76	0.970362
Fitted	2865.79	0.970433
Fitted	2865.82	0.970504
Fitted	2865.85	0.970576
Fitted	2865.88	0.970648
Fitted	2865.91	0.97072
Fitted	2865.94	0.970792
Fitted	2865.97	0.970865
Fitted	2866	0.970937
Fitted	2866.03	0.97101
Fitted	2866.06	0.971083
Fitted	2866.09	0.971156
Fitted	2866.12	0.97123
Fitted	2866.15	0.971303
Fitted	2866.18	0.971376
Fitted	2866.2	0.97145
Fitted	2866.23	0.971523
Fitted	2866.26	0.971596
Fitted	2866.29	0.971669
Fitted	2866.32	0.971743
Fitted	2866.35	0.971816
Fitted	2866.38	0.971889
Fitted	2866.41	0.971961
Fitted	2866.44	0.972034
Fitted	2866.47	0.972106
Fitted	2866.5	0.972179
Fitted	2866.53	0.972251
Fitted	2866.56	0.972322
Fitted	2866.59	0.972394
Fitted	2866.62	0.972465
Fitted	2866.65	0.972536
Fitted	2866.68	0.972607
Fitted	2866.71	0.972677
Fitted	2866.74	0.972747
Fitted	2866.77	0.972816
Fitted	2866.8	0.972886
Fitted	2866.83	0.972954
Fitted	2866.86	0.973023
Fitted	2866.89	0.973091
Fitted	2866.92	0.973158
Fitted	2866.95	0.973225
Fitted	2866.98	0.973292
Fitted	2867.01	0.973358
Fitted	2867.04	0.973423
Fitted	2867.07	0.973488
Fitted	2867.1	0.973553
Fitted	2867.13	0.973617
Fitted	2867.16	0.97368
Fitted	2867.19	0.973743
Fitted	2867.22	0.973806
Fitted	2867.25	0.973867
Fitted	2867.28	0.973928
Fitted	2867.31	0.973989
Fitted	2867.34	0.974049
Fitted	2867.37	0.974108
Fitted	2867.4	0.974166
Fitted	2867.43	0.974224
Fitted	2867.46	0.974281
Fitted	2867.49	0.974338
Fitted	2867.52	0.974394
Fitted	2867.55	0.974449
Fitted	2867.58	0.974503
Fitted	2867.61	0.974557
Fitted	2867.64	0.97461
Fitted	2867.67	0.974662
Fitted	2867.7	0.974714
Fitted	2867.73	0.974765
Fitted	2867.76	0.974815
Fitted	2867.79	0.974864
Fitted	2867.82	0.974913
Fitted	2867.85	0.97496
Fitted	2867.88	0.975007
Fitted	2867.91	0.975054
Fitted	2867.94	0.975099
Fitted	2867.97	0.975144
Fitted	2868	0.975187
Fitted	2868.03	0.975231
Fitted	2868.06	0.975273
Fitted	2868.09	0.975314
Fitted	2868.12	0.975355
Fitted	2868.15	0.975394
Fitted	2868.18	0.975433
Fitted	2868.21	0.975471
Fitted	2868.24	0.975508
Fitted	2868.27	0.975545
Fitted	2868.3	0.97558
Fitted	2868.33	0.975615
Fitted	2868.36	0.975649
Fitted	2868.39	0.975682
Fitted	2868.42	0.975714
Fitted	2868.45	0.975745
Fitted	2868.48	0.975775
Fitted	2868.51	0.975805
Fitted	2868.54	0.975834
Fitted	2868.57	0.975861
Fitted	2868.6	0.975888
Fitted	2868.63	0.975914
Fitted	2868.66	0.975939
Fitted	2868.68	0.975963
Fitted	2868.71	0.975987
Fitted	2868.74	0.976009
Fitted	2868.77	0.976031
Fitted	2868.8	0.976051
Fitted	2868.83	0.976071
Fitted	2868.86	0.97609
Fitted	2868.89	0.976108
Fitted	2868.92	0.976125
Fitted	2868.95	0.976141
Fitted	2868.98	0.976157
Fitted	2869.01	0.976171
Fitted	2869.04	0.976185
Fitted	2869.07	0.976197
Fitted	2869.1	0.976209
Fitted	2869.13	0.97622
Fitted	2869.16	0.97623
Fitted	2869.19	0.976239
Fitted	2869.22	0.976247
Fitted	2869.25	0.976254
Fitted	2869.28	0.976261
Fitted	2869.31	0.976266
Fitted	2869.34	0.976271
Fitted	2869.37	0.976274
Fitted	2869.4	0.976277
Fitted	2869.43	0.976279
Fitted	2869.46	0.97628
Fitted	2869.49	0.97628
Fitted	2869.52	0.976279
Fitted	2869.55	0.976278
Fitted	2869.58	0.976275
Fitted	2869.61	0.976272
Fitted	2869.64	0.976267
Fitted	2869.67	0.976262
Fitted	2869.7	0.976256
Fitted	2869.73	0.976249
Fitted	2869.76	0.976241
Fitted	2869.79	0.976233
Fitted	2869.82	0.976223
Fitted	2869.85	0.976213
Fitted	2869.88	0.976202
Fitted	2869.91	0.97619
Fitted	2869.94	0.976177
Fitted	2869.97	0.976163
Fitted	2870	0.976148
Fitted	2870.03	0.976133
Fitted	2870.06	0.976117
Fitted	2870.09	0.9761
Fitted	2870.12	0.976082
Fitted	2870.15	0.976063
Fitted	2870.18	0.976043
Fitted	2870.21	0.976023
Fitted	2870.24	0.976002
Fitted	2870.27	0.97598
Fitted	2870.3	0.975957
Fitted	2870.33	0.975933
Fitted	2870.36	0.975909
Fitted	2870.39	0.975884
Fitted	2870.42	0.975858
Fitted	2870.45	0.975831
Fitted	2870.48	0.975804
Fitted	2870.51	0.975776
Fitted	2870.54	0.975747
Fitted	2870.57	0.975717
Fitted	2870.6	0.975686
Fitted	2870.63	0.975655
Fitted	2870.66	0.975623
Fitted	2870.69	0.975591
Fitted	2870.72	0.975557
Fitted	2870.75	0.975523
Fitted	2870.78	0.975489
Fitted	2870.81	0.975453
Fitted	2870.84	0.975417
Fitted	2870.87	0.975381
Fitted	2870.9	0.975343
Fitted	2870.93	0.975305
Fitted	2870.96	0.975267
Fitted	2870.99	0.975227
Fitted	2871.02	0.975188
Fitted	2871.05	0.975147
Fitted	2871.08	0.975106
Fitted	2871.11	0.975064
Fitted	2871.14	0.975022
Fitted	2871.17	0.974979
Fitted	2871.19	0.974936
Fitted	2871.22	0.974892
Fitted	2871.25	0.974848
Fitted	2871.28	0.974803
Fitted	2871.31	0.974758
Fitted	2871.34	0.974712
Fitted	2871.37	0.974665
Fitted	2871.4	0.974619
Fitted	2871.43	0.974571
Fitted	2871.46	0.974524
Fitted	2871.49	0.974476
Fitted	2871.52	0.974427
Fitted	2871.55	0.974378
Fitted	2871.58	0.974329
Fitted	2871.61	0.974279
Fitted	2871.64	0.97423
Fitted	2871.67	0.974179
Fitted	2871.7	0.974129
Fitted	2871.73	0.974078
Fitted	2871.76	0.974027
Fitted	2871.79	0.973975
Fitted	2871.82	0.973924
Fitted	2871.85	0.973872
Fitted	2871.88	0.97382
Fitted	2871.91	0.973768
Fitted	2871.94	0.973715
Fitted	2871.97	0.973663
Fitted	2872	0.97361
Fitted	2872.03	0.973557
Fitted	2872.06	0.973504
Fitted	2872.09	0.973452
Fitted	2872.12	0.973399
Fitted	2872.15	0.973346
Fitted	2872.18	0.973293
Fitted	2872.21	0.97324
Fitted	2872.24	0.973187
Fitted	2872.27	0.973134
Fitted	2872.3	0.973081
Fitted	2872.33	0.973028
Fitted	2872.36	0.972976
Fitted	2872.39	0.972923
Fitted	2872.42	0.972871
Fitted	2872.45	0.972819
Fitted	2872.48	0.972767
Fitted	2872.51	0.972716
Fitted	2872.54	0.972664
Fitted	2872.57	0.972613
Fitted	2872.6	0.972562
Fitted	2872.63	0.972512
Fitted	2872.66	0.972462
Fitted	2872.69	0.972412
Fitted	2872.72	0.972363
Fitted	2872.75	0.972314
Fitted	2872.78	0.972266
Fitted	2872.81	0.972218
Fitted	2872.84	0.972171
Fitted	2872.87	0.972124
Fitted	2872.9	0.972078
Fitted	2872.93	0.972032
Fitted	2872.96	0.971987
Fitted	2872.99	0.971943
Fitted	2873.02	0.971899
Fitted	2873.05	0.971856
Fitted	2873.08	0.971813
Fitted	2873.11	0.971772
Fitted	2873.14	0.971731
Fitted	2873.17	0.971691
Fitted	2873.2	0.971651
Fitted	2873.23	0.971613
Fitted	2873.26	0.971575
Fitted	2873.29	0.971539
Fitted	2873.32	0.971503
Fitted	2873.35	0.971468
Fitted	2873.38	0.971434
Fitted	2873.41	0.971401
Fitted	2873.44	0.971369
Fitted	2873.47	0.971338
Fitted	2873.5	0.971308
Fitted	2873.53	0.971279
Fitted	2873.56	0.971252
Fitted	2873.59	0.971225
Fitted	2873.62	0.971199
Fitted	2873.65	0.971175
Fitted	2873.67	0.971152
Fitted	2873.7	0.97113
Fitted	2873.73	0.971109
Fitted	2873.76	0.97109
Fitted	2873.79	0.971071
Fitted	2873.82	0.971054
Fitted	2873.85	0.971039
Fitted	2873.88	0.971024
Fitted	2873.91	0.971011
Fitted	2873.94	0.971
Fitted	2873.97	0.970989
Fitted	2874	0.97098
Fitted	2874.03	0.970973
Fitted	2874.06	0.970966
Fitted	2874.09	0.970962
Fitted	2874.12	0.970958
Fitted	2874.15	0.970956
Fitted	2874.18	0.970956
Fitted	2874.21	0.970957
Fitted	2874.24	0.970959
Fitted	2874.27	0.970963
Fitted	2874.3	0.970969
Fitted	2874.33	0.970976
Fitted	2874.36	0.970984
Fitted	2874.39	0.970994
Fitted	2874.42	0.971006
Fitted	2874.45	0.971019
Fitted	2874.48	0.971034
Fitted	2874.51	0.97105
Fitted	2874.54	0.971067
Fitted	2874.57	0.971087
Fitted	2874.6	0.971108
Fitted	2874.63	0.97113
Fitted	2874.66	0.971154
Fitted	2874.69	0.971179
Fitted	2874.72	0.971206
Fitted	2874.75	0.971235
Fitted	2874.78	0.971265
Fitted	2874.81	0.971297
Fitted	2874.84	0.97133
Fitted	2874.87	0.971365
Fitted	2874.9	0.971401
Fitted	2874.93	0.971439
Fitted	2874.96	0.971478
Fitted	2874.99	0.971519
Fitted	2875.02	0.971561
Fitted	2875.05	0.971605
Fitted	2875.08	0.97165
Fitted	2875.11	0.971697
Fitted	2875.14	0.971746
Fitted	2875.17	0.971795
Fitted	2875.2	0.971846
Fitted	2875.23	0.971899
Fitted	2875.26	0.971953
Fitted	2875.29	0.972009
Fitted	2875.32	0.972066
Fitted	2875.35	0.972124
Fitted	2875.38	0.972183
Fitted	2875.41	0.972244
Fitted	2875.44	0.972307
Fitted	2875.47	0.97237
Fitted	2875.5	0.972435
Fitted	2875.53	0.972502
Fitted	2875.56	0.972569
Fitted	2875.59	0.972638
Fitted	2875.62	0.972708
Fitted	2875.65	0.972779
Fitted	2875.68	0.972851
Fitted	2875.71	0.972925
Fitted	2875.74	0.973
Fitted	2875.77	0.973076
Fitted	2875.8	0.973153
Fitted	2875.83	0.973231
Fitted	2875.86	0.97331
Fitted	2875.89	0.97339
Fitted	2875.92	0.973471
Fitted	2875.95	0.973554
Fitted	2875.98	0.973637
Fitted	2876.01	0.973721
Fitted	2876.04	0.973806
Fitted	2876.07	0.973892
Fitted	2876.1	0.973979
Fitted	2876.13	0.974067
Fitted	2876.15	0.974156
Fitted	2876.18	0.974245
Fitted	2876.21	0.974336
Fitted	2876.24	0.974427
Fitted	2876.27	0.974519
Fitted	2876.3	0.974611
Fitted	2876.33	0.974705
Fitted	2876.36	0.974799
Fitted	2876.39	0.974893
Fitted	2876.42	0.974989
Fitted	2876.45	0.975085
Fitted	2876.48	0.975181
Fitted	2876.51	0.975278
Fitted	2876.54	0.975376
Fitted	2876.57	0.975474
Fitted	2876.6	0.975573
Fitted	2876.63	0.975672
Fitted	2876.66	0.975772
Fitted	2876.69	0.975872
Fitted	2876.72	0.975973
Fitted	2876.75	0.976074
Fitted	2876.78	0.976176
Fitted	2876.81	0.976277
Fitted	2876.84	0.976379
Fitted	2876.87	0.976482
Fitted	2876.9	0.976585
Fitted	2876.93	0.976688
Fitted	2876.96	0.976791
Fitted	2876.99	0.976895
Fitted	2877.02	0.976998
Fitted	2877.05	0.977102
Fitted	2877.08	0.977207
Fitted	2877.11	0.977311
Fitted	2877.14	0.977415
Fitted	2877.17	0.97752
Fitted	2877.2	0.977625
Fitted	2877.23	0.97773
Fitted	2877.26	0.977835
Fitted	2877.29	0.97794
Fitted	2877.32	0.978045
Fitted	2877.35	0.97815
Fitted	2877.38	0.978255
Fitted	2877.41	0.97836
Fitted	2877.44	0.978465
Fitted	2877.47	0.97857
Fitted	2877.5	0.978675
Fitted	2877.53	0.97878
Fitted	2877.56	0.978885
Fitted	2877.59	0.97899
Fitted	2877.62	0.979094
Fitted	2877.65	0.979199
Fitted	2877.68	0.979303
Fitted	2877.71	0.979408
Fitted	2877.74	0.979512
Fitted	2877.77	0.979616
Fitted	2877.8	0.979719
Fitted	2877.83	0.979823
Fitted	2877.86	0.979926
Fitted	2877.89	0.98003
Fitted	2877.92	0.980133
Fitted	2877.95	0.980235
Fitted	2877.98	0.980338
Fitted	2878.01	0.98044
Fitted	2878.04	0.980542
Fitted	2878.07	0.980644
Fitted	2878.1	0.980745
Fitted	2878.13	0.980846
Fitted	2878.16	0.980947
Fitted	2878.19	0.981048
Fitted	2878.22	0.981148
Fitted	2878.25	0.981248
Fitted	2878.28	0.981347
Fitted	2878.31	0.981447
Fitted	2878.34	0.981546
Fitted	2878.37	0.981644
Fitted	2878.4	0.981742
Fitted	2878.43	0.98184
Fitted	2878.46	0.981938
Fitted	2878.49	0.982035
Fitted	2878.52	0.982131
Fitted	2878.55	0.982228
Fitted	2878.58	0.982324
Fitted	2878.61	0.982419
Fitted	2878.63	0.982514
Fitted	2878.66	0.982609
Fitted	2878.69	0.982703
Fitted	2878.72	0.982797
Fitted	2878.75	0.982891
Fitted	2878.78	0.982984
Fitted	2878.81	0.983077
Fitted	2878.84	0.983169
Fitted	2878.87	0.983261
Fitted	2878.9	0.983352
Fitted	2878.93	0.983443
Fitted	2878.96	0.983533
Fitted	2878.99	0.983623
Fitted	2879.02	0.983713
Fitted	2879.05	0.983802
Fitted	2879.08	0.983891
Fitted	2879.11	0.983979
Fitted	2879.14	0.984067
Fitted	2879.17	0.984154
Fitted	2879.2	0.984241
Fitted	2879.23	0.984328
Fitted	2879.26	0.984413
Fitted	2879.29	0.984499
Fitted	2879.32	0.984584
Fitted	2879.35	0.984669
Fitted	2879.38	0.984753
Fitted	2879.41	0.984836
Fitted	2879.44	0.98492
Fitted	2879.47	0.985002
Fitted	2879.5	0.985085
Fitted	2879.53	0.985166
Fitted	2879.56	0.985248
Fitted	2879.59	0.985329
Fitted	2879.62	0.985409
Fitted	2879.65	0.985489
Fitted	2879.68	0.985568
Fitted	2879.71	0.985647
Fitted	2879.74	0.985726
Fitted	2879.77	0.985804
Fitted	2879.8	0.985882
Fitted	2879.83	0.985959
Fitted	2879.86	0.986035
Fitted	2879.89	0.986112
Fitted	2879.92	0.986187
Fitted	2879.95	0.986263
Fitted	2879.98	0.986338
Fitted	2880.01	0.986412
Fitted	2880.04	0.986486
Fitted	2880.07	0.986559
Fitted	2880.1	0.986632
Fitted	2880.13	0.986705
Fitted	2880.16	0.986777
Fitted	2880.19	0.986849
Fitted	2880.22	0.98692
Fitted	2880.25	0.986991
Fitted	2880.28	0.987061
Fitted	2880.31	0.987131
Fitted	2880.34	0.987201
Fitted	2880.37	0.98727
Fitted	2880.4	0.987338
Fitted	2880.43	0.987406
Fitted	2880.46	0.987474
Fitted	2880.49	0.987541
Fitted	2880.52	0.987608
Fitted	2880.55	0.987674
Fitted	2880.58	0.98774
Fitted	2880.61	0.987806
Fitted	2880.64	0.987871
Fitted	2880.67	0.987936
Fitted	2880.7	0.988
Fitted	2880.73	0.988064
Fitted	2880.76	0.988128
Fitted	2880.79	0.988191
Fitted	2880.82	0.988253
Fitted	2880.85	0.988315
Fitted	2880.88	0.988377
Fitted	2880.91	0.988439
Fitted	2880.94	0.9885
Fitted	2880.97	0.98856
Fitted	2881	0.98862
Fitted	2881.03	0.98868
Fitted	2881.06	0.98874
Fitted	2881.09	0.988799
Fitted	2881.12	0.988857
Fitted	2881.14	0.988916
Fitted	2881.17	0.988974
Fitted	2881.2	0.989031
Fitted	2881.23	0.989088
Fitted	2881.26	0.989145
Fitted	2881.29	0.989201
Fitted	2881.32	0.989257
Fitted	2881.35	0.989313
Fitted	2881.38	0.989368
Fitted	2881.41	0.989423
Fitted	2881.44	0.989477
Fitted	2881.47	0.989532
Fitted	2881.5	0.989585
Fitted	2881.53	0.989639
Fitted	2881.56	0.989692
Fitted	2881.59	0.989744
Fitted	2881.62	0.989797
Fitted	2881.65	0.989849
Fitted	2881.68	0.989901
Fitted	2881.71	0.989952
Fitted	2881.74	0.990003
Fitted	2881.77	0.990053
Fitted	2881.8	0.990104
Fitted	2881.83	0.990154
Fitted	2881.86	0.990203
Fitted	2881.89	0.990253
Fitted	2881.92	0.990302
Fitted	2881.95	0.99035
Fitted	2881.98	0.990399
Fitted	2882.01	0.990447
Fitted	2882.04	0.990494
Fitted	2882.07	0.990542
Fitted	2882.1	0.990589
Fitted	2882.13	0.990635
Fitted	2882.16	0.990682
Fitted	2882.19	0.990728
Fitted	2882.22	0.990774
Fitted	2882.25	0.990819
Fitted	2882.28	0.990865
Fitted	2882.31	0.990909
Fitted	2882.34	0.990954
Fitted	2882.37	0.990998
Fitted	2882.4	0.991042
Fitted	2882.43	0.991086
Fitted	2882.46	0.99113
Fitted	2882.49	0.991173
Fitted	2882.52	0.991216
Fitted	2882.55	0.991258
Fitted	2882.58	0.9913
Fitted	2882.61	0.991342
Fitted	2882.64	0.991384
Fitted	2882.67	0.991426
Fitted	2882.7	0.991467
Fitted	2882.73	0.991508
Fitted	2882.76	0.991548
Fitted	2882.79	0.991589
Fitted	2882.82	0.991629
Fitted	2882.85	0.991669
Fitted	2882.88	0.991708
Fitted	2882.91	0.991748
Fitted	2882.94	0.991787
Fitted	2882.97	0.991826
Fitted	2883	0.991864
Fitted	2883.03	0.991902
Fitted	2883.06	0.991941
Fitted	2883.09	0.991978
Fitted	2883.12	0.992016
Fitted	2883.15	0.992053
Fitted	2883.18	0.99209
Fitted	2883.21	0.992127
Fitted	2883.24	0.992164
Fitted	2883.27	0.9922
Fitted	2883.3	0.992236
Fitted	2883.33	0.992272
Fitted	2883.36	0.992308
Fitted	2883.39	0.992343
Fitted	2883.42	0.992379
Fitted	2883.45	0.992413
Fitted	2883.48	0.992448
Fitted	2883.51	0.992483
Fitted	2883.54	0.992517
Fitted	2883.57	0.992551
Fitted	2883.6	0.992585
Fitted	2883.62	0.992619
Fitted	2883.65	0.992652
Fitted	2883.68	0.992685
Fitted	2883.71	0.992718
Fitted	2883.74	0.992751
Fitted	2883.77	0.992784
Fitted	2883.8	0.992816
Fitted	2883.83	0.992848
Fitted	2883.86	0.99288
Fitted	2883.89	0.992912
Fitted	2883.92	0.992944
Fitted	2883.95	0.992975
Fitted	2883.98	0.993006
Fitted	2884.01	0.993037
Fitted	2884.04	0.993068
Fitted	2884.07	0.993099
Fitted	2884.1	0.993129
Fitted	2884.13	0.993159
Fitted	2884.16	0.993189
Fitted	2884.19	0.993219
Fitted	2884.22	0.993249
Fitted	2884.25	0.993278
Fitted	2884.28	0.993307
Fitted	2884.31	0.993336
Fitted	2884.34	0.993365
Fitted	2884.37	0.993394
Fitted	2884.4	0.993423
Fitted	2884.43	0.993451
Fitted	2884.46	0.993479
Fitted	2884.49	0.993507
Fitted	2884.52	0.993535
Fitted	2884.55	0.993563
Fitted	2884.58	0.99359
Fitted	2884.61	0.993618
Fitted	2884.64	0.993645
Fitted	2884.67	0.993672
Fitted	2884.7	0.993699
Fitted	2884.73	0.993725
Fitted	2884.76	0.993752
Fitted	2884.79	0.993778
Fitted	2884.82	0.993804
Fitted	2884.85	0.99383

## Sheet: Fig4G
Time	Counts
0.05	393225789
0.1	392500311
0.15	389179180
0.2	392422083
0.25	389670590
0.3	393407348
0.35	390147922
0.4	392190811
0.45	388697037
0.5	391974042
0.55	388555664
0.6	392491379
0.65	389288154
0.7	392782901
0.75	391066008
0.8	394942257
0.85	389960015
0.9	392444979
0.95	387941681
1	391012866
1.05	384622294
1.1	386559728
1.15	379938157
1.2	382249555
1.25	376843352
1.3	375542672
1.35	372175245
1.4	374179836
1.45	368369905
1.5	372157956
1.55	367425856
1.6	373919466
1.65	381174484
1.7	392297609
1.75	389905597
1.8	393146987
1.85	390861689
1.9	395838186
1.95	392625082
2	398559469
2.05	394035371
2.1	398619145
2.15	393620079
2.2	399159628
2.25	394898898
2.3	400138102
2.35	395650850
2.4	400094768
2.45	396403374
2.5	401404968
2.55	397057750
2.6	401153332
2.65	396206991
2.7	400726536
2.75	395482883
2.8	399646756
2.85	395314898
2.9	400436964
2.95	395465438
3	400743978
3.05	396023227
3.1	401505516
3.15	396920304
3.2	401220316
3.25	395411329
3.3	399397659
3.35	394327297
3.4	400656375
3.45	395501920
3.5	399138930
3.55	393720317
3.6	397805303
3.65	390038806
3.7	394629522
3.75	387406456
3.8	391513459
3.85	383706787
3.9	386431359
3.95	380419640
4	384201833
4.05	377535164
4.1	382282747
4.15	382914622
4.2	401500016
4.25	408204737
4.3	412210737
4.35	403506306
4.4	411682438
4.45	406230301
4.5	414254455
4.55	409881187
4.6	416930767
4.65	410832801
4.7	417491168
4.75	411338732
4.8	417841460
4.85	411549145
4.9	416911954
4.95	410197306
5	415690989
5.05	408853479
5.1	415301837
5.15	409738213
5.2	416160088
5.25	410218628
5.3	417546154
5.35	411679645
5.4	418561673
5.45	410771880
5.5	417411594
5.55	408627010
5.6	415214807
5.65	408524306
5.7	415853876
5.75	408345107
5.8	415083422
5.85	407612103
5.9	414066342
5.95	406318545
6	412693146
6.05	402625449
6.1	405387741
6.15	395802009
6.2	398514238
6.25	391034372
6.3	396663477
6.35	388646768
6.4	392593502
6.45	384104628
6.5	388603427
6.55	379313141
6.6	384430046
6.65	372785963
6.7	381274687
6.75	387658580
6.8	402161571
6.85	394153647
6.9	398911111
6.95	392845751
7	401263346
7.05	393150023
7.1	401419235
7.15	393386057
7.2	400207638
7.25	392376062
7.3	400355993
7.35	392639402
7.4	400515750
7.45	392757091
7.5	401114880
7.55	393639786
7.6	402122900
7.65	394461516
7.7	402238566
7.75	394100035
7.8	401414371
7.85	393288980
7.9	402606536
7.95	395636853
8	404212987
8.05	395192097
8.1	402926674
8.15	395426965
8.2	405225314
8.25	397504450
8.3	405002392
8.35	395872165
8.4	403662160
8.45	394801220
8.5	404251749
8.55	397562368
8.6	406491277
8.65	396250901
8.7	403638752
8.75	393180251
8.8	400658084
8.85	389831832
8.9	395332737
8.95	384049344
9	393246308
9.05	381038933
9.1	385623067
9.15	372396292
9.2	380243552
9.25	369466368
9.3	378025527
9.35	374639654
9.4	391385223
9.45	386021936
9.5	391588889
9.55	381475149
9.6	391481728
9.65	382156720
9.7	392447691
9.75	383364370
9.8	395295340
9.85	386543642
9.9	396558717
9.95	387369407
10	394722541
10.05	384750537
10.1	393226089
10.15	383826732
10.2	393763219
10.25	385638299
10.3	395950381
10.35	386907149
10.4	397648429
10.45	387929357
10.5	398281154
10.55	387377704
10.6	396975889
10.65	384843497
10.7	393348877
10.75	383506922
10.8	394175975
10.85	384581097
10.9	394862095
10.95	385327355
11	396322489
11.05	386374888
11.1	397538325
11.15	385375973
11.2	394908704
11.25	382466525
11.3	391302150
11.35	379361820
11.4	390591045
11.45	379586280
11.5	387885677
11.55	375793652
11.6	384313809
11.65	373950433
11.7	379783106
11.75	368182764
11.8	375582478
11.85	364135383
11.9	374617603
11.95	371436955
12	390952715
12.05	385314126
12.1	393602397
12.15	384289697
12.2	398683383
12.25	387403926
12.3	397848639
12.35	386552371
12.4	397165938
12.45	387507186
12.5	398711168
12.55	387220789
12.6	400192604
12.65	391321633
12.7	403513732
12.75	392237858
12.8	404874518
12.85	392537066
12.9	403503351
12.95	391122518
13	402784853
13.05	391280061
13.1	402834046
13.15	391642578
13.2	403000739
13.25	392515343
13.3	404398715
13.35	392973466
13.4	403709196
13.45	391243035
13.5	402637493
13.55	389562253
13.6	399210694
13.65	387201243
13.7	397025960
13.75	383224810
13.8	393226011
13.85	380591872
13.9	391359866
13.95	379363492
14	387710006
14.05	370995281
14.1	379771067
14.15	367960159
14.2	377945533
14.25	371630309
14.3	391515290
14.35	392372861
14.4	404331435
14.45	389793630
14.5	402764709
14.55	391523014
14.6	400928997
14.65	389820970
14.7	401664717
14.75	390423107
14.8	402452375
14.85	391420411
14.9	402346480
14.95	391281082
15	402858066
15.05	392039556
15.1	402671913
15.15	390898422
15.2	401959437
15.25	390028072
15.3	400733935
15.35	389630354
15.4	400963650
15.45	389959925
15.5	401375863
15.55	390828393
15.6	401146547
15.65	390492252
15.7	400692196
15.75	390327526
15.8	399183708
15.85	388873903
15.9	398720847
15.95	389178986
16	399212330
16.05	389557766
16.1	400157666
16.15	390313421
16.2	399984911
16.25	388054417
16.3	394290722
16.35	380623094
16.4	388217402
16.45	379733996
16.5	387349758
16.55	376208223
16.6	383331534
16.65	372005294
16.7	377606535
16.75	368199045
16.8	378082646
16.85	365447273
16.9	376430063
16.95	377240632
17	393781612
17.05	385438382
17.1	392047140
17.15	385979709
17.2	395743985
17.25	388143935
17.3	397778283
17.35	390021299
17.4	397553567
17.45	389273799
17.5	396540747
17.55	388614870
17.6	396808823
17.65	390204902
17.7	397808506
17.75	390315502
17.8	398716737
17.85	391632406
17.9	400053975
17.95	392851394
18	398303088
18.05	390356460
18.1	397270176
18.15	390590401
18.2	397745782
18.25	391622602
18.3	397974772
18.35	391250319
18.4	397941740
18.45	391424700
18.5	399129079
18.55	390918907
18.6	397312351
18.65	389251053
18.7	393864603
18.75	385816198
18.8	389502006
18.85	382551244
18.9	387437027
18.95	381199444
19	384419380
19.05	374039324
19.1	380320732
19.15	369802934
19.2	370632230
19.25	361076419
19.3	367117761
19.35	361374316
19.4	374501091
19.45	381464553
19.5	393200334
19.55	383524031
19.6	389843854
19.65	386397800
19.7	391825704
19.75	385207365
19.8	391826706
19.85	386335018
19.9	393167468
19.95	386916393
20	394626738
20.05	388311097
20.1	395768614
20.15	388909012
20.2	395396343
20.25	387407434
20.3	394362458
20.35	386254270
20.4	393089544
20.45	385663598
20.5	392355550
20.55	385317373
20.6	392584500
20.65	385399911
20.7	392604082
20.75	384963418
20.8	392619546
20.85	386409635
20.9	394767005
20.95	386407486
21	394036513
21.05	385854478
21.1	394388538
21.15	386222038
21.2	395521716
21.25	385209872
21.3	391972591
21.35	382603923
21.4	388281183
21.45	375677936
21.5	380405429
21.55	369579348
21.6	375484935
21.65	366288986
21.7	374215977
21.75	367500893
21.8	386062336
21.85	386214846
21.9	398424906
21.95	385396355
22	393840190
22.05	384969970
22.1	394124717
22.15	386574169
22.2	396612607
22.25	387858169
22.3	397940094
22.35	388610511
22.4	398599381
22.45	390027904
22.5	400570238
22.55	389600901
22.6	399063859
22.65	390721993
22.7	401677137
22.75	392698913
22.8	403790660
22.85	394401114
22.9	406238060
22.95	396506534
23	407068056
23.05	398732323
23.1	407966350
23.15	397371414
23.2	406879119
23.25	398055971
23.3	410208985
23.35	401935110
23.4	413704668
23.45	404795579
23.5	416617359
23.55	407404438
23.6	418017422
23.65	404340171
23.7	412819247
23.75	396886247
23.8	405681408
23.85	393379489
23.9	400502964
23.95	386214434
24	393329305
24.05	380708772
24.1	390767035
24.15	379256591
24.2	387963253
24.25	374465414
24.3	387642600
24.35	388845588
24.4	411276186
24.45	398203000
24.5	405828408
24.55	397919892
24.6	408988673
24.65	398517022
24.7	409811720
24.75	399144197
24.8	409046246
24.85	396239462
24.9	406795296
24.95	395993881
25	407063549
25.05	397443371
25.1	408409316
25.15	398764166
25.2	409415024
25.25	398893447
25.3	409525768
25.35	397174427
25.4	406110481
25.45	394221044
25.5	404494586
25.55	393815427
25.6	404993768
25.65	394552381
25.7	403680317
25.75	393308282
25.8	403185243
25.85	392604809
25.9	403008298
25.95	392842952
26	403577456
26.05	391140680
26.1	401217316
26.15	390029224
26.2	399291464
26.25	387312717
26.3	395111798
26.35	385179294
26.4	393816518
26.45	382009031
26.5	386705070
26.55	373485974
26.6	376705705
26.65	366077115
26.7	376402864
26.75	368227474
26.8	386277019
26.85	384099622
26.9	393741841
26.95	384142303
27	393734715
27.05	384358383
27.1	394638748
27.15	384184631
27.2	393806315
27.25	384141532
27.3	393862017
27.35	384334153
27.4	393163560
27.45	383801849
27.5	393072447
27.55	383888390
27.6	393562156
27.65	383557876
27.7	392866615
27.75	383933137
27.8	392368125
27.85	383664031
27.9	392437022
27.95	383630325
28	393225139
28.05	384480159
28.1	393481837
28.15	385105177
28.2	392493090
28.25	383209033
28.3	390540669
28.35	382360155
28.4	390901122
28.45	383741896
28.5	392057188
28.55	383745330
28.6	392062124
28.65	383230811
28.7	390025808
28.75	379819081
28.8	385977552
28.85	374290174
28.9	377919334
28.95	368697513
29	375247918
29.05	363924800
29.1	371753865
29.15	362036014
29.2	368430052
29.25	365365416
29.3	382967341
29.35	382195961
29.4	389139538
29.45	379996236
29.5	390293619
29.55	381419331
29.6	389438768
29.65	382712831
29.7	390984021
29.75	383979454
29.8	392786593
29.85	387080076
29.9	392819044
29.95	385103998
30	391057043
30.05	385529328
30.1	394001615
30.15	388174837
30.2	396152750
30.25	391289764
30.3	399151559
30.35	394084033
30.4	402085797
30.45	395043942
30.5	401909276
30.55	394084849
30.6	402522216
30.65	396950313
30.7	404706632
30.75	398838276
30.8	406341505
30.85	400861291
30.9	408502449
30.95	402639623
31	410009240
31.05	402221672
31.1	408386415
31.15	399347634
31.2	404390491
31.25	397144228
31.3	402727156
31.35	395147814
31.4	398605879
31.45	390566448
31.5	395820653
31.55	389420331
31.6	391896074
31.65	383359146
31.7	387812248
31.75	381689116
31.8	389126571
31.85	390035537
31.9	406433566
31.95	407716698
32	413888151
32.05	407161544
32.1	414911493
32.15	408658005
32.2	414415951
32.25	407705137
32.3	413873302
32.35	409322344
32.4	415740100
32.45	410953695
32.5	416345131
32.55	411242600
32.6	417424751
32.65	411794486
32.7	417179199
32.75	411484050
32.8	416463639
32.85	410859784
32.9	415624990
32.95	409914399
33	415352607
33.05	410043663
33.1	416337425
33.15	411763892
33.2	417489506
33.25	412551539
33.3	416037421
33.35	410618834
33.4	416316599
33.45	411509818
33.5	416634825
33.55	411459710
33.6	416910141
33.65	410765618
33.7	414432886
33.75	408843578
33.8	410658997
33.85	402358988
33.9	402040936
33.95	392406921
34	393446870
34.05	386966086
34.1	388980707
34.15	384485570
34.2	388267138
34.25	385382103
34.3	395170456
34.35	402624335
34.4	409273323
34.45	401258018
34.5	405422031
34.55	401211129
34.6	405580142
34.65	402466360
34.7	407649545
34.75	402288189
34.8	406640879
34.85	402620726
34.9	406045566
34.95	400795774
35	402043724
35.05	397013699
35.1	400089406
35.15	395848705
35.2	398115522
35.25	395302668
35.3	398039882
35.35	393095312
35.4	395918206
35.45	392985102
35.5	398494480
35.55	395025314
35.6	396962914
35.65	392418063
35.7	395851584
35.75	390928535
35.8	393603756
35.85	389159496
35.9	390212901
35.95	385936455
36	388039968
36.05	383309057
36.1	384164344
36.15	378076825
36.2	380785949
36.25	376221468
36.3	377223726
36.35	372525998
36.4	374262186
36.45	369864350
36.5	374136990
36.55	368998094
36.6	367323808
36.65	362522158
36.7	360598382
36.75	352341620
36.8	355905612
36.85	362521231
36.9	375950272
36.95	378554572
37	379999743
37.05	377331539
37.1	381570304
37.15	377963064
37.2	380956987
37.25	377825865
37.3	381979843
37.35	382430115
37.4	387740139
37.45	387234993
37.5	392886685
37.55	391646886
37.6	395572821
37.65	393971256
37.7	397751611
37.75	396253380
37.8	398523011
37.85	395948692
37.9	398240334
37.95	393517210
38	396797111
38.05	396817668
38.1	400510676
38.15	398586288
38.2	401236141
38.25	399470157
38.3	402110416
38.35	399125990
38.4	400912946
38.45	399139173
38.5	400922963
38.55	398002173
38.6	400355453
38.65	397522174
38.7	397431561
38.75	393197284
38.8	393535064
38.85	390065528
38.9	391493222
38.95	385513692
39	384350137
39.05	377266278
39.1	379604750
39.15	374165380
39.2	375658947
39.25	378269138
39.3	390293842
39.35	397018095
39.4	397944343
39.45	393873431
39.5	397566448
39.55	394249177
39.6	396141043
39.65	393652263
39.7	395908543
39.75	395751863
39.8	398669039
39.85	397881849
39.9	400249051
39.95	397532311
40	399691255
40.05	396823872
40.1	400705442
40.15	396921745
40.2	400028390
40.25	397358026
40.3	400245343
40.35	396544268
40.4	400217463
40.45	397851538
40.5	401719411
40.55	398858389
40.6	402870926
40.65	398263178
40.7	401947180
40.75	398440772
40.8	401286800
40.85	397216867
40.9	402331584
40.95	398595688
41	403325957
41.05	399232441
41.1	402461401
41.15	396988546
41.2	398807732
41.25	391563349
41.3	394289146
41.35	389552489
41.4	391574210
41.45	384308241
41.5	384494502
41.55	378305770
41.6	378547750
41.65	370767860
41.7	374150873
41.75	372596027
41.8	385667112
41.85	389435261
41.9	395879602
41.95	389303333
42	395085559
42.05	393036789
42.1	398126854
42.15	394116228
42.2	399016155
42.25	395464320
42.3	401106295
42.35	396446411
42.4	400495824
42.45	395760666
42.5	401295342
42.55	397736465
42.6	403836808
42.65	400914792
42.7	405763848
42.75	403118004
42.8	408608663
42.85	404870074
42.9	410455740
42.95	404234092
43	407972774
43.05	402058087
43.1	407410425
43.15	402268117
43.2	407081218
43.25	401448843
43.3	407633626
43.35	403132024
43.4	409096182
43.45	405289327
43.5	409221863
43.55	402567649
43.6	406358118
43.65	400591785
43.7	405609974
43.75	399411679
43.8	401816830
43.85	394245201
43.9	395712020
43.95	387876061
44	390603950
44.05	383752520
44.1	388886590
44.15	381408670
44.2	382686947
44.25	377506274
44.3	387487951
44.35	391086505
44.4	407969295
44.45	404012283
44.5	408283941
44.55	403909396
44.6	411287488
44.65	402266838
44.7	407514731
44.75	401185129
44.8	407426575
44.85	401887412
44.9	408111182
44.95	401999238
45	409268576
45.05	404106900
45.1	410875014
45.15	405580394
45.2	410243429
45.25	403330227
45.3	409380411
45.35	403195327
45.4	409734464
45.45	403913757
45.5	410498265
45.55	404525582
45.6	412077259
45.65	405964552
45.7	412939556
45.75	405325478
45.8	410837013
45.85	403626048
45.9	410071413
45.95	403114764
46	410470837
46.05	403739867
46.1	410238673
46.15	402658658
46.2	406282435
46.25	396199935
46.3	401267525
46.35	390681010
46.4	395777964
46.45	387355983
46.5	391671218
46.55	381739512
46.6	384235531
46.65	375103898
46.7	382710081
46.75	381000844
46.8	397250468
46.85	399131377
46.9	402862249
46.95	392906082
47	401521392
47.05	394611538
47.1	402787043
47.15	397115519
47.2	404826197
47.25	398209836
47.3	407005483
47.35	399295128
47.4	407180346
47.45	397991752
47.5	404862397
47.55	394595147
47.6	401939695
47.65	393787568
47.7	402266774
47.75	394318657
47.8	402299593
47.85	394778228
47.9	402681172
47.95	394548290
48	402982336
48.05	393594047
48.1	401515836
48.15	393360274
48.2	400776975
48.25	393215767
48.3	402817167
48.35	394691492
48.4	405496306
48.45	395039273
48.5	402078625
48.55	393451900
48.6	400510515
48.65	390158253
48.7	395905385
48.75	386008614
48.8	393924918
48.85	384956536
48.9	392337264
48.95	381322850
49	387015740
49.05	376624111
49.1	383974709
49.15	378008644
49.2	396081784
49.25	393348766
49.3	400630493
49.35	390619184
49.4	400232539
49.45	390467218
49.5	399747758
49.55	390186249
49.6	399400414
49.65	390210153
49.7	400329970
49.75	390135052
49.8	398365207
49.85	388594383
49.9	397745754
49.95	388523110
50	398301874
50.05	388449835
50.1	398410937
50.15	388651451
50.2	398321506
50.25	388729601
50.3	397173557
50.35	387185212
50.4	395918268
50.45	386187942
50.5	395875047
50.55	386604530
50.6	396004625
50.65	386234621
50.7	395710374
50.75	384798267
50.8	394676360
50.85	385645659
50.9	395949961
50.95	384575153
51	393248658
51.05	381370817
51.1	390397560
51.15	376914329
51.2	385265495
51.25	372962476
51.3	378309380
51.35	367142920
51.4	375214259
51.45	362885179
51.5	367208088
51.55	354884410
51.6	363711630
51.65	357975676
51.7	382548558
51.75	381369066
51.8	391697764
51.85	380048251
51.9	392470481
51.95	382938337
52	392892009
52.05	382723205
52.1	393537823
52.15	382501205
52.2	394309347
52.25	384808717
52.3	395005435
52.35	383477798
52.4	395317920
52.45	385147825
52.5	396134996
52.55	384934193
52.6	395233421
52.65	383732541
52.7	394644690
52.75	383271866
52.8	395457170
52.85	384970659
52.9	395898169
52.95	387042809
53	398635963
53.05	386535427
53.1	398440186
53.15	386161845
53.2	397668910
53.25	385719071
53.3	396977960
53.35	386031730
53.4	397926779
53.45	386770434
53.5	399026844
53.55	387940859
53.6	399757739
53.65	388848996
53.7	398694475
53.75	387490515
53.8	395575285
53.85	383915976
53.9	393375506
53.95	383367915
54	393424220
54.05	381599250
54.1	389899347
54.15	376364201
54.2	384464220
54.25	372335077
54.3	377262319
54.35	366424288
54.4	375821900
54.45	372114679
54.5	395092939
54.55	388042103
54.6	396418747
54.65	384461797
54.7	397488698
54.75	386157133
54.8	396907284
54.85	385352488
54.9	396560146
54.95	385458522
55	396525994
55.05	385890690
55.1	397624532
55.15	387241420
55.2	397983648
55.25	387678862
55.3	399030280
55.35	388656740
55.4	398819126
55.45	388225214
55.5	398116968
55.55	388347794
55.6	398994933
55.65	390164725
55.7	401411513
55.75	391890527
55.8	403374373
55.85	393683187
55.9	404446670
55.95	393388498
56	402101421
56.05	390833398
56.1	400763601
56.15	391531007
56.2	401792747
56.25	391208862
56.3	399740184
56.35	389674365
56.4	398567344
56.45	386957382
56.5	392359548
56.55	378524686
56.6	380826043
56.65	370810481
56.7	378874498
56.75	369942374
56.8	382363416
56.85	384872505
56.9	403113187
56.95	394233591
57	401802026
57.05	393013961
57.1	401562425
57.15	391154842
57.2	399200735
57.25	390940118
57.3	399714199
57.35	392411799
57.4	400579519
57.45	392153887
57.5	400101603
57.55	391639803
57.6	399904407
57.65	391691048
57.7	399470719
57.75	390655881
57.8	399349906
57.85	392298804
57.9	401063964
57.95	392833556
58	400912044
58.05	396021331
58.1	404711978
58.15	397842448
58.2	405868098
58.25	398038056
58.3	405241147
58.35	398369122
58.4	405455774
58.45	398656702
58.5	406930896
58.55	400506475
58.6	408897262
58.65	402800479
58.7	411398409
58.75	405584808
58.8	411021929
58.85	402778707
58.9	408691807
58.95	401118510
59	406797633
59.05	399217215
59.1	405676108
59.15	399114073
59.2	404711208
59.25	395747988
59.3	400910523
59.35	391264760
59.4	396697328
59.45	387323112
59.5	394291284
59.55	395612624
59.6	413102544
59.65	413381076
59.7	415210124
59.75	408459690
59.8	417504181
59.85	410002995
59.9	417083538
59.95	408808607
60	415385973
60.05	408987389
60.1	416575473
60.15	410659240
60.2	417874113
60.25	411278079
60.3	419007174
60.35	411908653
60.4	419776298
60.45	412131324
60.5	418877126
60.55	410681272
60.6	418116018
60.65	410399612
60.7	418715012
60.75	411204072
60.8	420086261
60.85	414466436
60.9	423346035
60.95	415798704
61	424485986
61.05	413801762
61.1	421072825
61.15	411761976
61.2	421536040
61.25	412635480
61.3	420437397
61.35	411258237
61.4	417850808
61.45	408077061
61.5	413970196
61.55	403587695
61.6	407244126
61.65	396140947
61.7	403215654
61.75	390709250
61.8	398835829
61.85	390657839
61.9	401216728
61.95	393293781
62	413490276
62.05	416004561
62.1	423236373
62.15	409913281
62.2	419573333
62.25	409435195
62.3	419253913
62.35	409316112
62.4	419184531
62.45	409142304
62.5	418020964
62.55	406906806
62.6	416787337
62.65	406508816
62.7	415329879
62.75	403394521
62.8	412838346
62.85	400906993
62.9	410071480
62.95	399015141
63	409311366
63.05	398256497
63.1	407463409
63.15	396409042
63.2	406539546
63.25	396136096
63.3	404960216
63.35	394259830
63.4	401119670
63.45	389960441
63.5	400266408
63.55	389727482
63.6	399600988
63.65	388182647
63.7	397689235
63.75	387208923
63.8	397117244
63.85	386587404
63.9	395531690
63.95	384511984
64	393320043
64.05	382193949
64.1	390900555
64.15	379133594
64.2	386740843
64.25	376048362
64.3	384572986
64.35	373593385
64.4	380796397
64.45	369608917
64.5	380074011
64.55	376250353
64.6	399218830
64.65	391915167
64.7	400234778
64.75	389167374
64.8	400358654
64.85	389722644
64.9	400426544
64.95	390431659
65	400835463
65.05	389889880
65.1	399649157
65.15	389209587
65.2	399327856
65.25	389509146
65.3	401190423
65.35	390085009
65.4	401036072
65.45	391962421
65.5	402309122
65.55	391061193
65.6	400368908
65.65	389676083
65.7	399787397
65.75	389669478
65.8	401095782
65.85	391063063
65.9	401275641
65.95	391739571
66	402577494
66.05	392487325
66.1	402439961
66.15	393136798
66.2	403229436
66.25	393191131
66.3	402294315
66.35	391771892
66.4	401222104
66.45	391517552
66.5	401798609
66.55	390026491
66.6	398482193
66.65	387211760
66.7	393444620
66.75	378017636
66.8	382688815
66.85	371871291
66.9	379614821
66.95	372074795
67	384477289
67.05	385299291
67.1	407361314
67.15	403205443
67.2	409621899
67.25	401100139
67.3	410537238
67.35	400444472
67.4	411141198
67.45	403838880
67.5	415105293
67.55	404724817
67.6	413783521
67.65	404089744
67.7	413484852
67.75	405339560
67.8	415386860
67.85	404513677
67.9	413029239
67.95	402162341
68	412195760
68.05	403671542
68.1	414705410
68.15	406112817
68.2	414573868
68.25	405931475
68.3	415011888
68.35	407286848
68.4	414973758
68.45	404918508
68.5	413138822
68.55	404045787
68.6	413285572
68.65	406061006
68.7	414340575
68.75	405979556
68.8	416284960
68.85	406200898
68.9	413208660
68.95	402386550
69	405857927
69.05	395734430
69.1	400763184
69.15	390899286
69.2	396610709
69.25	389685330
69.3	395361376
69.35	384145767
69.4	388321675
69.45	378748917
69.5	385325501
69.55	374661474
69.6	389129269
69.65	390140094
69.7	401288405
69.75	390417877
69.8	397056863
69.85	390707023
69.9	398221831
69.95	393861614
70	401889232
70.05	395224194
70.1	402059631
70.15	393206441
70.2	399809376
70.25	393113436
70.3	400677721
70.35	396550596
70.4	405256857
70.45	398597946
70.5	405197126
70.55	398682146
70.6	405680804
70.65	400184725
70.7	405980797
70.75	398492940
70.8	405214915
70.85	400487680
70.9	407782918
70.95	403142861
71	410411519
71.05	404029323
71.1	410905900
71.15	406233334
71.2	414065218
71.25	407087424
71.3	413006993
71.35	405624817
71.4	411201131
71.45	402949985
71.5	407922909
71.55	401968256
71.6	406087706
71.65	398450206
71.7	403926590
71.75	394084948
71.8	395392640
71.85	387740064
71.9	392709802
71.95	383140258
72	388868775
72.05	383736536
72.1	394217945
72.15	401280494
72.2	412977461
72.25	404197332
72.3	409360205
72.35	403690724
72.4	408564890
72.45	401514235
72.5	407280772
72.55	402790975
72.6	408668033
72.65	402661400
72.7	407322342
72.75	401924306
72.8	408463122
72.85	402334325
72.9	407238387
72.95	402542063
73	408437917
73.05	401986188
73.1	406777317
73.15	401196609
73.2	407625780
73.25	402952384
73.3	409464515
73.35	405106290
73.4	411416345
73.45	407449280
73.5	412970391
73.55	407862452
73.6	411297687
73.65	405907038
73.7	413248421
73.75	410321659
73.8	416373024
73.85	411390670
73.9	416324500
73.95	411531163
74	415999155
74.05	409878330
74.1	414730826
74.15	408293120
74.2	407944303
74.25	399867031
74.3	403027772
74.35	396693958
74.4	398416495
74.45	393190247
74.5	396082932
74.55	391308656
74.6	393364728
74.65	387752346
74.7	385155416
74.75	376693310
74.8	386802127
74.85	396992153
74.9	411628276
74.95	408609859
75	408926587
75.05	408806487
75.1	414185038
75.15	410058984
75.2	414435098
75.25	409192145
75.3	412069052
75.35	407551566
75.4	412036609
75.45	410139646
75.5	414876714
75.55	411315559
75.6	415891637
75.65	412880214
75.7	417279056
75.75	413522074
75.8	415252114
75.85	410755571
75.9	413227290
75.95	409875178
76	413406441
76.05	410481613
76.1	413818193
76.15	410181027
76.2	413078411
76.25	409728762
76.3	413217594
76.35	408121741
76.4	410470644
76.45	405607880
76.5	408948423
76.55	405892125
76.6	408583389
76.65	405083322
76.7	405471326
76.75	399758283
76.8	401234254
76.85	398145186
76.9	397748837
76.95	394326655
77	394240486
77.05	389081644
77.1	390512959
77.15	384041715
77.2	385783000
77.25	384613464
77.3	391566143
77.35	397923360
77.4	405573777
77.45	401455334
77.5	401684719
77.55	400293850
77.6	402186869
77.65	399846032
77.7	403298853
77.75	400311704
77.8	402977387
77.85	401388733
77.9	404275981
77.95	402290314
78	406193585
78.05	402907134
78.1	405638031
78.15	402608829
78.2	406269608
78.25	405158092
78.3	410130314
78.35	407728273
78.4	411583923
78.45	410266454
78.5	413311858
78.55	412564197
78.6	414026478
78.65	410811272
78.7	412519747
78.75	410715251
78.8	414621414
78.85	413601030
78.9	416388266
78.95	414792797
79	418657789
79.05	417076467
79.1	419605006
79.15	415561833
79.2	414757668
79.25	409431109
79.3	407868528
79.35	404181178
79.4	404641604
79.45	401320777
79.5	401106813
79.55	396345678
79.6	397999364
79.65	394987984
79.7	396524278
79.75	392162636
79.8	391283247
79.85	396200517
79.9	408404171
79.95	413987890
80	414833140
80.05	412478954
80.1	415992704
80.15	414019770
80.2	417806717
80.25	415357285
80.3	417756108
80.35	412977405
80.4	414737462
80.45	411470268
80.5	414291445
80.55	411217512
80.6	414546424
80.65	410559877
80.7	413853909
80.75	410555040
80.8	414385944
80.85	409567416
80.9	411865116
80.95	405398150
81	408642594
81.05	405432530
81.1	409097976
81.15	405186717
81.2	408289759
81.25	404487215
81.3	408511922
81.35	405333967
81.4	408660469
81.45	403355788
81.5	405493419
81.55	400619450
81.6	404345772
81.65	403093135
81.7	407158221
81.75	402586262
81.8	402829182
81.85	397360293
81.9	400046105
81.95	392328009
82	390872759
82.05	378780152
82.1	379652579
82.15	372786071
82.2	376013912
82.25	370460899
82.3	375080758
82.35	377811480
82.4	398480612
82.45	399989160
82.5	401441596
82.55	395582465
82.6	400302852
82.65	395184864
82.7	400179551
82.75	396279287
82.8	401590073
82.85	397163167
82.9	401702722
82.95	398208236
83	404081739
83.05	399315879
83.1	403859286
83.15	398954872
83.2	402424406
83.25	396927587
83.3	401239829
83.35	398642785
83.4	403709637
83.45	398920398
83.5	405505471
83.55	400700014
83.6	405658876
83.65	400395494
83.7	404079488
83.75	399290052
83.8	404352040
83.85	398794892
83.9	405640129
83.95	400015674
84	405291992
84.05	400940282
84.1	405333058
84.15	399451110
84.2	403533858
84.25	395559235
84.3	398151395
84.35	390409101
84.4	395501009
84.45	388118392
84.5	390479106
84.55	380599696
84.6	385125609
84.65	376885519
84.7	380842133
84.75	376064147
84.8	385113492
84.85	389531289
84.9	399351448
84.95	391470136
85	396702995
85.05	391735442
85.1	396937713
85.15	392061788
85.2	400646869
85.25	394430022
85.3	400445346
85.35	393980130
85.4	397510574
85.45	390403227
85.5	397252264
85.55	391407435
85.6	399639813
85.65	394061833
85.7	400572012
85.75	394702351
85.8	401653790
85.85	395861519
85.9	402168064
85.95	394268411
86	399492726
86.05	393485880
86.1	401145397
86.15	395046407
86.2	402799108
86.25	396645716
86.3	404170886
86.35	397486132
86.4	404213962
86.45	398012639
86.5	403972731
86.55	396116349
86.6	402922450
86.65	396593965
86.7	402310749
86.75	394576750
86.8	401464933
86.85	393191429
86.9	398210000
86.95	389223297
87	396144339
87.05	388101771
87.1	395845159
87.15	385014809
87.2	390929729
87.25	382712746
87.3	390843483
87.35	388091745
87.4	403791295
87.45	406354837
87.5	413979611
87.55	403781837
87.6	414251308
87.65	405214637
87.7	412259949
87.75	404874752
87.8	414029513
87.85	406176226
87.9	414948739
87.95	407046541
88	415070928
88.05	406697535
88.1	414807894
88.15	406920692
88.2	414204708
88.25	403975310
88.3	411127249
88.35	401810615
88.4	410060285
88.45	401541783
88.5	409281759
88.55	401007244
88.6	409397011
88.65	400404659
88.7	409087112
88.75	399818329
88.8	409119040
88.85	400538031
88.9	408519979
88.95	399775316
89	409246723
89.05	400582214
89.1	409429451
89.15	400433639
89.2	409584557
89.25	400398623
89.3	409646862
89.35	398260389
89.4	407583225
89.45	396488792
89.5	403998731
89.55	391722315
89.6	399918229
89.65	390010870
89.7	396525808
89.75	385278859
89.8	390295313
89.85	377763290
89.9	383001463
89.95	372849044
90	378700637
90.05	370623334
90.1	386248587
90.15	391096753
90.2	402737470
90.25	393766183
90.3	402240093
90.35	394103750
90.4	403360655
90.45	393460806
90.5	403009540
90.55	392164732
90.6	401889575
90.65	391100662
90.7	400442437
90.75	390750042
90.8	401063280
90.85	391478534
90.9	402702665
90.95	393238315
91	403750492
91.05	391473632
91.1	401410007
91.15	390320274
91.2	401189599
91.25	390763732
91.3	402233854
91.35	391817780
91.4	403207847
91.45	393875694
91.5	405217775
91.55	395554416
91.6	404946445
91.65	394281910
91.7	403421595
91.75	393883818
91.8	405520138
91.85	395037168
91.9	405664135
91.95	392485282
92	400715823
92.05	387820260
92.1	398176503
92.15	385641416
92.2	395435826
92.25	385135285
92.3	393762572
92.35	380155109
92.4	387667209
92.45	376339747
92.5	386583186
92.55	382488665
92.6	402277044
92.65	400449515
92.7	406886348
92.75	393282919
92.8	406163696
92.85	394806441
92.9	407060303
92.95	395300314
93	408363993
93.05	398359886
93.1	411396115
93.15	401277651
93.2	413720528
93.25	404116345
93.3	413715494
93.35	402625795
93.4	413540089
93.45	403312100
93.5	416802480
93.55	406391326
93.6	419100193
93.65	409176092
93.7	423281645
93.75	411473903
93.8	424194102
93.85	412440074
93.9	423318542
93.95	411323077
94	422868330
94.05	412731338
94.1	424639791
94.15	412240619
94.2	424007762
94.25	413542291
94.3	427055550
94.35	414760162
94.4	425877856
94.45	413610967
94.5	424068283
94.55	411438589
94.6	422122329
94.65	409793532
94.7	420075413
94.75	405990451
94.8	415115537
94.85	399724366
94.9	410564311
94.95	400000289
95	407268044
95.05	392224552
95.1	402854030
95.15	398209886
95.2	421615207
95.25	414530870
95.3	426047959
95.35	413621380
95.4	427087869
95.45	416944519
95.5	429484525
95.55	416870347
95.6	427158990
95.65	414485330
95.7	426444507
95.75	414755810
95.8	426346052
95.85	415008266
95.9	426167337
95.95	415458078
96	426332355
96.05	415392167
96.1	425910471
96.15	412553889
96.2	421344014
96.25	410459605
96.3	421346297
96.35	410792159
96.4	421516839
96.45	411579146
96.5	422406655
96.55	413374968
96.6	424416676
96.65	414586201
96.7	425121245
96.75	412961207
96.8	422006553
96.85	412161295
96.9	420991767
96.95	411346165
97	419076940
97.05	405658360
97.1	408034790
97.15	395133027
97.2	404105141
97.25	391137658
97.3	398327045
97.35	388042019
97.4	393823823
97.45	382887382
97.5	388171908
97.55	380259276
97.6	389911788
97.65	389857019
97.7	406515649
97.75	400894498
97.8	405686293
97.85	398348360
97.9	406671717
97.95	398969603
98	407548130
98.05	401214566
98.1	409633396
98.15	403035075
98.2	411321418
98.25	404657147
98.3	413094102
98.35	405094858
98.4	411267794
98.45	403376385
98.5	410422660
98.55	403791505
98.6	412522586
98.65	406033027
98.7	413803150
98.75	408481030
98.8	416061002
98.85	409585261
98.9	416443220
98.95	408421265
99	414378109
99.05	407094302
99.1	414221966
99.15	407805461
99.2	415947746
99.25	410051770
99.3	417750980
99.35	410406964
99.4	418536438
99.45	411491989
99.5	416307267
99.55	406864959
99.6	409890091
99.65	401149386
99.7	406123384
99.75	396886916
99.8	402490342
99.85	394108867
99.9	398930470
99.95	389535298
[truncated: 2,012 more rows]

## Sheet: Fig4H
Time	Counts
0.05	3.34655e+08
0.1	3.35484e+08
0.15	3.33338e+08
0.2	3.35998e+08
0.25	3.3251e+08
0.3	3.35639e+08
0.35	3.32226e+08
0.4	3.35001e+08
0.45	3.31692e+08
0.5	3.34583e+08
0.55	3.30927e+08
0.6	3.34053e+08
0.65	3.30293e+08
0.7	3.33322e+08
0.75	3.29704e+08
0.8	3.32633e+08
0.85	3.28985e+08
0.9	3.32228e+08
0.95	3.28013e+08
1	3.32145e+08
1.05	3.27195e+08
1.1	3.31692e+08
1.15	3.27361e+08
1.2	3.30599e+08
1.25	3.27992e+08
1.3	3.30186e+08
1.35	3.27765e+08
1.4	3.31051e+08
1.45	3.27289e+08
1.5	3.31761e+08
1.55	3.27958e+08
1.6	3.31797e+08
1.65	3.2915e+08
1.7	3.32368e+08
1.75	3.29793e+08
1.8	3.33705e+08
1.85	3.30337e+08
1.9	3.35002e+08
1.95	3.31217e+08
2	3.36218e+08
2.05	3.32082e+08
2.1	3.37524e+08
2.15	3.32948e+08
2.2	3.38568e+08
2.25	3.34058e+08
2.3	3.39241e+08
2.35	3.35171e+08
2.4	3.39852e+08
2.45	3.35937e+08
2.5	3.4055e+08
2.55	3.3634e+08
2.6	3.41137e+08
2.65	3.36626e+08
2.7	3.41406e+08
2.75	3.36893e+08
2.8	3.41483e+08
2.85	3.36853e+08
2.9	3.41635e+08
2.95	3.36528e+08
3	3.41592e+08
3.05	3.36368e+08
3.1	3.41145e+08
3.15	3.36269e+08
3.2	3.40807e+08
3.25	3.35794e+08
3.3	3.40747e+08
3.35	3.35346e+08
3.4	3.40421e+08
3.45	3.35384e+08
3.5	3.40049e+08
3.55	3.35235e+08
3.6	3.40438e+08
3.65	3.3473e+08
3.7	3.41033e+08
3.75	3.34988e+08
3.8	3.4099e+08
3.85	3.36071e+08
3.9	3.41177e+08
3.95	3.36806e+08
4	3.4227e+08
4.05	3.37463e+08
4.1	3.43255e+08
4.15	3.38933e+08
4.2	3.44016e+08
4.25	3.40292e+08
4.3	3.45752e+08
4.35	3.408e+08
4.4	3.47997e+08
4.45	3.41687e+08
4.5	3.49359e+08
4.55	3.43437e+08
4.6	3.50277e+08
4.65	3.44896e+08
4.7	3.51595e+08
4.75	3.45837e+08
4.8	3.52758e+08
4.85	3.46887e+08
4.9	3.53426e+08
4.95	3.47773e+08
5	3.5406e+08
5.05	3.48147e+08
5.1	3.54551e+08
5.15	3.48328e+08
5.2	3.54602e+08
5.25	3.48315e+08
5.3	3.54526e+08
5.35	3.47754e+08
5.4	3.5444e+08
5.45	3.46856e+08
5.5	3.53961e+08
5.55	3.46033e+08
5.6	3.52916e+08
5.65	3.45237e+08
5.7	3.51638e+08
5.75	3.44105e+08
5.8	3.5048e+08
5.85	3.42601e+08
5.9	3.49262e+08
5.95	3.41206e+08
6	3.47684e+08
6.05	3.40096e+08
6.1	3.45945e+08
6.15	3.38997e+08
6.2	3.44397e+08
6.25	3.37828e+08
6.3	3.43123e+08
6.35	3.36573e+08
6.4	3.42327e+08
6.45	3.35152e+08
6.5	3.41912e+08
6.55	3.34095e+08
6.6	3.41181e+08
6.65	3.33954e+08
6.7	3.40179e+08
6.75	3.34051e+08
6.8	3.39899e+08
6.85	3.33591e+08
6.9	3.40463e+08
6.95	3.33081e+08
7	3.40988e+08
7.05	3.33191e+08
7.1	3.41212e+08
7.15	3.33656e+08
7.2	3.41517e+08
7.25	3.34086e+08
7.3	3.42009e+08
7.35	3.34465e+08
7.4	3.42556e+08
7.45	3.34847e+08
7.5	3.43058e+08
7.55	3.35275e+08
7.6	3.43414e+08
7.65	3.35724e+08
7.7	3.43694e+08
7.75	3.36005e+08
7.8	3.44014e+08
7.85	3.36054e+08
7.9	3.44294e+08
7.95	3.36018e+08
8	3.4433e+08
8.05	3.35985e+08
8.1	3.44138e+08
8.15	3.35809e+08
8.2	3.43866e+08
8.25	3.35391e+08
8.3	3.43487e+08
8.35	3.34853e+08
8.4	3.42883e+08
8.45	3.34194e+08
8.5	3.42232e+08
8.55	3.33276e+08
8.6	3.41602e+08
8.65	3.3226e+08
8.7	3.40742e+08
8.75	3.31415e+08
8.8	3.39713e+08
8.85	3.30491e+08
8.9	3.38951e+08
8.95	3.29308e+08
9	3.38387e+08
9.05	3.28311e+08
9.1	3.37619e+08
9.15	3.27759e+08
9.2	3.36764e+08
9.25	3.27409e+08
9.3	3.36087e+08
9.35	3.27212e+08
9.4	3.35549e+08
9.45	3.27158e+08
9.5	3.35378e+08
9.55	3.26839e+08
9.6	3.35888e+08
9.65	3.26273e+08
9.7	3.36556e+08
9.75	3.26228e+08
9.8	3.36626e+08
9.85	3.26941e+08
9.9	3.36381e+08
9.95	3.27657e+08
10	3.36542e+08
10.05	3.27895e+08
10.1	3.37045e+08
10.15	3.27998e+08
10.2	3.37415e+08
10.25	3.28165e+08
10.3	3.37695e+08
10.35	3.28112e+08
10.4	3.38058e+08
10.45	3.27845e+08
10.5	3.38261e+08
10.55	3.27684e+08
10.6	3.3805e+08
10.65	3.27649e+08
10.7	3.376e+08
10.75	3.27495e+08
10.8	3.3714e+08
10.85	3.27079e+08
10.9	3.36772e+08
10.95	3.26378e+08
11	3.36512e+08
11.05	3.25516e+08
11.1	3.36172e+08
11.15	3.24846e+08
11.2	3.3557e+08
11.25	3.2441e+08
11.3	3.34955e+08
11.35	3.23945e+08
11.4	3.34544e+08
11.45	3.23617e+08
11.5	3.33975e+08
11.55	3.23886e+08
11.6	3.33199e+08
11.65	3.24341e+08
11.7	3.33049e+08
11.75	3.24262e+08
11.8	3.33738e+08
11.85	3.24164e+08
11.9	3.34333e+08
11.95	3.248e+08
12	3.34735e+08
12.05	3.25514e+08
12.1	3.35827e+08
12.15	3.25748e+08
12.2	3.37318e+08
12.25	3.26349e+08
12.3	3.38214e+08
12.35	3.27661e+08
12.4	3.38848e+08
12.45	3.28772e+08
12.5	3.39934e+08
12.55	3.29381e+08
12.6	3.411e+08
12.65	3.29986e+08
12.7	3.41909e+08
12.75	3.30565e+08
12.8	3.4256e+08
12.85	3.30907e+08
12.9	3.43012e+08
12.95	3.31164e+08
13	3.43044e+08
13.05	3.31417e+08
13.1	3.42733e+08
13.15	3.31474e+08
13.2	3.42365e+08
13.25	3.31111e+08
13.3	3.42125e+08
13.35	3.30389e+08
13.4	3.41813e+08
13.45	3.29751e+08
13.5	3.4112e+08
13.55	3.29338e+08
13.6	3.40354e+08
13.65	3.28752e+08
13.7	3.39883e+08
13.75	3.28122e+08
13.8	3.39399e+08
13.85	3.27798e+08
13.9	3.38963e+08
13.95	3.27446e+08
14	3.38975e+08
14.05	3.27163e+08
14.1	3.38801e+08
14.15	3.2778e+08
14.2	3.38112e+08
14.25	3.28697e+08
14.3	3.38222e+08
14.35	3.2859e+08
14.4	3.39539e+08
14.45	3.28217e+08
14.5	3.40472e+08
14.55	3.28911e+08
14.6	3.40599e+08
14.65	3.29906e+08
14.7	3.41112e+08
14.75	3.30277e+08
14.8	3.41983e+08
14.85	3.3069e+08
14.9	3.42356e+08
14.95	3.31443e+08
15	3.42541e+08
15.05	3.3183e+08
15.1	3.43013e+08
15.15	3.31836e+08
15.2	3.43315e+08
15.25	3.31959e+08
15.3	3.43212e+08
15.35	3.32031e+08
15.4	3.43019e+08
15.45	3.31857e+08
15.5	3.42711e+08
15.55	3.31649e+08
15.6	3.42073e+08
15.65	3.31455e+08
15.7	3.41279e+08
15.75	3.31048e+08
15.8	3.40512e+08
15.85	3.30394e+08
15.9	3.39746e+08
15.95	3.29573e+08
16	3.38989e+08
16.05	3.28615e+08
16.1	3.38272e+08
16.15	3.27675e+08
16.2	3.37422e+08
16.25	3.26976e+08
16.3	3.36404e+08
16.35	3.26507e+08
16.4	3.35418e+08
16.45	3.26137e+08
16.5	3.34642e+08
16.55	3.25799e+08
16.6	3.34222e+08
16.65	3.25381e+08
16.7	3.34291e+08
16.75	3.24944e+08
16.8	3.34581e+08
16.85	3.2497e+08
16.9	3.34598e+08
16.95	3.25697e+08
17	3.3448e+08
17.05	3.26598e+08
17.1	3.34815e+08
17.15	3.27203e+08
17.2	3.35636e+08
17.25	3.27739e+08
17.3	3.36463e+08
17.35	3.28536e+08
17.4	3.37066e+08
17.45	3.29525e+08
17.5	3.37556e+08
17.55	3.30416e+08
17.6	3.38146e+08
17.65	3.30967e+08
17.7	3.38832e+08
17.75	3.31293e+08
17.8	3.39251e+08
17.85	3.31696e+08
17.9	3.39219e+08
17.95	3.32073e+08
18	3.39037e+08
18.05	3.32061e+08
18.1	3.3882e+08
18.15	3.31805e+08
18.2	3.38304e+08
18.25	3.31484e+08
18.3	3.37596e+08
18.35	3.30798e+08
18.4	3.37072e+08
18.45	3.29642e+08
18.5	3.36551e+08
18.55	3.28574e+08
18.6	3.35504e+08
18.65	3.27999e+08
18.7	3.33996e+08
18.75	3.27634e+08
18.8	3.32643e+08
18.85	3.26928e+08
18.9	3.31941e+08
18.95	3.25761e+08
19	3.31802e+08
19.05	3.24607e+08
19.1	3.31646e+08
19.15	3.24129e+08
19.2	3.31077e+08
19.25	3.24373e+08
19.3	3.30514e+08
19.35	3.24651e+08
19.4	3.30633e+08
19.45	3.24619e+08
19.5	3.31217e+08
19.55	3.24864e+08
19.6	3.31546e+08
19.65	3.25715e+08
19.7	3.31774e+08
19.75	3.26472e+08
19.8	3.32569e+08
19.85	3.26735e+08
19.9	3.3367e+08
19.95	3.27083e+08
20	3.34377e+08
20.05	3.27752e+08
20.1	3.34861e+08
20.15	3.28199e+08
20.2	3.35495e+08
20.25	3.28339e+08
20.3	3.35958e+08
20.35	3.286e+08
20.4	3.35978e+08
20.45	3.28888e+08
20.5	3.35872e+08
20.55	3.28847e+08
20.6	3.35841e+08
20.65	3.28531e+08
20.7	3.35715e+08
20.75	3.28168e+08
20.8	3.35405e+08
20.85	3.27756e+08
20.9	3.35097e+08
20.95	3.27139e+08
21	3.34931e+08
21.05	3.26384e+08
21.1	3.34759e+08
21.15	3.25793e+08
21.2	3.34411e+08
21.25	3.25518e+08
21.3	3.33962e+08
21.35	3.25405e+08
21.4	3.33652e+08
21.45	3.25365e+08
21.5	3.33517e+08
21.55	3.25454e+08
21.6	3.33614e+08
21.65	3.25523e+08
21.7	3.34193e+08
21.75	3.25423e+08
21.8	3.3517e+08
21.85	3.25549e+08
21.9	3.35961e+08
21.95	3.26389e+08
22	3.36394e+08
22.05	3.27658e+08
22.1	3.3702e+08
22.15	3.28742e+08
22.2	3.38158e+08
22.25	3.29596e+08
22.3	3.39543e+08
22.35	3.30501e+08
22.4	3.40896e+08
22.45	3.31573e+08
22.5	3.42079e+08
22.55	3.3283e+08
22.6	3.43101e+08
22.65	3.34047e+08
22.7	3.44244e+08
22.75	3.34849e+08
22.8	3.45558e+08
22.85	3.35504e+08
22.9	3.46475e+08
22.95	3.3651e+08
23	3.46749e+08
23.05	3.3755e+08
23.1	3.4704e+08
23.15	3.37894e+08
23.2	3.47694e+08
23.25	3.37718e+08
23.3	3.48092e+08
23.35	3.37722e+08
23.4	3.47865e+08
23.45	3.37744e+08
23.5	3.47684e+08
23.55	3.37072e+08
23.6	3.47982e+08
23.65	3.36057e+08
23.7	3.47857e+08
23.75	3.35799e+08
23.8	3.46811e+08
23.85	3.36008e+08
23.9	3.45964e+08
23.95	3.35568e+08
24	3.459e+08
24.05	3.34917e+08
24.1	3.45681e+08
24.15	3.34897e+08
24.2	3.45292e+08
24.25	3.34795e+08
24.3	3.45639e+08
24.35	3.34314e+08
24.4	3.46088e+08
24.45	3.3463e+08
24.5	3.45719e+08
24.55	3.35656e+08
24.6	3.45554e+08
24.65	3.3596e+08
24.7	3.46431e+08
24.75	3.35652e+08
24.8	3.47276e+08
24.85	3.35928e+08
24.9	3.47309e+08
24.95	3.3667e+08
25	3.47168e+08
25.05	3.3704e+08
25.1	3.47301e+08
25.15	3.36957e+08
25.2	3.47431e+08
25.25	3.36706e+08
25.3	3.4735e+08
25.35	3.3637e+08
25.4	3.47021e+08
25.45	3.35949e+08
25.5	3.46436e+08
25.55	3.35443e+08
25.6	3.45621e+08
25.65	3.34873e+08
25.7	3.44587e+08
25.75	3.34184e+08
25.8	3.4358e+08
25.85	3.33074e+08
25.9	3.42911e+08
25.95	3.31577e+08
26	3.42187e+08
26.05	3.30419e+08
26.1	3.4086e+08
26.15	3.29797e+08
26.2	3.39398e+08
26.25	3.28997e+08
26.3	3.38347e+08
26.35	3.28154e+08
26.4	3.37133e+08
26.45	3.27888e+08
26.5	3.35809e+08
26.55	3.27418e+08
26.6	3.35527e+08
26.65	3.26106e+08
26.7	3.35891e+08
26.75	3.25312e+08
26.8	3.35393e+08
26.85	3.25734e+08
26.9	3.34583e+08
26.95	3.25914e+08
27	3.34846e+08
27.05	3.25325e+08
27.1	3.35537e+08
27.15	3.25195e+08
27.2	3.35537e+08
27.25	3.25821e+08
27.3	3.35288e+08
27.35	3.26314e+08
27.4	3.35465e+08
27.45	3.26371e+08
27.5	3.35872e+08
27.55	3.26358e+08
27.6	3.36055e+08
27.65	3.26564e+08
27.7	3.35835e+08
27.75	3.26879e+08
27.8	3.35541e+08
27.85	3.26836e+08
27.9	3.35498e+08
27.95	3.26404e+08
28	3.35345e+08
28.05	3.2612e+08
28.1	3.34684e+08
28.15	3.26009e+08
28.2	3.33902e+08
28.25	3.25581e+08
28.3	3.33317e+08
28.35	3.24918e+08
28.4	3.3265e+08
28.45	3.24311e+08
28.5	3.31931e+08
28.55	3.23557e+08
28.6	3.3148e+08
28.65	3.22694e+08
28.7	3.30963e+08
28.75	3.22294e+08
28.8	3.30102e+08
28.85	3.22216e+08
28.9	3.29602e+08
28.95	3.21718e+08
29	3.29875e+08
29.05	3.21156e+08
29.1	3.3003e+08
29.15	3.21537e+08
29.2	3.29641e+08
29.25	3.22452e+08
29.3	3.29781e+08
29.35	3.22797e+08
29.4	3.30937e+08
29.45	3.22935e+08
29.5	3.3211e+08
29.55	3.23846e+08
29.6	3.32788e+08
29.65	3.25316e+08
29.7	3.33513e+08
29.75	3.26784e+08
29.8	3.34455e+08
29.85	3.28293e+08
29.9	3.35469e+08
29.95	3.29712e+08
30	3.36777e+08
30.05	3.30815e+08
30.1	3.38224e+08
30.15	3.31976e+08
30.2	3.39315e+08
30.25	3.33327e+08
30.3	3.40277e+08
30.35	3.34299e+08
30.4	3.41556e+08
30.45	3.34827e+08
30.5	3.42714e+08
30.55	3.35502e+08
30.6	3.43268e+08
30.65	3.36413e+08
30.7	3.43473e+08
30.75	3.37128e+08
30.8	3.43729e+08
30.85	3.37418e+08
30.9	3.44139e+08
30.95	3.3735e+08
31	3.44544e+08
31.05	3.37296e+08
31.1	3.4462e+08
31.15	3.37568e+08
31.2	3.44364e+08
31.25	3.37969e+08
31.3	3.4423e+08
31.35	3.38215e+08
31.4	3.44325e+08
31.45	3.38548e+08
31.5	3.4443e+08
31.55	3.39085e+08
31.6	3.44761e+08
31.65	3.39533e+08
31.7	3.45516e+08
31.75	3.40017e+08
31.8	3.46317e+08
31.85	3.40905e+08
31.9	3.47062e+08
31.95	3.41888e+08
32	3.48196e+08
32.05	3.42605e+08
32.1	3.4961e+08
32.15	3.43486e+08
32.2	3.50647e+08
32.25	3.44886e+08
32.3	3.51284e+08
32.35	3.46331e+08
32.4	3.52062e+08
32.45	3.4731e+08
32.5	3.53092e+08
32.55	3.47946e+08
32.6	3.53975e+08
32.65	3.48584e+08
32.7	3.54434e+08
32.75	3.49217e+08
32.8	3.54634e+08
32.85	3.49559e+08
32.9	3.54829e+08
32.95	3.49456e+08
33	3.54929e+08
33.05	3.49188e+08
33.1	3.54597e+08
33.15	3.49015e+08
33.2	3.53818e+08
33.25	3.4872e+08
33.3	3.53037e+08
33.35	3.4792e+08
33.4	3.52477e+08
33.45	3.46777e+08
33.5	3.51758e+08
33.55	3.45818e+08
33.6	3.50604e+08
33.65	3.45103e+08
33.7	3.49348e+08
33.75	3.44299e+08
33.8	3.48273e+08
33.85	3.4339e+08
33.9	3.47343e+08
33.95	3.42498e+08
34	3.46537e+08
34.05	3.41745e+08
34.1	3.45671e+08
34.15	3.41402e+08
34.2	3.44655e+08
34.25	3.41222e+08
34.3	3.44088e+08
34.35	3.40543e+08
34.4	3.44241e+08
34.45	3.3967e+08
34.5	3.44301e+08
34.55	3.39367e+08
34.6	3.43904e+08
34.65	3.39328e+08
34.7	3.43596e+08
34.75	3.39077e+08
34.8	3.43346e+08
34.85	3.38899e+08
34.9	3.42791e+08
34.95	3.38793e+08
35	3.42157e+08
35.05	3.38428e+08
35.1	3.41498e+08
35.15	3.37913e+08
35.2	3.40651e+08
35.25	3.37144e+08
35.3	3.39865e+08
35.35	3.35921e+08
35.4	3.39052e+08
35.45	3.34668e+08
35.5	3.37761e+08
35.55	3.3351e+08
35.6	3.3634e+08
35.65	3.31959e+08
35.7	3.35028e+08
35.75	3.30344e+08
35.8	3.3323e+08
35.85	3.29145e+08
35.9	3.31168e+08
35.95	3.27636e+08
36	3.29737e+08
36.05	3.25575e+08
36.1	3.285e+08
36.15	3.24003e+08
36.2	3.26759e+08
36.25	3.22942e+08
36.3	3.25345e+08
36.35	3.21562e+08
36.4	3.24621e+08
36.45	3.20463e+08
36.5	3.2364e+08
36.55	3.2038e+08
36.6	3.22629e+08
36.65	3.20389e+08
36.7	3.22665e+08
36.75	3.20122e+08
36.8	3.23197e+08
36.85	3.20636e+08
36.9	3.23468e+08
36.95	3.21771e+08
37	3.24375e+08
37.05	3.22473e+08
37.1	3.26204e+08
37.15	3.23324e+08
37.2	3.27697e+08
37.25	3.25206e+08
37.3	3.28739e+08
37.35	3.27184e+08
37.4	3.30429e+08
37.45	3.28492e+08
37.5	3.32472e+08
37.55	3.29983e+08
37.6	3.33824e+08
37.65	3.3195e+08
37.7	3.34864e+08
37.75	3.33395e+08
37.8	3.36358e+08
37.85	3.3414e+08
37.9	3.37676e+08
37.95	3.35024e+08
38	3.3819e+08
38.05	3.36016e+08
38.1	3.38439e+08
38.15	3.36436e+08
38.2	3.38795e+08
38.25	3.36432e+08
38.3	3.38843e+08
38.35	3.36429e+08
38.4	3.38526e+08
38.45	3.36248e+08
38.5	3.3818e+08
38.55	3.35788e+08
38.6	3.37779e+08
38.65	3.35349e+08
38.7	3.37229e+08
38.75	3.3494e+08
38.8	3.36781e+08
38.85	3.34352e+08
38.9	3.36692e+08
38.95	3.33562e+08
39	3.36881e+08
39.05	3.32969e+08
39.1	3.36796e+08
39.15	3.33248e+08
39.2	3.36059e+08
39.25	3.34228e+08
39.3	3.35536e+08
39.35	3.34651e+08
39.4	3.36253e+08
39.45	3.34278e+08
39.5	3.37428e+08
39.55	3.34468e+08
39.6	3.37765e+08
39.65	3.35671e+08
39.7	3.37721e+08
39.75	3.36723e+08
39.8	3.38357e+08
39.85	3.37064e+08
39.9	3.39461e+08
39.95	3.37254e+08
40	3.40387e+08
40.05	3.37588e+08
40.1	3.41062e+08
40.15	3.37939e+08
40.2	3.41479e+08
40.25	3.38339e+08
40.3	3.41604e+08
40.35	3.38643e+08
40.4	3.41714e+08
40.45	3.38512e+08
40.5	3.41918e+08
40.55	3.38126e+08
40.6	3.4182e+08
40.65	3.37853e+08
40.7	3.41328e+08
40.75	3.37462e+08
40.8	3.40885e+08
40.85	3.36649e+08
40.9	3.40502e+08
40.95	3.35792e+08
41	3.39752e+08
41.05	3.35201e+08
41.1	3.38845e+08
41.15	3.3446e+08
41.2	3.38237e+08
41.25	3.33556e+08
41.3	3.37622e+08
41.35	3.33084e+08
41.4	3.36726e+08
41.45	3.32933e+08
41.5	3.36169e+08
41.55	3.32511e+08
41.6	3.36294e+08
41.65	3.32035e+08
41.7	3.36607e+08
41.75	3.32025e+08
41.8	3.36896e+08
41.85	3.32397e+08
41.9	3.37374e+08
41.95	3.33005e+08
42	3.37999e+08
42.05	3.339e+08
42.1	3.38731e+08
42.15	3.34911e+08
42.2	3.39726e+08
42.25	3.35858e+08
42.3	3.40926e+08
42.35	3.36803e+08
42.4	3.42128e+08
42.45	3.37815e+08
42.5	3.43159e+08
42.55	3.38973e+08
42.6	3.43871e+08
42.65	3.40175e+08
42.7	3.44503e+08
42.75	3.40896e+08
42.8	3.45447e+08
42.85	3.41017e+08
42.9	3.46345e+08
42.95	3.41154e+08
43	3.46594e+08
43.05	3.41461e+08
43.1	3.46543e+08
43.15	3.41353e+08
43.2	3.46603e+08
43.25	3.4092e+08
43.3	3.46296e+08
43.35	3.40769e+08
43.4	3.45438e+08
43.45	3.4057e+08
43.5	3.44832e+08
43.55	3.39732e+08
43.6	3.44629e+08
43.65	3.38899e+08
43.7	3.43963e+08
43.75	3.38715e+08
43.8	3.43043e+08
43.85	3.38407e+08
43.9	3.42861e+08
43.95	3.37624e+08
44	3.42997e+08
44.05	3.37397e+08
44.1	3.42661e+08
44.15	3.37778e+08
44.2	3.42652e+08
44.25	3.37734e+08
44.3	3.43499e+08
44.35	3.37597e+08
44.4	3.4425e+08
44.45	3.38178e+08
44.5	3.44708e+08
44.55	3.38927e+08
44.6	3.45551e+08
44.65	3.39483e+08
44.7	3.46453e+08
44.75	3.40366e+08
44.8	3.47027e+08
44.85	3.41347e+08
44.9	3.47754e+08
44.95	3.41982e+08
45	3.48529e+08
45.05	3.42669e+08
45.1	3.48894e+08
45.15	3.43374e+08
45.2	3.49235e+08
45.25	3.4357e+08
45.3	3.49718e+08
45.35	3.43526e+08
45.4	3.49837e+08
45.45	3.43493e+08
45.5	3.49725e+08
45.55	3.43107e+08
45.6	3.49602e+08
45.65	3.42532e+08
45.7	3.4908e+08
45.75	3.42065e+08
45.8	3.48311e+08
45.85	3.41286e+08
45.9	3.47716e+08
45.95	3.40269e+08
46	3.46828e+08
46.05	3.39604e+08
46.1	3.4562e+08
46.15	3.38796e+08
46.2	3.44986e+08
46.25	3.37406e+08
46.3	3.44615e+08
46.35	3.36523e+08
46.4	3.43531e+08
46.45	3.36421e+08
46.5	3.42523e+08
46.55	3.35912e+08
46.6	3.424e+08
46.65	3.35254e+08
46.7	3.42091e+08
46.75	3.35521e+08
46.8	3.41404e+08
46.85	3.35797e+08
46.9	3.41719e+08
46.95	3.35195e+08
47	3.42682e+08
47.05	3.34989e+08
47.1	3.42872e+08
47.15	3.35676e+08
47.2	3.42861e+08
47.25	3.35967e+08
47.3	3.43586e+08
47.35	3.35741e+08
47.4	3.4428e+08
47.45	3.35881e+08
47.5	3.44438e+08
47.55	3.36173e+08
47.6	3.44513e+08
47.65	3.36282e+08
47.7	3.44435e+08
47.75	3.36455e+08
47.8	3.44146e+08
47.85	3.36331e+08
47.9	3.44165e+08
47.95	3.35695e+08
48	3.44126e+08
48.05	3.35347e+08
48.1	3.43395e+08
48.15	3.35288e+08
48.2	3.42771e+08
48.25	3.34484e+08
48.3	3.42892e+08
48.35	3.33251e+08
48.4	3.42671e+08
48.45	3.32882e+08
48.5	3.41492e+08
48.55	3.33042e+08
48.6	3.40555e+08
48.65	3.3251e+08
48.7	3.40441e+08
48.75	3.31668e+08
48.8	3.40209e+08
48.85	3.31414e+08
48.9	3.39632e+08
48.95	3.31282e+08
49	3.39493e+08
49.05	3.30798e+08
49.1	3.39646e+08
49.15	3.30589e+08
49.2	3.39468e+08
49.25	3.3079e+08
49.3	3.39355e+08
49.35	3.30729e+08
49.4	3.39734e+08
49.45	3.30448e+08
49.5	3.40102e+08
49.55	3.30469e+08
49.6	3.40162e+08
49.65	3.30674e+08
49.7	3.40174e+08
49.75	3.30809e+08
49.8	3.40163e+08
49.85	3.30881e+08
49.9	3.40151e+08
49.95	3.30713e+08
50	3.40242e+08
50.05	3.30336e+08
50.1	3.40103e+08
50.15	3.30131e+08
50.2	3.39534e+08
50.25	3.29956e+08
50.3	3.38908e+08
50.35	3.2941e+08
50.4	3.38368e+08
50.45	3.28631e+08
50.5	3.37669e+08
50.55	3.27765e+08
50.6	3.36888e+08
50.65	3.26701e+08
50.7	3.36072e+08
50.75	3.25617e+08
50.8	3.35056e+08
50.85	3.24594e+08
50.9	3.34061e+08
50.95	3.23407e+08
51	3.33328e+08
51.05	3.22194e+08
51.1	3.32535e+08
51.15	3.21445e+08
51.2	3.31443e+08
51.25	3.21221e+08
51.3	3.30335e+08
51.35	3.21171e+08
51.4	3.29687e+08
51.45	3.20899e+08
51.5	3.29853e+08
51.55	3.20299e+08
51.6	3.30607e+08
51.65	3.19958e+08
51.7	3.31175e+08
51.75	3.20457e+08
51.8	3.31401e+08
51.85	3.21357e+08
51.9	3.31958e+08
51.95	3.22021e+08
52	3.3296e+08
52.05	3.22707e+08
52.1	3.33865e+08
52.15	3.23669e+08
52.2	3.34712e+08
52.25	3.245e+08
52.3	3.35765e+08
52.35	3.25171e+08
52.4	3.36643e+08
52.45	3.26054e+08
52.5	3.37207e+08
52.55	3.26818e+08
52.6	3.37971e+08
52.65	3.27106e+08
52.7	3.38772e+08
52.75	3.27522e+08
52.8	3.38929e+08
52.85	3.28295e+08
52.9	3.38874e+08
52.95	3.28524e+08
53	3.39468e+08
53.05	3.28012e+08
53.1	3.40077e+08
53.15	3.27845e+08
53.2	3.39823e+08
53.25	3.28175e+08
53.3	3.3933e+08
53.35	3.2803e+08
53.4	3.39281e+08
53.45	3.27465e+08
53.5	3.39071e+08
53.55	3.2725e+08
53.6	3.38309e+08
53.65	3.27257e+08
53.7	3.37501e+08
53.75	3.27087e+08
53.8	3.36833e+08
53.85	3.26798e+08
53.9	3.36383e+08
53.95	3.26185e+08
54	3.36424e+08
54.05	3.25417e+08
54.1	3.36286e+08
54.15	3.2552e+08
54.2	3.35337e+08
54.25	3.26275e+08
54.3	3.34786e+08
54.35	3.26152e+08
54.4	3.35643e+08
54.45	3.25311e+08
54.5	3.36695e+08
54.55	3.25262e+08
54.6	3.36989e+08
54.65	3.25935e+08
54.7	3.37326e+08
54.75	3.26416e+08
54.8	3.38064e+08
54.85	3.26924e+08
54.9	3.38643e+08
54.95	3.27779e+08
55	3.39099e+08
55.05	3.2858e+08
55.1	3.39727e+08
55.15	3.29215e+08
55.2	3.40331e+08
55.25	3.29858e+08
55.3	3.40772e+08
55.35	3.30483e+08
55.4	3.41091e+08
55.45	3.31038e+08
55.5	3.41257e+08
55.55	3.31445e+08
55.6	3.41425e+08
55.65	3.31486e+08
55.7	3.41685e+08
55.75	3.3129e+08
55.8	3.41758e+08
55.85	3.31157e+08
55.9	3.41516e+08
55.95	3.31059e+08
56	3.41135e+08
56.05	3.30878e+08
56.1	3.40702e+08
56.15	3.30632e+08
56.2	3.4027e+08
56.25	3.3033e+08
56.3	3.39914e+08
56.35	3.30047e+08
56.4	3.39483e+08
56.45	3.30052e+08
56.5	3.38855e+08
56.55	3.30323e+08
56.6	3.38347e+08
56.65	3.30442e+08
56.7	3.3838e+08
56.75	3.30233e+08
56.8	3.38855e+08
56.85	3.30051e+08
56.9	3.39337e+08
56.95	3.30232e+08
57	3.39674e+08
57.05	3.30722e+08
57.1	3.39985e+08
57.15	3.31392e+08
57.2	3.40299e+08
57.25	3.32196e+08
57.3	3.40677e+08
57.35	3.32937e+08
57.4	3.41295e+08
57.45	3.33507e+08
57.5	3.42038e+08
57.55	3.34126e+08
57.6	3.42679e+08
57.65	3.3482e+08
57.7	3.4336e+08
57.75	3.35386e+08
57.8	3.44083e+08
57.85	3.36066e+08
57.9	3.44469e+08
57.95	3.3705e+08
58	3.44684e+08
58.05	3.37813e+08
58.1	3.45306e+08
58.15	3.38142e+08
58.2	3.46007e+08
58.25	3.38645e+08
58.3	3.46272e+08
58.35	3.39349e+08
58.4	3.46536e+08
58.45	3.39654e+08
58.5	3.47103e+08
58.55	3.39764e+08
58.6	3.47409e+08
58.65	3.40262e+08
58.7	3.4731e+08
58.75	3.40791e+08
58.8	3.47418e+08
58.85	3.4094e+08
58.9	3.47778e+08
58.95	3.41067e+08
59	3.47991e+08
59.05	3.41426e+08
59.1	3.48162e+08
59.15	3.4176e+08
59.2	3.48613e+08
59.25	3.41915e+08
59.3	3.49347e+08
59.35	3.42117e+08
59.4	3.49981e+08
59.45	3.4289e+08
59.5	3.50052e+08
59.55	3.44363e+08
59.6	3.49981e+08
59.65	3.45539e+08
59.7	3.50934e+08
59.75	3.45611e+08
59.8	3.52798e+08
59.85	3.45589e+08
59.9	3.54045e+08
59.95	3.4665e+08
60	3.54333e+08
60.05	3.48086e+08
60.1	3.54849e+08
60.15	3.4879e+08
60.2	3.5596e+08
60.25	3.49089e+08
60.3	3.56858e+08
60.35	3.49641e+08
60.4	3.5728e+08
60.45	3.50154e+08
60.5	3.57725e+08
60.55	3.50262e+08
60.6	3.5817e+08
60.65	3.50265e+08
60.7	3.58188e+08
60.75	3.50399e+08
60.8	3.5791e+08
60.85	3.50236e+08
60.9	3.57854e+08
60.95	3.4952e+08
61	3.57929e+08
61.05	3.48701e+08
61.1	3.57651e+08
61.15	3.48178e+08
61.2	3.56943e+08
61.25	3.47853e+08
61.3	3.56081e+08
61.35	3.47556e+08
61.4	3.55288e+08
61.45	3.47183e+08
61.5	3.54661e+08
61.55	3.46717e+08
61.6	3.54315e+08
61.65	3.46015e+08
61.7	3.54459e+08
61.75	3.4503e+08
61.8	3.54821e+08
61.85	3.44447e+08
61.9	3.54519e+08
61.95	3.44845e+08
62	3.53673e+08
62.05	3.45252e+08
62.1	3.53582e+08
62.15	3.44664e+08
62.2	3.54248e+08
62.25	3.43958e+08
62.3	3.54334e+08
62.35	3.4399e+08
62.4	3.53776e+08
62.45	3.43995e+08
62.5	3.53452e+08
62.55	3.43429e+08
62.6	3.53251e+08
62.65	3.42724e+08
62.7	3.5274e+08
62.75	3.41999e+08
62.8	3.52028e+08
62.85	3.41108e+08
62.9	3.51129e+08
62.95	3.40136e+08
63	3.5002e+08
63.05	3.39027e+08
63.1	3.48854e+08
63.15	3.37843e+08
63.2	3.47414e+08
63.25	3.36872e+08
63.3	3.45725e+08
63.35	3.35769e+08
63.4	3.44424e+08
63.45	3.34103e+08
63.5	3.43552e+08
63.55	3.3241e+08
63.6	3.42411e+08
63.65	3.31265e+08
63.7	3.40968e+08
63.75	3.30336e+08
63.8	3.39797e+08
63.85	3.29335e+08
63.9	3.38878e+08
63.95	3.28527e+08
64	3.38068e+08
64.05	3.27893e+08
64.1	3.37546e+08
64.15	3.27402e+08
64.2	3.37112e+08
64.25	3.27415e+08
64.3	3.366e+08
64.35	3.27624e+08
64.4	3.36748e+08
64.45	3.27245e+08
64.5	3.37786e+08
64.55	3.26816e+08
64.6	3.38537e+08
64.65	3.27404e+08
64.7	3.38577e+08
64.75	3.28446e+08
64.8	3.38952e+08
64.85	3.28968e+08
64.9	3.39846e+08
64.95	3.29469e+08
65	3.40408e+08
65.05	3.30399e+08
65.1	3.40783e+08
65.15	3.31058e+08
65.2	3.4159e+08
65.25	3.31255e+08
65.3	3.42372e+08
65.35	3.3169e+08
65.4	3.42573e+08
65.45	3.32372e+08
65.5	3.42615e+08
65.55	3.32705e+08
65.6	3.4292e+08
65.65	3.32662e+08
65.7	3.43163e+08
65.75	3.32653e+08
65.8	3.43075e+08
65.85	3.32705e+08
65.9	3.42854e+08
65.95	3.32609e+08
66	3.42636e+08
66.05	3.32445e+08
66.1	3.42293e+08
66.15	3.32343e+08
66.2	3.41912e+08
66.25	3.3213e+08
66.3	3.41751e+08
66.35	3.31811e+08
66.4	3.41713e+08
66.45	3.31633e+08
66.5	3.41695e+08
66.55	3.31609e+08
66.6	3.41834e+08
66.65	3.31798e+08
66.7	3.41906e+08
66.75	3.3256e+08
66.8	3.41806e+08
66.85	3.33582e+08
66.9	3.42247e+08
66.95	3.34152e+08
67	3.43435e+08
67.05	3.34729e+08
67.1	3.44442e+08
67.15	3.36036e+08
67.2	3.45152e+08
67.25	3.3736e+08
67.3	3.46517e+08
67.35	3.38003e+08
67.4	3.48349e+08
67.45	3.38768e+08
67.5	3.49552e+08
67.55	3.4021e+08
67.6	3.50229e+08
67.65	3.41539e+08
67.7	3.51171e+08
67.75	3.42269e+08
67.8	3.52255e+08
67.85	3.42798e+08
67.9	3.5301e+08
67.95	3.43314e+08
68	3.53414e+08
68.05	3.43742e+08
68.1	3.53401e+08
68.15	3.44236e+08
68.2	3.52946e+08
68.25	3.445e+08
68.3	3.52591e+08
68.35	3.44031e+08
68.4	3.52457e+08
68.45	3.43276e+08
68.5	3.51811e+08
68.55	3.42806e+08
68.6	3.50716e+08
68.65	3.41993e+08
68.7	3.49997e+08
68.75	3.40528e+08
68.8	3.49256e+08
68.85	3.39462e+08
68.9	3.47664e+08
68.95	3.38994e+08
69	3.45901e+08
69.05	3.38176e+08
69.1	3.44719e+08
69.15	3.37041e+08
69.2	3.43676e+08
69.25	3.36135e+08
69.3	3.4276e+08
69.35	3.35113e+08
69.4	3.42458e+08
69.45	3.33948e+08
69.5	3.42372e+08
69.55	3.33319e+08
69.6	3.42051e+08
69.65	3.33307e+08
69.7	3.41704e+08
69.75	3.33719e+08
69.8	3.41358e+08
69.85	3.34529e+08
69.9	3.4125e+08
69.95	3.35139e+08
70	3.41962e+08
70.05	3.35306e+08
70.1	3.43023e+08
70.15	3.35886e+08
70.2	3.43583e+08
70.25	3.37053e+08
70.3	3.44062e+08
70.35	3.37975e+08
70.4	3.44982e+08
70.45	3.38611e+08
70.5	3.45817e+08
70.55	3.39456e+08
70.6	3.46311e+08
70.65	3.40323e+08
70.7	3.46808e+08
70.75	3.40881e+08
70.8	3.47317e+08
70.85	3.41268e+08
70.9	3.47636e+08
70.95	3.41559e+08
71	3.4779e+08
71.05	3.41654e+08
71.1	3.47916e+08
71.15	3.41439e+08
71.2	3.48038e+08
71.25	3.41106e+08
71.3	3.47843e+08
71.35	3.41007e+08
71.4	3.47281e+08
71.45	3.40952e+08
71.5	3.46808e+08
71.55	3.40633e+08
71.6	3.46479e+08
71.65	3.40343e+08
71.7	3.46101e+08
71.75	3.40058e+08
71.8	3.46058e+08
71.85	3.39514e+08
71.9	3.46201e+08
71.95	3.39442e+08
72	3.45728e+08
72.05	3.4015e+08
72.1	3.45238e+08
72.15	3.4041e+08
72.2	3.45844e+08
72.25	3.39982e+08
72.3	3.467e+08
72.35	3.40233e+08
72.4	3.46739e+08
72.45	3.41246e+08
72.5	3.46756e+08
72.55	3.41869e+08
72.6	3.47451e+08
72.65	3.42129e+08
72.7	3.48175e+08
72.75	3.42687e+08
72.8	3.486e+08
72.85	3.43367e+08
72.9	3.49083e+08
72.95	3.43871e+08
73	3.49648e+08
73.05	3.44316e+08
73.1	3.50143e+08
73.15	3.44722e+08
73.2	3.50562e+08
73.25	3.45054e+08
73.3	3.50789e+08
73.35	3.4549e+08
73.4	3.5073e+08
73.45	3.45881e+08
73.5	3.50664e+08
73.55	3.45862e+08
73.6	3.50761e+08
73.65	3.45535e+08
73.7	3.50654e+08
73.75	3.45283e+08
73.8	3.50164e+08
73.85	3.4498e+08
73.9	3.49668e+08
73.95	3.44384e+08
74	3.49197e+08
74.05	3.43784e+08
74.1	3.4844e+08
74.15	3.43425e+08
74.2	3.47572e+08
74.25	3.42981e+08
74.3	3.47027e+08
74.35	3.42408e+08
74.4	3.46578e+08
74.45	3.42255e+08
74.5	3.45882e+08
74.55	3.42533e+08
74.6	3.45513e+08
74.65	3.42472e+08
74.7	3.46071e+08
74.75	3.42138e+08
74.8	3.46778e+08
74.85	3.42658e+08
74.9	3.46759e+08
74.95	3.4402e+08
75	3.46908e+08
75.05	3.44791e+08
75.1	3.48246e+08
75.15	3.44822e+08
75.2	3.49774e+08
75.25	3.45477e+08
75.3	3.50356e+08
75.35	3.46833e+08
75.4	3.50717e+08
75.45	3.47684e+08
75.5	3.51606e+08
75.55	3.47962e+08
75.6	3.52317e+08
75.65	3.48463e+08
75.7	3.52321e+08
75.75	3.49052e+08
75.8	3.52155e+08
75.85	3.49114e+08
75.9	3.52153e+08
75.95	3.48717e+08
76	3.51915e+08
76.05	3.48315e+08
76.1	3.51245e+08
76.15	3.47789e+08
76.2	3.50576e+08
76.25	3.46754e+08
76.3	3.50074e+08
76.35	3.45562e+08
76.4	3.49135e+08
76.45	3.44847e+08
76.5	3.47649e+08
76.55	3.44187e+08
76.6	3.46492e+08
76.65	3.43065e+08
76.7	3.45614e+08
76.75	3.42232e+08
76.8	3.4425e+08
76.85	3.41969e+08
76.9	3.43095e+08
76.95	3.41134e+08
77	3.43082e+08
77.05	3.39825e+08
77.1	3.43169e+08
77.15	3.39468e+08
77.2	3.42518e+08
77.25	3.39903e+08
77.3	3.4211e+08
77.35	3.40089e+08
77.4	3.4239e+08
77.45	3.40291e+08
77.5	3.42763e+08
77.55	3.40843e+08
77.6	3.43316e+08
77.65	3.41364e+08
77.7	3.44218e+08
77.75	3.41987e+08
77.8	3.45063e+08
77.85	3.42902e+08
77.9	3.45947e+08
77.95	3.43718e+08
78	3.47074e+08
78.05	3.44489e+08
78.1	3.48067e+08
78.15	3.45446e+08
78.2	3.48921e+08
78.25	3.46264e+08
78.3	3.49799e+08
78.35	3.47038e+08
78.4	3.5028e+08
78.45	3.481e+08
78.5	3.50371e+08
78.55	3.48887e+08
78.6	3.50769e+08
78.65	3.48966e+08
78.7	3.51317e+08
78.75	3.48922e+08
78.8	3.51396e+08
78.85	3.49017e+08
78.9	3.51219e+08
78.95	3.48828e+08
79	3.51138e+08
79.05	3.48404e+08
79.1	3.50876e+08
79.15	3.48205e+08
79.2	3.50226e+08
79.25	3.482e+08
79.3	3.49582e+08
79.35	3.47967e+08
79.4	3.4939e+08
79.45	3.47369e+08
79.5	3.49557e+08
79.55	3.46858e+08
79.6	3.4955e+08
79.65	3.46958e+08
79.7	3.49145e+08
79.75	3.4755e+08
79.8	3.48781e+08
79.85	3.48061e+08
79.9	3.48933e+08
79.95	3.48183e+08
80	3.49621e+08
80.05	3.48028e+08
80.1	3.50527e+08
80.15	3.47935e+08
80.2	3.51205e+08
80.25	3.48196e+08
80.3	3.51468e+08
80.35	3.48638e+08
80.4	3.51631e+08
80.45	3.48821e+08
80.5	3.51897e+08
80.55	3.48723e+08
80.6	3.52029e+08
80.65	3.48543e+08
80.7	3.51941e+08
80.75	3.48147e+08
80.8	3.51769e+08
80.85	3.475e+08
80.9	3.51384e+08
80.95	3.46883e+08
81	3.50535e+08
81.05	3.46328e+08
81.1	3.49442e+08
81.15	3.4551e+08
81.2	3.48432e+08
81.25	3.44324e+08
81.3	3.47437e+08
81.35	3.43039e+08
81.4	3.4624e+08
81.45	3.4183e+08
81.5	3.44887e+08
81.55	3.40637e+08
81.6	3.43478e+08
81.65	3.39567e+08
81.7	3.42023e+08
81.75	3.38533e+08
81.8	3.40941e+08
81.85	3.37075e+08
81.9	3.40599e+08
81.95	3.35445e+08
82	3.40253e+08
82.05	3.34689e+08
82.1	3.39306e+08
82.15	3.34625e+08
82.2	3.3875e+08
82.25	3.34137e+08
82.3	3.39127e+08
82.35	3.33665e+08
82.4	3.39299e+08
82.45	3.34235e+08
82.5	3.39019e+08
82.55	3.35076e+08
82.6	3.39451e+08
82.65	3.3532e+08
82.7	3.40472e+08
82.75	3.35781e+08
82.8	3.4104e+08
82.85	3.36836e+08
82.9	3.41498e+08
82.95	3.37566e+08
83	3.4248e+08
83.05	3.37906e+08
83.1	3.43281e+08
83.15	3.38685e+08
83.2	3.43369e+08
83.25	3.39598e+08
83.3	3.43587e+08
83.35	3.39674e+08
83.4	3.4439e+08
83.45	3.39216e+08
83.5	3.44789e+08
83.55	3.39288e+08
83.6	3.44229e+08
83.65	3.39577e+08
83.7	3.43758e+08
83.75	3.38948e+08
83.8	3.43929e+08
83.85	3.37844e+08
83.9	3.43604e+08
83.95	3.37467e+08
84	3.42374e+08
84.05	3.37258e+08
84.1	3.41497e+08
84.15	3.36242e+08
84.2	3.41224e+08
84.25	3.35142e+08
84.3	3.40552e+08
84.35	3.34585e+08
84.4	3.39798e+08
84.45	3.33756e+08
84.5	3.39668e+08
84.55	3.32828e+08
84.6	3.39259e+08
84.65	3.32902e+08
84.7	3.38191e+08
84.75	3.33359e+08
84.8	3.37783e+08
84.85	3.33068e+08
84.9	3.38299e+08
84.95	3.32691e+08
85	3.38696e+08
85.05	3.32877e+08
85.1	3.38986e+08
85.15	3.33133e+08
85.2	3.39518e+08
85.25	3.3349e+08
85.3	3.39894e+08
85.35	3.34172e+08
85.4	3.40269e+08
85.45	3.34589e+08
85.5	3.41085e+08
85.55	3.34741e+08
85.6	3.41765e+08
85.65	3.35278e+08
85.7	3.4197e+08
85.75	3.35915e+08
85.8	3.42269e+08
85.85	3.36164e+08
85.9	3.42713e+08
85.95	3.36342e+08
86	3.4294e+08
86.05	3.36513e+08
86.1	3.4316e+08
86.15	3.3644e+08
86.2	3.43398e+08
86.25	3.36388e+08
86.3	3.43329e+08
86.35	3.36529e+08
86.4	3.43124e+08
86.45	3.36553e+08
86.5	3.43078e+08
86.55	3.36434e+08
86.6	3.431e+08
86.65	3.36388e+08
86.7	3.43154e+08
86.75	3.36352e+08
86.8	3.43373e+08
86.85	3.3635e+08
86.9	3.43694e+08
86.95	3.36471e+08
87	3.4422e+08
87.05	3.36531e+08
87.1	3.45047e+08
87.15	3.36788e+08
87.2	3.45532e+08
87.25	3.37934e+08
87.3	3.45402e+08
87.35	3.39415e+08
87.4	3.45858e+08
87.45	3.39862e+08
87.5	3.47536e+08
87.55	3.39684e+08
87.6	3.49027e+08
87.65	3.40373e+08
87.7	3.49445e+08
87.75	3.4162e+08
87.8	3.49842e+08
87.85	3.42238e+08
87.9	3.50688e+08
87.95	3.42552e+08
88	3.5114e+08
88.05	3.43155e+08
88.1	3.51219e+08
88.15	3.43434e+08
88.2	3.51595e+08
88.25	3.43171e+08
88.3	3.51859e+08
88.35	3.43104e+08
88.4	3.51486e+08
88.45	3.43197e+08
88.5	3.51058e+08
88.55	3.42731e+08
88.6	3.50982e+08
88.65	3.41912e+08
88.7	3.50675e+08
88.75	3.41339e+08
88.8	3.49891e+08
88.85	3.40829e+08
88.9	3.49078e+08
88.95	3.40002e+08
89	3.48345e+08
89.05	3.3903e+08
89.1	3.47479e+08
89.15	3.38017e+08
89.2	3.46653e+08
89.25	3.36765e+08
89.3	3.45965e+08
89.35	3.35462e+08
89.4	3.4512e+08
89.45	3.34475e+08
89.5	3.43977e+08
89.55	3.33827e+08
89.6	3.42716e+08
89.65	3.33365e+08
89.7	3.41595e+08
89.75	3.32866e+08
89.8	3.40903e+08
89.85	3.32225e+08
89.9	3.40527e+08
89.95	3.31885e+08
90	3.39959e+08
90.05	3.3214e+08
90.1	3.39392e+08
90.15	3.32341e+08
90.2	3.39583e+08
90.25	3.31997e+08
90.3	3.4044e+08
90.35	3.31631e+08
90.4	3.41249e+08
90.45	3.31685e+08
90.5	3.41847e+08
90.55	3.32e+08
90.6	3.42356e+08
90.65	3.32483e+08
90.7	3.42721e+08
90.75	3.33056e+08
90.8	3.43121e+08
90.85	3.3337e+08
90.9	3.43752e+08
90.95	3.33405e+08
91	3.44317e+08
91.05	3.33525e+08
91.1	3.44546e+08
91.15	3.33765e+08
91.2	3.446e+08
91.25	3.33842e+08
91.3	3.44654e+08
91.35	3.33787e+08
91.4	3.44511e+08
91.45	3.33869e+08
91.5	3.4404e+08
91.55	3.34011e+08
91.6	3.43592e+08
91.65	3.33789e+08
91.7	3.43529e+08
91.75	3.33184e+08
91.8	3.43599e+08
91.85	3.32648e+08
91.9	3.43534e+08
91.95	3.32307e+08
92	3.43451e+08
92.05	3.32109e+08
92.1	3.43293e+08
92.15	3.32319e+08
92.2	3.42968e+08
92.25	3.32763e+08
92.3	3.43011e+08
92.35	3.32983e+08
92.4	3.435e+08
92.45	3.33502e+08
92.5	3.43673e+08
92.55	3.34764e+08
92.6	3.43904e+08
92.65	3.35649e+08
92.7	3.45411e+08
92.75	3.35599e+08
92.8	3.47629e+08
92.85	3.35953e+08
92.9	3.49113e+08
92.95	3.37395e+08
93	3.50051e+08
93.05	3.39091e+08
93.1	3.51152e+08
93.15	3.40715e+08
93.2	3.52256e+08
93.25	3.42385e+08
93.3	3.53447e+08
93.35	3.43665e+08
93.4	3.55038e+08
93.45	3.44524e+08
93.5	3.56609e+08
93.55	3.45419e+08
93.6	3.5783e+08
93.65	3.46295e+08
93.7	3.58904e+08
93.75	3.47037e+08
93.8	3.59627e+08
93.85	3.47937e+08
93.9	3.59844e+08
93.95	3.48768e+08
94	3.60078e+08
94.05	3.49015e+08
94.1	3.60533e+08
94.15	3.48884e+08
94.2	3.60801e+08
94.25	3.48768e+08
94.3	3.60764e+08
94.35	3.48678e+08
94.4	3.60533e+08
94.45	3.4867e+08
94.5	3.60079e+08
94.55	3.48687e+08
94.6	3.59821e+08
94.65	3.48279e+08
94.7	3.60056e+08
94.75	3.47753e+08
94.8	3.60044e+08
94.85	3.48033e+08
94.9	3.59378e+08
94.95	3.48752e+08
95	3.59155e+08
95.05	3.48726e+08
95.1	3.59988e+08
95.15	3.48263e+08
95.2	3.60836e+08
95.25	3.48483e+08
95.3	3.61048e+08
95.35	3.49243e+08
95.4	3.61242e+08
95.45	3.49804e+08
95.5	3.61782e+08
95.55	3.50151e+08
95.6	3.62329e+08
95.65	3.5057e+08
95.7	3.62642e+08
95.75	3.51091e+08
95.8	3.62721e+08
95.85	3.51578e+08
95.9	3.62707e+08
95.95	3.51785e+08
96	3.62722e+08
96.05	3.51677e+08
96.1	3.62593e+08
96.15	3.51464e+08
96.2	3.62161e+08
96.25	3.51152e+08
96.3	3.61491e+08
96.35	3.50642e+08
96.4	3.60628e+08
96.45	3.49937e+08
96.5	3.5962e+08
96.55	3.48934e+08
96.6	3.58627e+08
96.65	3.47615e+08
96.7	3.57534e+08
96.75	3.4635e+08
96.8	3.55987e+08
96.85	3.4541e+08
96.9	3.54096e+08
96.95	3.44501e+08
97	3.52487e+08
97.05	3.43092e+08
97.1	3.51562e+08
97.15	3.41313e+08
97.2	3.50822e+08
97.25	3.4012e+08
97.3	3.49444e+08
97.35	3.39976e+08
97.4	3.47781e+08
97.45	3.39976e+08
97.5	3.4697e+08
97.55	3.39455e+08
97.6	3.46955e+08
97.65	3.39134e+08
97.7	3.46882e+08
97.75	3.39463e+08
97.8	3.46902e+08
97.85	3.39852e+08
97.9	3.47482e+08
97.95	3.40188e+08
98	3.4823e+08
98.05	3.40891e+08
98.1	3.48867e+08
98.15	3.41772e+08
98.2	3.49665e+08
98.25	3.42562e+08
98.3	3.50521e+08
98.35	3.43442e+08
98.4	3.51214e+08
98.45	3.44308e+08
98.5	3.5192e+08
98.55	3.44945e+08
98.6	3.52536e+08
98.65	3.45574e+08
98.7	3.52794e+08
98.75	3.46193e+08
98.8	3.52974e+08
98.85	3.46348e+08
98.9	3.5328e+08
98.95	3.462e+08
99	3.53277e+08
99.05	3.46152e+08
99.1	3.52898e+08
99.15	3.45906e+08
99.2	3.52624e+08
99.25	3.452e+08
99.3	3.52351e+08
99.35	3.44557e+08
99.4	3.51588e+08
99.45	3.44283e+08
99.5	3.50574e+08
99.55	3.43891e+08
99.6	3.49894e+08
99.65	3.43145e+08
99.7	3.4957e+08
99.75	3.4234e+08
99.8	3.49325e+08
99.85	3.41856e+08
99.9	3.48877e+08
99.95	3.41982e+08
[truncated: 2,012 more rows]

[truncated: 7 more sheets: Fig4I, Fig4J, Fig5C, FigS2, FigS3I, FigS3J, FigS5D]
